# Supplementary material for: A robust neuromuscular system protects rat and human skeletal muscle from sarcopenia
Source: publisher site journal article supplement (doi:10.18632/aging.100926), 2016-03-24
Supplement: Supplementary file [file aging-v8i4-100926-supplementary-material-SD1.pdf]

**SUPPLEMENTARY DATA**

Please browse Full text version to see Supplementary Tables 1-4 of this manuscript.

**Supplementary Table 1.** Gene Ontology (GO) of genes regulated with age in the sarcopenic gastrocnemius muscle by RNAseq.

**Supplementary Table 2.** List of genes differentially regulated with age in Gastrocnemius and Triceps

brachii using a 2 by 3 by factorial analysis of muscle RNAseq. (Log2FC: Log2 fold change).

**Supplementary Table 3.** Gene Ontology (GO) of genes differentially regulated with age in Gastrocnemius and Triceps brachii using a 2 by 3 by factorial analysis of muscle RNAseq.

**Supplementary Table 4.** Gene Ontology (GO) of genes commonly regulated with age in Gastrocnemius and Triceps brachii using a 2 by 3 by factorial analysis of muscle RNAseq.

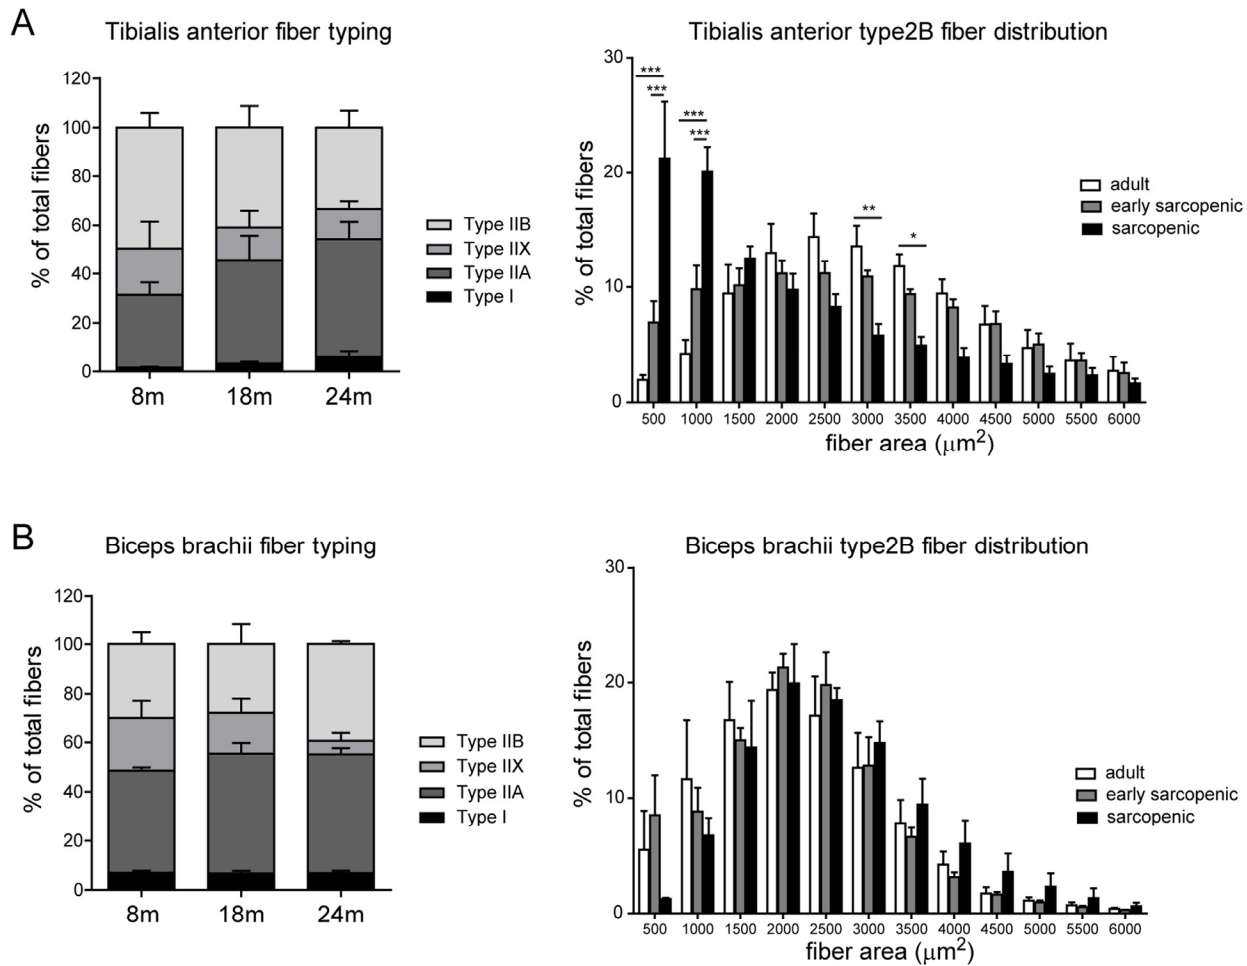

**Supplementary Figure 1. Fiber type composition and fiber type IIB cross-sectional area in aged rats.** Tibialis anterior (A) and biceps brachii (B) fiber type composition and type IIB fiber cross-sectional area distribution. *n*=4-5 per group, >1000 fibers per section were analyzed. \* *p*<0.05 \*\* *p*<0.01 \*\*\* *p*<0.001 with a two-way ANOVA test.
