# Supplementary material for: A robust neuromuscular system protects rat and human skeletal muscle from sarcopenia
Source: publisher site journal article supplement (doi:10.18632/aging.100926), 2016-03-24
Supplement: Supplementary file [file aging-v8i4-100926-supplementary-material-SD3.pdf]

2 by 3 factorial design of muscle RNAseq (Gastrocnemius vs Triceps at 8m / 18m / 24m of age)

Model: Gene ~ b0 + b1MuscleType8m + b2Age18m + b3Age24m + b4Age18m:MuscleType + b5Age24m:MuscleType

Reference group: Adult 8m gastrocnemius

| Gene ID             | Gene Symbol | "log2FC<br>MuscleType Triceps/Gastroc 8m" | log2FC | Age_18m<br>log2FC | Age_24m<br>"log2FC | adj. p-value         |
|---------------------|-------------|-------------------------------------------|--------|-------------------|--------------------|----------------------|
| ENSRNOG00000007102  | Acss1       | -0.693                                    | -0.539 | -1.437            | 1.006              | 2.087 1.31E-06       |
| ENSRNOG00000004932  | Sel1l3      | 0.373                                     | 0.553  | 0.809             | -0.759             | -1.253<br>1.31E-06   |
| ENSRNOG000000042980 | Adam19      | 0.007                                     | 0.898  | 2.037             | -1.032             | -1.827<br>1.42E-06   |
| ENSRNOG000000020369 | Igf2        | -0.196                                    | 0.966  | 2.475             | -0.883             | -2.132<br>1.49E-06   |
| ENSRNOG000000047046 | Plin4       | -0.143                                    | -0.442 | -1.465            | 0.551              | 1.486 2.04E-06       |
| ENSRNOG000000013674 | Megf10      | 0.282                                     | 0.171  | 0.917             | -0.518             | -1.346<br>2.04E-06   |
| ENSRNOG000000055089 | Slc44a1     | -0.020                                    | 0.480  | 1.077             | -0.529             | -<br>0.856 4.42E-06  |
| ENSRNOG000000019826 | Sil1        | 0.049                                     | 0.584  | 1.254             | -0.522             | -1.228<br>4.42E-06   |
| ENSRNOG000000000521 | Cdkn1a      | 0.200                                     | 3.087  | 4.410             | -2.429             | -2.889<br>4.42E-06   |
| ENSRNOG000000002451 | Fndc3c1     | 0.690                                     | 0.972  | 2.208             | -2.583             | -3.520<br>4.42E-06   |
| ENSRNOG000000000585 | Amd1        | 0.026                                     | -0.383 | -0.905            | 0.318              | 0.798<br>7.91E-06    |
| ENSRNOG000000001891 | Gnb1l       | 0.220                                     | 0.484  | 0.848             | -0.407             | -0.985<br>1.64E-05   |
| ENSRNOG000000046171 | Mlxipl      | -0.254                                    | -0.626 | -1.747            |                    | 0.540 1.588 2.47E-05 |
| ENSRNOG000000020779 | Kcna7       | 0.189                                     | -0.580 | -1.460            | 0.543              | 1.303<br>2.47E-05    |
| ENSRNOG000000003452 | Asb11       | 0.204                                     | -0.665 | -1.510            | 0.633              | 1.295<br>2.47E-05    |
| ENSRNOG000000024885 | Asb10       | -0.044                                    | -0.482 | -1.496            | 0.608              | 1.218 2.47E-05       |
| ENSRNOG000000026679 | Scn4b       | 0.052                                     | -0.262 | -1.164            | 0.256              | 1.139<br>2.47E-05    |
| ENSRNOG000000007596 | Rffl        | -0.176                                    | -0.179 | -0.517            | 0.349              | 0.646 2.47E-05       |
| ENSRNOG000000034198 | Wbp5        | 0.388                                     | 0.277  | 0.959             | -0.352             | -0.926<br>2.47E-05   |
| ENSRNOG000000009225 | Copz2       | 0.175                                     | 0.876  | 1.474             | -0.949             | -1.387<br>2.47E-05   |

|                    |                |          |        |        |        |        |
|--------------------|----------------|----------|--------|--------|--------|--------|
| ENSRNOG00000024904 | Pla2g4e        | 0.844    | 0.919  | 1.658  | -1.408 | -2.035 |
| 2.47E-05           |                |          |        |        |        |        |
| ENSRNOG00000051548 | Lmod1          | 0.920    | -1.002 | -2.567 | 1.142  | 2.127  |
| 2.83E-05           |                |          |        |        |        |        |
| ENSRNOG00000057601 | AABR07044080.2 | -0.660   | -0.275 | -1.158 |        |        |
| 0.730              | 1.806          | 2.99E-05 |        |        |        |        |
| ENSRNOG00000029490 | LOC102553763   | -0.116   | -0.297 | -0.831 |        |        |
| 0.278              | 0.674          | 2.99E-05 |        |        |        |        |
| ENSRNOG00000060248 | Chchd6         | 0.184    | 0.616  | 1.427  | -0.917 | -1.561 |
| 2.99E-05           |                |          |        |        |        |        |
| ENSRNOG00000003832 | Vash2          | 0.192    | 1.229  | 2.263  | -1.061 | -2.003 |
| 2.99E-05           |                |          |        |        |        |        |
| ENSRNOG00000020194 | Hes6           | -0.081   | 0.418  | 0.874  | -0.401 | -0.931 |
| 3.37E-05           |                |          |        |        |        |        |
| ENSRNOG00000053560 | Rhou           | -0.687   | -0.350 | -1.234 | 0.649  |        |
| 1.758              | 3.50E-05       |          |        |        |        |        |
| ENSRNOG00000055408 | Gcat           | 0.327    | -0.312 | -0.967 | 0.341  | 1.058  |
| 3.50E-05           |                |          |        |        |        |        |
| ENSRNOG00000002028 | Tmem50b        | -0.109   | -0.353 | -1.180 |        |        |
| 0.282              | 0.928          | 3.50E-05 |        |        |        |        |
| ENSRNOG00000002365 | Itm2a          | 0.668    | -0.107 | 0.315  | -0.365 | -1.043 |
| 3.50E-05           |                |          |        |        |        |        |
| ENSRNOG00000016038 | Mgmt           | 0.062    | 1.436  | 2.589  | -1.347 | -1.927 |
| 3.50E-05           |                |          |        |        |        |        |
| ENSRNOG00000022723 | RGD1562029     | -0.540   | -1.090 | -2.380 |        |        |
| 0.896              | 2.178          | 4.08E-05 |        |        |        |        |
| ENSRNOG00000014166 | Smoc2          | 0.111    | 0.448  | 1.122  | -0.603 | -1.145 |
| 4.12E-05           |                |          |        |        |        |        |
| ENSRNOG00000060972 | Heca           | -0.107   | -0.218 | -0.586 | 0.246  |        |
| 0.647              | 4.13E-05       |          |        |        |        |        |
| ENSRNOG00000021014 | Sec1           | 1.148    | 1.814  | 3.420  | -2.126 | -2.886 |
| 4.13E-05           |                |          |        |        |        |        |
| ENSRNOG00000027300 | Ttc7b          | -0.066   | -0.333 | -1.052 | 0.287  |        |
| 0.769              | 4.19E-05       |          |        |        |        |        |
| ENSRNOG00000002977 | Ttc19          | -0.028   | -0.500 | -1.235 | 0.399  |        |
| 0.943              | 4.44E-05       |          |        |        |        |        |
| ENSRNOG00000017496 | Cnp            | -0.248   | 0.551  | 1.588  | -0.420 | -1.197 |
| 4.44E-05           |                |          |        |        |        |        |
| ENSRNOG00000010283 | Cd28           | 0.310    | 1.808  | 3.497  | -2.260 | -3.003 |
| 4.89E-05           |                |          |        |        |        |        |
| ENSRNOG00000019205 | Gnpat          | 0.010    | -0.358 | -0.823 | 0.368  | 0.764  |
| 5.05E-05           |                |          |        |        |        |        |
| ENSRNOG00000033316 | Foxo4          | 0.122    | -0.308 | -0.891 | 0.315  | 0.746  |
| 5.16E-05           |                |          |        |        |        |        |
| ENSRNOG00000025705 | Armcx2         | -0.330   | 0.483  | 1.955  | -0.295 | -      |
| 1.802              | 5.53E-05       |          |        |        |        |        |
| ENSRNOG00000042189 | Rab31          | -0.072   | 0.686  | 1.534  | -0.684 | -1.163 |
| 6.16E-05           |                |          |        |        |        |        |
| ENSRNOG00000011518 | Dusp26         | 0.720    | -0.504 | -1.199 | 0.473  |        |
| 0.904              | 6.18E-05       |          |        |        |        |        |
| ENSRNOG00000014241 | Ece1           | -0.027   | -0.272 | -0.689 | 0.285  |        |
| 0.801              | 6.18E-05       |          |        |        |        |        |
| ENSRNOG00000050748 | Dpp9           | -0.093   | -0.175 | -0.608 | 0.226  |        |
| 0.550              | 6.18E-05       |          |        |        |        |        |

|                                            |                |        |        |        |        |             |
|--------------------------------------------|----------------|--------|--------|--------|--------|-------------|
| ENSRNOG00000015420<br>0.811 6.18E-05       | Stxbp1         | -0.069 | 0.508  | 1.158  | -0.370 | -           |
| ENSRNOG00000027756<br>6.18E-05             | RGD1560175     | 0.059  | 0.759  | 1.207  | -0.797 | -1.190      |
| ENSRNOG00000025418<br>6.38E-05             | Armc9          | 0.094  | 0.243  | 0.776  | -0.278 | -0.893      |
| ENSRNOG00000000560<br>0.941 6.62E-05       | Lrrc20         | 0.163  | -0.385 |        | -1.187 | 0.342       |
| ENSRNOG00000015019<br>6.71E-05             | Spg21          | -0.101 | 0.735  | 1.594  | -0.703 | -1.137      |
| ENSRNOG00000004763<br>6.71E-05             | Sirpa          | 0.065  | 0.973  | 1.745  | -0.752 | -1.196      |
| ENSRNOG00000009745<br>0.650 6.92E-05       | Ppp3cc         | 0.163  | -0.355 |        | -0.837 | 0.280       |
| ENSRNOG00000031824<br>6.92E-05             | Slc44a2        | 0.200  | 0.364  | 0.568  | -0.417 | -0.625      |
| ENSRNOG00000006733<br>0.729 6.97E-05       | Srgap2         | -0.039 | 0.268  | 0.809  | -0.225 | -           |
| ENSRNOG00000043192<br>7.07E-05             | Hacd1          | 0.074  | 0.085  | 0.404  | -0.494 | -0.979      |
| ENSRNOG00000021365<br>7.44E-05             | Ybey           | 0.122  | -0.443 |        | -1.217 | 0.357 0.968 |
| ENSRNOG00000019773<br>0.340 0.719 7.96E-05 | AABR07044089.1 | 0.109  | -0.336 |        |        | -0.991      |
| ENSRNOG00000036664<br>7.97E-05             | Narf           | 0.082  | -0.423 |        | -0.823 | 0.223 0.589 |
| ENSRNOG00000031851<br>0.392 1.272 8.06E-05 | Ndufa4l2       | -0.344 |        | -0.636 |        | -1.016      |
| ENSRNOG00000021200<br>8.06E-05             | Hfe2           | 0.193  | -0.229 |        | -1.122 | 0.272 0.992 |
| ENSRNOG00000004172<br>8.06E-05             | Pdk2           | 0.030  | -0.314 |        | -1.110 | 0.341 0.928 |
| ENSRNOG00000006756<br>0.727 8.06E-05       | Maged1         | -0.140 | 0.285  | 0.787  | -0.396 | -           |
| ENSRNOG00000008235<br>8.48E-05             | Mylk2          | 0.664  | -0.607 |        | -1.828 | 0.551 1.348 |
| ENSRNOG00000039463<br>1.434 9.03E-05       | Pcdhga1        | 0.218  | -0.456 |        | -1.558 | 0.366       |
| ENSRNOG00000018239<br>1.086 9.03E-05       | Dhrs4          | -0.555 | -0.262 |        | -0.839 | 0.490       |
| ENSRNOG00000017548<br>0.322 0.744 9.03E-05 | Fam53a         | -0.189 |        | -0.346 |        | -0.984      |
| ENSRNOG00000005046<br>9.03E-05             | Tspan13        | 0.832  | 0.628  | 1.015  | -0.522 | -1.053      |
| ENSRNOG00000026592<br>4.315 9.03E-05       | Rhbdl2         | -0.191 |        | 2.191  | 3.508  | -3.050 -    |
| ENSRNOG00000005565<br>1.390 9.24E-05       | Traf3ip3       | -0.127 |        | 1.330  | 2.067  | -0.780 -    |
| ENSRNOG00000017932<br>0.875 9.27E-05       | St3gal2        | 0.386  | -0.458 |        | -1.097 | 0.443       |
| ENSRNOG00000004882<br>9.27E-05             | Capn6          | 0.095  | 0.431  | 1.317  | -0.525 | -1.419      |
| ENSRNOG00000052307<br>1.143 9.31E-05       | Spats2         | -0.308 | 0.205  | 1.174  | -0.469 | -           |

|                                            |                |        |        |        |        |                |
|--------------------------------------------|----------------|--------|--------|--------|--------|----------------|
| ENSRNOG00000046763<br>1.067 9.34E-05       | Adssl1         | 0.077  | -0.472 | -1.346 | 0.490  |                |
| ENSRNOG00000014051<br>0.439 9.34E-05       | Pgrmc2         | -0.078 | 0.226  | 0.578  | -0.164 | -              |
| ENSRNOG00000032922<br>9.34E-05             | Dclk1          | -0.017 | 1.679  | 2.690  | -1.718 | -2.319         |
| ENSRNOG00000013346<br>9.38E-05             | Asb14          | 0.159  | -0.338 | -0.962 | 0.313  | 0.694          |
| ENSRNOG00000049681<br>0.432 9.90E-05       | Mapre2         | 0.029  | -0.217 | -0.456 | 0.194  |                |
| ENSRNOG00000003927                         | Cd55           | 0.434  | 0.022  | -0.834 | 0.210  | 0.907 1.01E-04 |
| ENSRNOG00000017801<br>1.01E-04             | Atf4           | 0.214  | -0.227 | -0.638 | 0.281  | 0.693          |
| ENSRNOG00000004442<br>0.267 1.042 1.03E-04 | RGD1311756     | -0.487 | -0.091 | -0.751 |        |                |
| ENSRNOG00000001911<br>1.03E-04             | Map6d1         | 0.389  | 0.890  | 2.334  | -1.963 | -3.556         |
| ENSRNOG00000001924<br>1.04E-04             | Tp63           | 0.426  | 1.117  | 1.621  | -1.108 | -1.447         |
| ENSRNOG000000021440<br>0.938 1.06E-04      | Pptc7          | -0.282 | -0.528 | -1.110 | 0.391  |                |
| ENSRNOG00000018797<br>0.957 1.12E-04       | Myrip          | -0.101 | -0.264 | -0.661 | 0.421  |                |
| ENSRNOG00000006444<br>1.12E-04             | Fkbp4          | 0.046  | -0.467 | -1.076 | 0.455  | 0.808          |
| ENSRNOG00000006248<br>1.13E-04             | Trim37         | 0.098  | 0.865  | 1.469  | -1.085 | -1.282         |
| ENSRNOG00000012660<br>1.13E-04             | Postn          | 1.242  | 0.942  | 2.760  | -1.615 | -2.630         |
| ENSRNOG00000028356<br>0.647 1.255 1.14E-04 | Chchd10        | -0.206 | -0.477 | -1.433 |        |                |
| ENSRNOG00000057042<br>0.687 1.14E-04       | Pcca           | -0.118 | -0.365 | -0.733 | 0.247  |                |
| ENSRNOG00000059660<br>2.068 1.14E-04       | AABR07065531.5 | 0.236  | 0.014  | 1.229  | -0.396 | -              |
| ENSRNOG00000057367<br>0.443 1.17E-04       | Glud1          | -0.095 | -0.204 | -0.405 | 0.189  |                |
| ENSRNOG00000018552<br>0.682 1.24E-04       | Slc25a38       | 0.318  | -0.254 | -0.779 | 0.307  |                |
| ENSRNOG00000006450<br>1.25E-04             | Erbp2          | -0.157 | 1.129  | 2.552  | -1.913 | -2.442         |
| ENSRNOG00000053537<br>-1.845 1.28E-04      | AABR07070131.1 | -0.184 | 0.222  | 1.514  | -0.378 |                |
| ENSRNOG00000045553<br>1.060 1.37E-04       | Proser2        | 0.008  | -0.472 | -1.287 | 0.581  |                |
| ENSRNOG00000011394<br>1.39E-04             | Kif3c          | -0.109 | 0.892  | 1.292  | -0.745 | -1.129         |
| ENSRNOG00000031364<br>1.44E-04             | Kif1c          | 0.150  | -0.298 | -0.880 | 0.325  | 0.728          |
| ENSRNOG00000061429<br>0.517 0.909 1.59E-04 | Rph3a1         | -0.053 | -0.427 | -0.981 |        |                |
| ENSRNOG00000053691<br>1.64E-04             | Lama5          | -0.064 | 0.643  | 1.170  | -0.685 | -1.013         |

|                    |                |          |        |        |        |
|--------------------|----------------|----------|--------|--------|--------|
| ENSRNOG00000056257 | Cacng7         | 0.327    | -0.458 | -1.875 | 0.478  |
| 1.514              | 1.67E-04       |          |        |        |        |
| ENSRNOG00000004726 | Mapkapk2       | -0.147   | -0.305 | -0.732 |        |
| 0.247              | 0.550          | 1.67E-04 |        |        |        |
| ENSRNOG00000031275 | AABR07054361.1 | 0.192    | 0.216  | 0.556  | -0.328 |
| 0.807              | 1.67E-04       |          |        |        | -      |
| ENSRNOG00000000165 | Pfkfb1         | -0.154   | -0.769 | -1.755 |        |
| 0.609              | 1.510          | 1.69E-04 |        |        |        |
| ENSRNOG00000000168 | Gatm           | -0.083   | 0.166  | 0.989  | -0.245 |
| 1.70E-04           |                |          |        |        | -0.863 |
| ENSRNOG00000016097 | Ccbl1          | -0.130   | -0.343 | -0.894 | 0.211  |
| 0.704              | 1.72E-04       |          |        |        |        |
| ENSRNOG00000060550 | Epn2           | 0.049    | -0.096 | -0.385 | 0.166  |
| 1.73E-04           |                |          |        |        | 0.455  |
| ENSRNOG00000029637 | Acot6          | -0.221   | 2.106  | 4.771  | -2.222 |
| 1.84E-04           |                |          |        |        | -4.853 |
| ENSRNOG00000022373 | Dennd4b        | -0.109   | -0.259 | -0.781 |        |
| 0.326              | 0.722          | 1.87E-04 |        |        |        |
| ENSRNOG00000000503 | Ppard          | 0.073    | -0.122 | -0.427 | 0.255  |
| 1.87E-04           |                |          |        |        | 0.601  |
| ENSRNOG00000050035 | Sall4          | -0.251   | -0.298 | -1.541 | 0.537  |
| 1.559              | 1.96E-04       |          |        |        |        |
| ENSRNOG00000048195 | Nudt13         | -0.263   | -0.240 | -0.770 |        |
| 0.207              | 0.716          | 1.99E-04 |        |        |        |
| ENSRNOG00000050646 | Fem1a          | -0.161   | -0.142 | -0.734 | 0.199  |
| 0.684              | 1.99E-04       |          |        |        |        |
| ENSRNOG00000020737 | Cdc25a         | 0.015    | 0.477  | 1.112  | -0.504 |
| 1.99E-04           |                |          |        |        | -0.913 |
| ENSRNOG00000020032 | Impdh1         | -0.142   | 0.690  | 1.255  | -0.672 |
| 0.974              | 2.07E-04       |          |        |        | -      |
| ENSRNOG00000013781 | Kcnq5          | -0.008   | 0.824  | 1.187  | -0.651 |
| 2.07E-04           |                |          |        |        | -1.005 |
| ENSRNOG00000017876 | Dnajc21        | 0.328    | -0.520 | -1.169 | 0.463  |
| 0.838              | 2.10E-04       |          |        |        |        |
| ENSRNOG00000016863 | Pnmal2         | 0.266    | -0.257 | 0.468  | -0.675 |
| 1.608              | 2.14E-04       |          |        |        | -      |
| ENSRNOG00000025502 | Arhgef37       | -0.044   | -0.358 | -1.165 |        |
| 0.300              | 0.911          | 2.24E-04 |        |        |        |
| ENSRNOG00000010813 | Tspan14        | -0.058   | 0.456  | 0.798  | -0.389 |
| 0.701              | 2.26E-04       |          |        |        | -      |
| ENSRNOG00000004040 | Abca8          | 0.087    | 0.383  | 0.815  | -0.747 |
| 2.26E-04           |                |          |        |        | -0.969 |
| ENSRNOG00000031890 | Ncam1          | -0.532   | 1.856  | 2.803  | -1.881 |
| 2.26E-04           |                |          |        |        | -1.942 |
| ENSRNOG00000054765 | Renbp          | 0.177    | 0.506  | 1.110  | -0.510 |
| 2.34E-04           |                |          |        |        | -0.843 |
| ENSRNOG00000042496 | Cyp4f17        | -0.165   | 0.546  | 1.477  | -0.647 |
| 1.301              | 2.37E-04       |          |        |        | -      |
| ENSRNOG00000057988 | Pfkm           | 0.193    | -0.494 | -1.613 | 0.498  |
| 2.38E-04           |                |          |        |        | 1.198  |
| ENSRNOG00000008079 | Ugp2           | 0.135    | -0.443 | -1.055 | 0.304  |
| 2.38E-04           |                |          |        |        | 0.893  |
| ENSRNOG00000021318 | Epas1          | -0.057   | -0.344 | -0.900 | 0.362  |
| 0.850              | 2.38E-04       |          |        |        |        |

|                    |                |          |        |        |        |        |        |
|--------------------|----------------|----------|--------|--------|--------|--------|--------|
| ENSRNOG00000014882 | Fgf11          | 0.175    | 0.591  | 0.820  | -0.765 | -1.343 |        |
| 2.38E-04           |                |          |        |        |        |        |        |
| ENSRNOG00000019688 | Diaph1         |          | -0.345 |        | -0.161 | -0.464 |        |
| 0.264              | 0.760          | 2.42E-04 |        |        |        |        |        |
| ENSRNOG00000017226 | Slc2a4         |          | -0.005 |        | -0.276 | -0.897 |        |
| 0.282              | 0.727          | 2.59E-04 |        |        |        |        |        |
| ENSRNOG00000001890 | Txnrd2         |          | -0.152 |        | -0.212 | -0.743 |        |
| 0.244              | 0.663          | 2.59E-04 |        |        |        |        |        |
| ENSRNOG00000046705 | Snx3           | 0.199    | -0.258 |        | -0.619 | 0.376  | 0.634  |
| 2.59E-04           |                |          |        |        |        |        |        |
| ENSRNOG00000059500 | Cdkn1c         |          | -0.175 |        | 1.249  | 2.124  | -0.909 |
| 1.418              | 2.59E-04       |          |        |        |        |        | -      |
| ENSRNOG00000009580 | Lca5           | -0.290   |        | 0.760  | 2.222  | -0.870 | -2.065 |
| 2.59E-04           |                |          |        |        |        |        |        |
| ENSRNOG00000029571 | Coq10a         |          | -0.185 |        | -0.324 | -0.862 |        |
| 0.247              | 0.777          | 2.87E-04 |        |        |        |        |        |
| ENSRNOG00000015962 | Nmnat1         |          | -0.011 |        | -0.234 | -0.822 |        |
| 0.206              | 0.582          | 2.87E-04 |        |        |        |        |        |
| ENSRNOG00000003494 | Ppfia4         |          | -0.167 |        | 0.681  | 1.064  | -0.595 |
| 1.030              | 2.87E-04       |          |        |        |        |        | -      |
| ENSRNOG00000008173 | Sesn3          | 0.111    | 0.482  | 1.011  | -0.661 | -1.016 |        |
| 2.88E-04           |                |          |        |        |        |        |        |
| ENSRNOG00000022691 | St8sia5        |          | 0.212  | -0.728 |        | -2.116 | 0.737  |
| 1.516              | 2.93E-04       |          |        |        |        |        |        |
| ENSRNOG00000047218 | Clic5          | -0.013   |        | -0.196 |        | -0.740 | 0.146  |
| 0.677              | 2.93E-04       |          |        |        |        |        |        |
| ENSRNOG00000018985 | Adrbk1         |          | 0.056  | -0.199 |        | -0.455 | 0.206  |
| 0.398              | 2.95E-04       |          |        |        |        |        |        |
| ENSRNOG00000020783 | Ntf4           | 0.089    | -0.787 |        | -1.409 | 0.670  | 1.140  |
| 2.99E-04           |                |          |        |        |        |        |        |
| ENSRNOG00000021128 | Kcnj11         |          | 0.255  | -0.336 |        | -1.157 | 0.360  |
| 0.805              | 2.99E-04       |          |        |        |        |        |        |
| ENSRNOG00000019752 | Slc29a1        |          | -0.142 |        | 0.744  | 1.375  | -0.664 |
| 1.138              | 3.00E-04       |          |        |        |        |        | -      |
| ENSRNOG00000013040 | Ddx31          | 0.156    | 0.232  | 0.601  | -0.351 | -0.532 |        |
| 3.02E-04           |                |          |        |        |        |        |        |
| ENSRNOG00000001825 | Pkp2           | 0.014    | -0.264 |        | -0.829 | 0.322  | 0.735  |
| 3.02E-04           |                |          |        |        |        |        |        |
| ENSRNOG00000025324 | Spire1         |          | -0.031 |        | 0.229  | 0.996  | -0.511 |
| 1.005              | 3.07E-04       |          |        |        |        |        | -      |
| ENSRNOG00000004093 | Rhot1          | -0.088   |        | 0.160  | 0.589  | -0.209 | -0.549 |
| 3.14E-04           |                |          |        |        |        |        |        |
| ENSRNOG00000023162 | Car14          | -0.151   |        | -0.313 |        | -0.932 | 0.287  |
| 0.844              | 3.16E-04       |          |        |        |        |        |        |
| ENSRNOG00000020605 | Pstk           | -0.097   |        | -0.300 |        | -0.731 | 0.251  |
| 0.612              | 3.24E-04       |          |        |        |        |        |        |
| ENSRNOG00000007632 | Mss51          | 0.813    | -0.641 |        | -2.166 | 0.633  | 1.619  |
| 3.41E-04           |                |          |        |        |        |        |        |
| ENSRNOG00000050630 | RGD1565368     | 0.285    | -0.232 |        | -1.297 | 0.290  |        |
| 1.019              | 3.45E-04       |          |        |        |        |        |        |
| ENSRNOG00000011145 | Crhr2          | 0.498    | 0.742  | 1.546  | -0.676 | -1.576 |        |
| 3.45E-04           |                |          |        |        |        |        |        |
| ENSRNOG00000052831 | AABR07040629.1 |          | 0.737  | 0.822  | 1.456  | -0.717 | -      |
| 1.683              | 3.45E-04       |          |        |        |        |        |        |

|                     |                |        |        |        |        |        |
|---------------------|----------------|--------|--------|--------|--------|--------|
| ENSRNOG00000025781  | Sec31b         | 0.104  | -0.282 | -1.233 | 0.310  |        |
| 0.909               |                |        |        |        |        |        |
| 3.60E-04            |                |        |        |        |        |        |
| ENSRNOG00000046439  | Vps37c         | -0.029 | 0.558  | 0.906  | -0.482 | -      |
| 0.742               |                |        |        |        |        |        |
| 3.62E-04            |                |        |        |        |        |        |
| ENSRNOG00000004820  | Sarl1b         | 0.434  | -0.595 | -1.481 | 0.512  | 1.115  |
| 3.63E-04            |                |        |        |        |        |        |
| ENSRNOG00000001431  | Rasa4          | -0.054 | -0.165 | -0.705 | 0.348  |        |
| 0.746               |                |        |        |        |        |        |
| 3.63E-04            |                |        |        |        |        |        |
| ENSRNOG00000007541  | Fhl3           | 0.019  | -0.208 | -1.118 | 0.378  | 1.057  |
| 3.64E-04            |                |        |        |        |        |        |
| ENSRNOG000000052236 | AABR07004992.1 | 0.078  | -0.388 | -1.068 |        |        |
| 0.334               |                |        |        |        |        |        |
| 0.802               |                |        |        |        |        |        |
| 3.64E-04            |                |        |        |        |        |        |
| ENSRNOG00000002418  | Tgfb2          | -0.107 | 0.589  | 0.848  | -0.743 | -0.978 |
| 3.64E-04            |                |        |        |        |        |        |
| ENSRNOG000000060021 | Txlnb          | -0.034 | -0.287 | -0.855 | 0.261  |        |
| 0.728               |                |        |        |        |        |        |
| 3.81E-04            |                |        |        |        |        |        |
| ENSRNOG00000000974  | Zfp358         | 0.303  | -0.405 | -1.165 | 0.370  |        |
| 0.848               |                |        |        |        |        |        |
| 3.82E-04            |                |        |        |        |        |        |
| ENSRNOG000000020372 | Hdac4          | -0.087 | 1.356  | 1.610  | -1.271 | -1.262 |
| 3.82E-04            |                |        |        |        |        |        |
| ENSRNOG00000001130  | Nos1           | 0.194  | -0.305 | -2.006 | 0.330  | 1.598  |
| 3.92E-04            |                |        |        |        |        |        |
| ENSRNOG00000001422  | Col26a1        | 1.093  | 0.652  | 2.009  | -1.761 | -2.677 |
| 3.93E-04            |                |        |        |        |        |        |
| ENSRNOG00000007323  | Ric8b          | -0.035 | -0.163 | -0.544 | 0.180  |        |
| 0.506               |                |        |        |        |        |        |
| 3.93E-04            |                |        |        |        |        |        |
| ENSRNOG00000011306  | Myod1          | 0.487  | 0.582  | 1.281  | -0.477 | -1.402 |
| 3.93E-04            |                |        |        |        |        |        |
| ENSRNOG000000048651 | Nrtn           | -0.916 | -0.873 | -1.708 | 1.453  |        |
| 2.184               |                |        |        |        |        |        |
| 4.14E-04            |                |        |        |        |        |        |
| ENSRNOG00000012536  | Sgms1          | 0.178  | -0.277 | -0.796 | 0.217  | 0.721  |
| 4.14E-04            |                |        |        |        |        |        |
| ENSRNOG000000055226 | Dab2ip         | 0.056  | -0.139 | -0.757 | 0.134  |        |
| 0.603               |                |        |        |        |        |        |
| 4.14E-04            |                |        |        |        |        |        |
| ENSRNOG00000011543  | Fam118b        | -0.208 | -0.332 | -0.584 |        |        |
| 0.265               |                |        |        |        |        |        |
| 0.537               |                |        |        |        |        |        |
| 4.14E-04            |                |        |        |        |        |        |
| ENSRNOG00000012601  | Leprotl1       | 0.124  | 0.053  | 0.331  | -0.197 | -0.435 |
| 4.14E-04            |                |        |        |        |        |        |
| ENSRNOG00000015192  | Mrps5          | -0.107 | -0.214 | -0.623 | 0.226  |        |
| 0.562               |                |        |        |        |        |        |
| 4.24E-04            |                |        |        |        |        |        |
| ENSRNOG00000003388  | Cenpf          | 0.700  | 0.925  | 1.932  | -1.649 | -2.557 |
| 4.36E-04            |                |        |        |        |        |        |
| ENSRNOG000000020812 | Gys1           | -0.164 | -0.312 | -0.972 | 0.262  |        |
| 0.804               |                |        |        |        |        |        |
| 4.46E-04            |                |        |        |        |        |        |
| ENSRNOG000000037247 | Rras           | 0.009  | 0.286  | 0.867  | -0.207 | -0.670 |
| 4.70E-04            |                |        |        |        |        |        |
| ENSRNOG000000008362 | Zfp775         | -0.158 | -0.136 | -0.566 |        |        |
| 0.223               |                |        |        |        |        |        |
| 0.526               |                |        |        |        |        |        |
| 4.74E-04            |                |        |        |        |        |        |
| ENSRNOG00000003583  | Smyd2          | 0.443  | -0.413 | -1.141 | 0.482  | 0.814  |
| 5.07E-04            |                |        |        |        |        |        |
| ENSRNOG00000004757  | Tmem158        | -0.319 | 3.298  | 4.895  | -2.760 | -      |
| 3.445               |                |        |        |        |        |        |
| 5.07E-04            |                |        |        |        |        |        |
| ENSRNOG00000016043  | Aqp4           | 0.357  | -1.316 | -2.065 | 1.250  | 1.994  |
| 5.11E-04            |                |        |        |        |        |        |

|                      |                |        |        |        |        |        |
|----------------------|----------------|--------|--------|--------|--------|--------|
| ENSRNOG00000020308   | Ech1           | -0.221 | -0.296 | -0.454 | 0.351  |        |
| 0.823 5.64E-04       |                |        |        |        |        |        |
| ENSRNOG00000018404   | Aars           | -0.048 | -0.135 | -0.512 | 0.158  |        |
| 0.459 5.84E-04       |                |        |        |        |        |        |
| ENSRNOG00000003847   | Gid4           | 0.178  | -0.361 | -0.886 | 0.242  | 0.584  |
| 5.85E-04             |                |        |        |        |        |        |
| ENSRNOG00000052398   | AABR07042802.1 | 0.627  | 0.267  | 2.505  | -1.100 | -      |
| 3.529 5.85E-04       |                |        |        |        |        |        |
| ENSRNOG00000013057   | Prc1           | 0.581  | 0.720  | 1.919  | -1.350 | -2.302 |
| 5.88E-04             |                |        |        |        |        |        |
| ENSRNOG00000014119   | Farsb          | -0.062 | 0.540  | 0.963  | -0.542 | -0.849 |
| 6.00E-04             |                |        |        |        |        |        |
| ENSRNOG00000016010   | Mul1           | 0.066  | -0.320 | -0.908 | 0.293  | 0.616  |
| 6.04E-04             |                |        |        |        |        |        |
| ENSRNOG00000010257   | Cuedc1         | 0.166  | -0.235 | -0.849 | 0.286  |        |
| 0.666 6.06E-04       |                |        |        |        |        |        |
| ENSRNOG00000019290   | Pskh1          | 0.032  | -0.145 | -0.670 | 0.186  | 0.533  |
| 6.06E-04             |                |        |        |        |        |        |
| ENSRNOG00000018106   | Neu3           | 0.143  | -0.512 | -1.169 | 0.427  | 0.879  |
| 6.12E-04             |                |        |        |        |        |        |
| ENSRNOG00000020027   | Arhgef2        | -0.013 | 0.382  | 0.986  | -0.323 | -      |
| 0.712 6.19E-04       |                |        |        |        |        |        |
| ENSRNOG00000007896   | Klhl38         | 0.006  | -0.345 | -1.082 | 0.241  |        |
| 0.884 6.22E-04       |                |        |        |        |        |        |
| ENSRNOG00000009425   | Fgf7           | 0.278  | 0.623  | 1.304  | -0.659 | -1.175 |
| 6.22E-04             |                |        |        |        |        |        |
| ENSRNOG00000054978   | Hist1h1c       | 0.123  | 0.079  | 0.399  | -0.309 | -0.586 |
| 6.25E-04             |                |        |        |        |        |        |
| ENSRNOG00000028910   | RGD1565536     | -0.215 | 0.061  | -0.471 | 0.082  |        |
| 0.680 6.44E-04       |                |        |        |        |        |        |
| ENSRNOG00000020828   | Pde4a          | -0.040 | -0.598 | -1.704 | 0.649  |        |
| 1.200 6.50E-04       |                |        |        |        |        |        |
| ENSRNOG00000011622   | Echdc1         | -0.206 | -0.230 | -0.512 |        |        |
| 0.306 0.618 6.69E-04 |                |        |        |        |        |        |
| ENSRNOG00000004377   | Lpin1          | 0.022  | -0.499 | -1.685 | 0.345  | 1.208  |
| 6.86E-04             |                |        |        |        |        |        |
| ENSRNOG00000019482   | Gnao1          | -0.294 | -0.143 | -0.848 | 0.289  |        |
| 0.991 6.86E-04       |                |        |        |        |        |        |
| ENSRNOG00000057683   | AABR07027212.1 | -0.086 | -0.326 | -0.898 |        |        |
| 0.235 0.922 6.86E-04 |                |        |        |        |        |        |
| ENSRNOG00000009536   | Pgp            | -0.050 | -0.409 | -1.282 | 0.307  |        |
| 0.921 6.86E-04       |                |        |        |        |        |        |
| ENSRNOG00000019036   | Ldhd           | -0.149 | -0.377 | -0.981 | 0.347  |        |
| 0.890 6.86E-04       |                |        |        |        |        |        |
| ENSRNOG00000048025   | Cstf2          | -0.109 | 0.181  | 0.542  | -0.298 | -0.627 |
| 6.86E-04             |                |        |        |        |        |        |
| ENSRNOG00000055648   | Haus7          | 0.010  | 0.231  | 0.614  | -0.221 | -0.671 |
| 6.86E-04             |                |        |        |        |        |        |
| ENSRNOG00000011488   | Sergef         | -0.148 | 0.497  | 1.025  | -0.404 | -      |
| 1.039 6.86E-04       |                |        |        |        |        |        |
| ENSRNOG00000033567   | Musk           | -0.246 | 2.006  | 2.772  | -1.575 | -1.969 |
| 6.86E-04             |                |        |        |        |        |        |
| ENSRNOG00000055171   | AABR07048040.1 | -0.203 | 0.935  | 3.653  | -0.301 |        |
| -3.117 6.86E-04      |                |        |        |        |        |        |



|                      |               |                   |             |        |        |
|----------------------|---------------|-------------------|-------------|--------|--------|
| ENSRNOG00000015911   | Lrp5          | -0.093            | -0.099      | -0.550 | 0.283  |
| 0.657 6.93E-04       |               |                   |             |        |        |
| ENSRNOG00000016684   | Wnk2          | -0.243            | -0.032      | -0.877 | 0.133  |
| 0.907 6.95E-04       |               |                   |             |        |        |
| ENSRNOG00000003310   | Tmem63a       | -0.114            | -0.003      | -0.199 |        |
| 0.069 0.470 7.14E-04 |               |                   |             |        |        |
| ENSRNOG00000017123   | B2m           | -0.130            | 0.792 1.530 | -0.523 | -0.835 |
| 7.17E-04             |               |                   |             |        |        |
| ENSRNOG00000009045   | Alg6          | 0.075 0.550 1.145 | -0.785      | -1.044 |        |
| 7.17E-04             |               |                   |             |        |        |
| ENSRNOG00000001584   | Map3k7c1      | -0.453            | 0.468 1.260 | -0.519 | -      |
| 1.418 7.44E-04       |               |                   |             |        |        |
| ENSRNOG000000031431  | Cdca8         | 0.488 0.594 1.109 | -1.016      | -1.392 |        |
| 7.78E-04             |               |                   |             |        |        |
| ENSRNOG00000003302   | Flcn          | -0.046            | -0.220      | -0.660 | 0.297  |
| 0.533 7.78E-04       |               |                   |             |        |        |
| ENSRNOG000000033090  | Ltbp1         | 0.309 0.857 1.469 | -0.600      | -1.025 |        |
| 7.86E-04             |               |                   |             |        |        |
| ENSRNOG00000000774   | Gabbr1        | -0.073            | 0.366 0.549 | -0.354 | -      |
| 0.626 7.89E-04       |               |                   |             |        |        |
| ENSRNOG000000005464  | Lgals1        | 0.201 -0.489      | -1.038      | 0.338  |        |
| 0.723 7.96E-04       |               |                   |             |        |        |
| ENSRNOG000000004542  | Ttc8          | 0.035 0.009 0.858 | -0.325      | -1.009 |        |
| 7.96E-04             |               |                   |             |        |        |
| ENSRNOG000000051306  | Rn60_1_2682.1 | -0.183            | -0.369      | -0.853 |        |
| 0.309 0.849 7.98E-04 |               |                   |             |        |        |
| ENSRNOG000000020607  | Bckdha        | -0.350            | -0.230      | -0.552 |        |
| 0.322 0.676 7.98E-04 |               |                   |             |        |        |
| ENSRNOG000000043199  | Bves          | 0.295 0.342 0.320 | -0.393      | -0.537 |        |
| 7.98E-04             |               |                   |             |        |        |
| ENSRNOG000000014698  | Chrnbl        | 0.166 0.444 0.515 | -0.375      | -0.619 |        |
| 7.98E-04             |               |                   |             |        |        |
| ENSRNOG000000011631  | Fst           | -0.183            | 1.257 2.298 | -1.108 | -1.799 |
| 7.98E-04             |               |                   |             |        |        |
| ENSRNOG000000022957  | Ctxn3         | -0.658            | 3.630 4.423 | -3.335 | -3.111 |
| 7.98E-04             |               |                   |             |        |        |
| ENSRNOG000000008911  | Draxin        | 0.424 2.364 4.024 | -2.640      | -4.127 |        |
| 7.98E-04             |               |                   |             |        |        |
| ENSRNOG000000007069  | Adhfe1        | 0.320 -0.346      | -1.072      | 0.267  |        |
| 1.042 8.11E-04       |               |                   |             |        |        |
| ENSRNOG000000027622  | Slc35e3       | 0.068 0.391 0.867 | -0.386      | -0.613 |        |
| 8.14E-04             |               |                   |             |        |        |
| ENSRNOG000000006365  | Asb15         | -0.298            | -0.518      | -1.400 | 0.448  |
| 1.047 8.16E-04       |               |                   |             |        |        |
| ENSRNOG000000027434  | Fitm2         | -0.229            | -0.700      | -1.315 | 0.537  |
| 1.022 8.22E-04       |               |                   |             |        |        |
| ENSRNOG000000016763  | Fgfr4         | 0.404 0.412 0.813 | -0.470      | -0.856 |        |
| 8.22E-04             |               |                   |             |        |        |
| ENSRNOG000000038883  | LOC294154     | 0.120 -0.387      | -0.945      | 0.319  |        |
| 0.629 8.29E-04       |               |                   |             |        |        |
| ENSRNOG000000004162  | Pfkfb2        | -0.402            | -0.205      | -0.451 |        |
| 0.257 0.650 8.30E-04 |               |                   |             |        |        |
| ENSRNOG000000059659  | Zfand3        | 0.300 -0.329      | -0.784      | 0.377  |        |
| 0.527 8.30E-04       |               |                   |             |        |        |

|                                            |                |        |        |        |        |        |
|--------------------------------------------|----------------|--------|--------|--------|--------|--------|
| ENSRNOG00000009884<br>0.865 8.50E-04       | Lgals1         | -0.002 | 0.534  | 0.932  | -0.420 | -      |
| ENSRNOG00000059957<br>0.821 8.54E-04       | AABR07021734.2 | 0.176  | 0.170  | 0.553  | -0.288 | -      |
| ENSRNOG00000014718<br>8.66E-04             | Acls13         | 0.381  | 0.343  | 0.568  | -0.410 | -1.013 |
| ENSRNOG00000004537<br>8.86E-04             | Rxrg           | 0.198  | -0.458 | -1.649 | 0.443  | 1.060  |
| ENSRNOG00000027731<br>2.307 8.92E-04       | Ubxn10         | 0.060  | -0.973 | -2.583 | 0.866  |        |
| ENSRNOG00000017637<br>9.08E-04             | Fbp2           | 0.241  | -0.281 | -1.453 | 0.466  | 1.336  |
| ENSRNOG00000046280<br>9.08E-04             | Tceal5         | 0.741  | 0.820  | 1.274  | -0.718 | -1.396 |
| ENSRNOG00000003563<br>9.17E-04             | Blmh           | 0.051  | 0.074  | 0.243  | -0.124 | -0.368 |
| ENSRNOG00000026143<br>9.19E-04             | Ckap21         | 0.718  | 0.310  | 1.519  | -1.461 | -2.684 |
| ENSRNOG00000022727<br>0.463 9.23E-04       | Tmem127        | -0.037 | 0.214  | 0.444  | -0.258 | -      |
| ENSRNOG00000017233<br>0.207 0.621 9.28E-04 | Mmachc         | -0.244 | -0.274 | -0.710 |        |        |
| ENSRNOG00000053047<br>9.28E-04             | Top2a          | 0.155  | 0.908  | 1.865  | -1.033 | -2.137 |
| ENSRNOG00000005960<br>9.35E-04             | RGD1311744     | 0.132  | 0.706  | 1.899  | -0.958 | -1.465 |
| ENSRNOG00000025518<br>0.782 1.702 9.40E-04 | Lrrc16b        | -0.955 | -0.106 | -0.830 |        |        |
| ENSRNOG00000012481<br>0.792 9.40E-04       | Ppm1j          | -0.094 | -0.354 | -1.097 | 0.286  |        |
| ENSRNOG00000011589<br>9.40E-04             | Camk2d         | 0.565  | 0.172  | 0.327  | -0.380 | -0.772 |
| ENSRNOG00000029336<br>0.693 9.48E-04       | Zfp180         | 0.116  | -0.348 | -0.793 | 0.378  |        |
| ENSRNOG00000001769<br>9.48E-04             | Tnk2           | 0.041  | -0.304 | -1.152 | 0.455  | 0.991  |
| ENSRNOG00000055524<br>0.473 9.59E-04       | Trip10         | -0.005 | 0.009  | -0.378 | 0.138  |        |
| ENSRNOG00000013452<br>9.60E-04             | Rcn1           | -0.048 | 0.418  | 1.095  | -0.545 | -0.846 |
| ENSRNOG00000002026<br>0.239 0.742 9.62E-04 | Dnajc28        | -0.105 | -0.349 | -0.821 |        |        |
| ENSRNOG00000012524<br>9.64E-04             | Zfp91          | 0.059  | -0.474 | -0.889 | 0.375  | 0.648  |
| ENSRNOG00000002516<br>0.425 9.82E-04       | Mtm1           | -0.037 | -0.094 | -0.457 | 0.109  |        |
| ENSRNOG00000020244<br>1.503 9.86E-04       | Perm1          | -0.487 | -0.672 | -1.614 | 0.602  |        |
| ENSRNOG00000016829<br>0.416 0.862 9.99E-04 | Isoc2b         | -0.271 | -0.497 | -0.914 |        |        |
| ENSRNOG00000012868<br>1.01E-03             | Uaca           | 0.096  | -0.103 | -0.569 | 0.165  | 0.558  |
| ENSRNOG00000059013<br>1.058 1.01E-03       | AABR07060519.1 | 0.169  | 0.171  | -0.572 | 0.678  |        |

|                     |          |          |        |        |        |        |
|---------------------|----------|----------|--------|--------|--------|--------|
| ENSRNOG00000038597  | Dlg1     | 0.115    | -0.197 | -0.629 | 0.256  | 0.594  |
| 1.01E-03            |          |          |        |        |        |        |
| ENSRNOG00000001055  | Rilpl1   |          | -0.019 | -0.357 | -0.807 |        |
| 0.348               | 0.579    | 1.01E-03 |        |        |        |        |
| ENSRNOG000000052343 | Eif4e    | -0.079   |        | -0.265 | -0.555 | 0.182  |
| 0.493               | 1.01E-03 |          |        |        |        |        |
| ENSRNOG000000032664 | RT1-O1   | 1.609    | 3.001  | 3.829  | -2.568 | -3.094 |
| 1.01E-03            |          |          |        |        |        |        |
| ENSRNOG000000042536 | Pde4d    | -0.032   |        | -0.317 | -1.343 | 0.291  |
| 1.157               | 1.02E-03 |          |        |        |        |        |
| ENSRNOG000000017752 | Mccc2    | -0.350   |        | -0.153 | -0.615 | 0.107  |
| 0.559               | 1.02E-03 |          |        |        |        |        |
| ENSRNOG000000016090 | Mtmr10   |          | -0.035 | -0.323 | -0.551 |        |
| 0.235               | 0.475    | 1.03E-03 |        |        |        |        |
| ENSRNOG000000060154 | Ddx23    | 0.200    | -0.283 | -0.775 | 0.363  | 0.588  |
| 1.06E-03            |          |          |        |        |        |        |
| ENSRNOG000000015986 | Rassf8   |          | -0.103 | -0.202 | -0.652 |        |
| 0.190               | 0.500    | 1.06E-03 |        |        |        |        |
| ENSRNOG000000016054 | Tab2     | 0.143    | -0.370 | -0.842 | 0.255  | 0.563  |
| 1.06E-03            |          |          |        |        |        |        |
| ENSRNOG000000019645 | Osbp2    | -0.499   |        | -0.118 | -0.653 | 0.314  |
| 1.132               | 1.07E-03 |          |        |        |        |        |
| ENSRNOG000000017117 | Ybx2     | 0.090    | -0.819 | -1.483 | 0.802  | 1.089  |
| 1.07E-03            |          |          |        |        |        |        |
| ENSRNOG000000011603 | Cab39l   | 0.161    | -0.334 | -0.654 | 0.176  |        |
| 0.501               | 1.08E-03 |          |        |        |        |        |
| ENSRNOG000000048169 | Tuba8    | -0.002   |        | -0.366 | -1.675 | 0.475  |
| 1.139               | 1.09E-03 |          |        |        |        |        |
| ENSRNOG000000000954 | Rpo1-3   | 0.135    | 0.226  | 0.598  | -0.298 | -0.665 |
| 1.09E-03            |          |          |        |        |        |        |
| ENSRNOG000000022392 | Hspb8    | -0.030   |        | 0.560  | 1.089  | -0.510 |
| 1.10E-03            |          |          |        |        |        |        |
| ENSRNOG000000015029 | Dbt      | -0.059   |        | -0.099 | -0.471 | 0.103  |
| 0.623               | 1.10E-03 |          |        |        |        |        |
| ENSRNOG000000029441 | Klhl2    | -0.053   |        | 0.449  | 1.252  | -0.444 |
| 1.11E-03            |          |          |        |        |        |        |
| ENSRNOG000000042915 | Mxra7    | -0.384   |        | 0.789  | 1.988  | -1.013 |
| 1.11E-03            |          |          |        |        |        |        |
| ENSRNOG000000005916 | Ppm1a    | 0.149    | -0.332 | -0.532 | 0.256  | 0.509  |
| 1.15E-03            |          |          |        |        |        |        |
| ENSRNOG000000021025 | Ppp2r5b  |          | -0.039 | -0.173 | -0.446 |        |
| 0.241               | 0.441    | 1.15E-03 |        |        |        |        |
| ENSRNOG000000017816 | Pde6a    | -0.216   |        | 2.659  | 4.313  | -2.658 |
| 1.16E-03            |          |          |        |        |        |        |
| ENSRNOG000000002840 | Atp5b    | -0.227   |        | -0.285 | -0.780 | 0.276  |
| 0.687               | 1.17E-03 |          |        |        |        |        |
| ENSRNOG000000025145 | Rmdn1    | -0.252   |        | -0.466 | -0.857 | 0.383  |
| 0.756               | 1.19E-03 |          |        |        |        |        |
| ENSRNOG000000033361 | Slc39a5  |          | -0.203 | -0.227 | -0.709 |        |
| 0.172               | 0.698    | 1.19E-03 |        |        |        |        |
| ENSRNOG000000010725 | Cpa1     | 0.329    | 0.018  | 0.559  | -0.553 | -1.197 |
| 1.19E-03            |          |          |        |        |        |        |
| ENSRNOG000000059840 | Unc5a    | 0.719    | -0.153 | -1.639 | 0.622  | 1.723  |
| 1.19E-03            |          |          |        |        |        |        |

|                    |                |          |        |        |        |        |
|--------------------|----------------|----------|--------|--------|--------|--------|
| ENSRNOG00000014130 | LOC100362620   | 0.651    | 1.567  | 2.391  | -1.460 | -      |
| 1.937              | 1.21E-03       |          |        |        |        |        |
| ENSRNOG00000006802 | Lrrn1          | 0.146    | 0.280  | 1.662  | -0.740 | -1.797 |
| 1.22E-03           |                |          |        |        |        |        |
| ENSRNOG00000054063 | LOC100910872   | -0.249   |        | -0.185 |        | -0.510 |
| 0.232              | 0.567          | 1.22E-03 |        |        |        |        |
| ENSRNOG00000015225 | Gramd3         | -0.114   |        | 0.396  | 0.917  | -0.388 |
| 0.759              | 1.22E-03       |          |        |        |        |        |
| ENSRNOG00000019048 | Sod2           | -0.301   |        | -0.302 |        | -0.742 |
| 0.627              | 1.24E-03       |          |        |        |        | 0.282  |
| ENSRNOG00000004534 | Spdya          | -0.159   |        | -0.326 |        | -1.050 |
| 1.048              | 1.25E-03       |          |        |        |        | 0.491  |
| ENSRNOG00000011648 | Aqp1           | -0.123   |        | -0.318 |        | -0.586 |
| 0.709              | 1.25E-03       |          |        |        |        | 0.368  |
| ENSRNOG00000004834 | Llgl2          | -0.111   |        | 0.010  | -1.104 | 0.254  |
| 1.25E-03           |                |          |        |        |        | 1.069  |
| ENSRNOG00000037957 | Aifm3          | -0.187   |        | 0.029  | -0.700 | 0.664  |
| 1.27E-03           |                |          |        |        |        | 1.176  |
| ENSRNOG00000012091 | Ppa2           | -0.166   |        | -0.437 |        | -0.817 |
| 0.650              | 1.27E-03       |          |        |        |        | 0.375  |
| ENSRNOG00000028357 | Lrrc14b        | 0.137    |        | -0.288 |        | -0.992 |
| 0.638              | 1.27E-03       |          |        |        |        | 0.253  |
| ENSRNOG00000049531 | Usp19          | -0.054   |        | -0.191 |        | -0.677 |
| 0.477              | 1.27E-03       |          |        |        |        | 0.197  |
| ENSRNOG00000006865 | Laptm4a        | 0.155    | 0.060  | 0.256  | -0.108 | -0.331 |
| 1.27E-03           |                |          |        |        |        |        |
| ENSRNOG00000032929 | Incenp         | 0.166    | 0.101  | 0.196  | -0.162 | -0.787 |
| 1.27E-03           |                |          |        |        |        |        |
| ENSRNOG00000015582 | Me2            | -0.062   |        | 0.455  | 1.333  | -0.310 |
| 1.27E-03           |                |          |        |        |        | -0.871 |
| ENSRNOG00000007483 | Ccnf           | 0.639    | 0.935  | 1.861  | -1.416 | -2.585 |
| 1.27E-03           |                |          |        |        |        |        |
| ENSRNOG00000024128 | Aco2           | -0.152   |        | -0.269 |        | -0.864 |
| 0.689              | 1.27E-03       |          |        |        |        | 0.208  |
| ENSRNOG00000014368 | Eif4g3         | -0.014   |        | -0.087 |        | -0.454 |
| 0.127              | 0.496          | 1.27E-03 |        |        |        |        |
| ENSRNOG00000030515 | Nfasc          | -0.683   |        | -0.030 |        | -1.093 |
| 1.308              | 1.28E-03       |          |        |        |        | 0.594  |
| ENSRNOG00000010543 | Srpr           | -0.136   |        | -0.177 |        | -0.634 |
| 0.462              | 1.28E-03       |          |        |        |        | 0.180  |
| ENSRNOG00000030225 | Clpx           | -0.249   |        | -0.262 |        | -0.454 |
| 0.579              | 1.32E-03       |          |        |        |        | 0.188  |
| ENSRNOG00000053904 | AABR07022113.1 | -0.135   |        | -0.991 |        | -3.538 |
| 0.835              | 2.403          | 1.32E-03 |        |        |        |        |
| ENSRNOG00000008592 | Barx2          | -0.222   |        | 0.149  | -0.990 | 0.660  |
| 1.32E-03           |                |          |        |        |        | 1.361  |
| ENSRNOG00000025415 | Mettl11b       | -0.844   |        | -0.421 |        | -1.299 |
| 0.400              | 1.171          | 1.32E-03 |        |        |        |        |
| ENSRNOG00000007133 | Plxnb2         | 0.237    | 0.313  | 0.534  | -0.311 | -0.553 |
| 1.32E-03           |                |          |        |        |        |        |
| ENSRNOG00000018841 | Sox8           | 0.321    | -0.051 | 1.063  | -0.546 | -2.079 |
| 1.32E-03           |                |          |        |        |        |        |
| ENSRNOG00000033335 | Cenpi          | -0.218   |        | -0.044 | 1.142  | 0.099  |
| 1.32E-03           |                |          |        |        |        | -2.206 |

|                                            |                |        |        |        |        |               |
|--------------------------------------------|----------------|--------|--------|--------|--------|---------------|
| ENSRNOG00000061934<br>3.524 1.32E-03       | AABR07044836.1 | 0.386  | 1.673  | 3.887  | -1.363 | -             |
| ENSRNOG00000030963<br>0.940 1.33E-03       | LOC685186      | 0.300  | -0.266 |        | -1.250 | 0.277         |
| ENSRNOG00000016484<br>0.632 1.33E-03       | Gstk1          | -0.135 | -0.229 |        | -0.536 | 0.278         |
| ENSRNOG00000007164<br>1.33E-03             | Cln6           | 0.220  | 0.005  | 0.329  | -0.353 | -0.657        |
| ENSRNOG00000011448<br>1.35E-03             | Eri1           | 0.104  | 0.126  | 0.512  | -0.231 | -0.560        |
| ENSRNOG00000022699<br>3.217 1.36E-03       | Rn60_10_0644.1 | 0.161  | 1.501  | 3.278  | -1.218 | -             |
| ENSRNOG00000009427<br>1.38E-03             | Tbx21          | 1.055  | 0.994  | 1.416  | -0.999 | -1.738        |
| ENSRNOG00000000632<br>1.38E-03             | Cdk1           | 0.669  | 1.065  | 2.292  | -1.394 | -2.469        |
| ENSRNOG00000013211<br>0.694 1.38E-03       | Chchd3         | 0.010  | -0.481 |        | -0.906 | 0.414         |
| ENSRNOG00000000047<br>1.39E-03             | Cd82           | -0.049 | 0.424  | 1.156  | -0.272 | -0.761        |
| ENSRNOG00000014948<br>0.176 1.152 1.41E-03 | Osgin1         | -0.102 |        | -0.104 |        | -0.508        |
| ENSRNOG00000042634<br>1.41E-03             | Serpina12      | 0.383  | 2.849  | 4.219  | -1.985 | -2.692        |
| ENSRNOG00000027383<br>1.44E-03             | Sntn           | 0.313  | 1.653  | 3.614  | -2.150 | -3.481        |
| ENSRNOG00000010415<br>0.548 1.44E-03       | Atxn7l4        | 0.045  | -0.290 |        | -0.722 | 0.275         |
| ENSRNOG00000019181<br>1.45E-03             | Synpo          | 0.016  | -0.376 |        | -0.943 | 0.303 0.839   |
| ENSRNOG00000012759<br>1.47E-03             | Col19a1        | 0.265  | 2.176  | 3.839  | -2.876 | -3.567        |
| ENSRNOG00000008056<br>1.142 1.47E-03       | Ankrd9         | 0.167  | -0.413 |        | -1.684 | 0.462         |
| ENSRNOG00000020202<br>0.610 1.52E-03       | Asrgl1         | 0.392  | -0.299 |        | -0.723 | 0.269         |
| ENSRNOG00000053468<br>0.778 1.52E-03       | Tubalb         | -0.044 |        | 0.266  | 1.008  | -0.340 -      |
| ENSRNOG00000050473<br>1.52E-03             | Rps27l         | 0.361  | 0.331  | 0.721  | -0.348 | -0.836        |
| ENSRNOG00000019372<br>0.748 1.53E-03       | Pc             | -0.056 | -0.209 |        | -0.906 | 0.316         |
| ENSRNOG00000004640<br>0.977 1.56E-03       | Mtfp1          | -0.312 | -0.411 |        | -1.204 | 0.307         |
| ENSRNOG00000015829<br>1.56E-03             | Trpm1          | 0.079  | -0.233 |        | -1.910 | 0.574 1.489   |
| ENSRNOG00000000920<br>1.57E-03             | Phkg1          | 0.229  | -0.336 |        | -1.579 | 0.383 1.119   |
| ENSRNOG00000020371<br>1.57E-03             | Pgap2          | 0.007  | 0.173  | 0.365  | -0.208 | -0.379        |
| ENSRNOG00000034190<br>1.57E-03             | Ighm           | -0.192 |        | 0.604  | 1.837  | -0.507 -1.576 |
| ENSRNOG00000038366<br>0.520 1.58E-03       | Larp1b         | 0.005  | -0.273 |        | -0.759 | 0.183         |

|                      |            |        |        |        |               |
|----------------------|------------|--------|--------|--------|---------------|
| ENSRNOG00000022922   | Slc25a12   | -0.144 | -0.328 | -0.961 |               |
| 0.235 0.751 1.58E-03 |            |        |        |        |               |
| ENSRNOG00000006068   | Tmem117    | 0.176  | 0.091  | 0.311  | -0.151 -0.587 |
| 1.58E-03             |            |        |        |        |               |
| ENSRNOG00000003802   | Pttg1      | 0.587  | 0.430  | 1.573  | -0.568 -2.269 |
| 1.58E-03             |            |        |        |        |               |
| ENSRNOG00000018630   | Gapdh      | 0.277  | -0.245 | -1.188 | 0.269 0.915   |
| 1.58E-03             |            |        |        |        |               |
| ENSRNOG00000012014   | Fam160b2   | -0.087 | -0.227 | -0.832 |               |
| 0.214 0.611 1.58E-03 |            |        |        |        |               |
| ENSRNOG00000006030   | Ptprz1     | 0.385  | 0.044  | 0.638  | -0.731 -1.497 |
| 1.58E-03             |            |        |        |        |               |
| ENSRNOG000000061851  | Foxj3      | -0.044 | -0.255 | -0.610 | 0.170         |
| 0.452 1.66E-03       |            |        |        |        |               |
| ENSRNOG00000011425   | Ptpn3      | -0.501 | -0.466 | -1.168 | 0.463         |
| 1.181 1.68E-03       |            |        |        |        |               |
| ENSRNOG00000010800   | Hadhb      | -0.391 | -0.312 | -0.417 | 0.300         |
| 0.735 1.68E-03       |            |        |        |        |               |
| ENSRNOG00000000921   | Ubl3       | -0.038 | -0.148 | -0.264 | 0.116         |
| 0.305 1.68E-03       |            |        |        |        |               |
| ENSRNOG00000022533   | Micall2    | 0.012  | 0.913  | 1.894  | -0.762 -1.526 |
| 1.68E-03             |            |        |        |        |               |
| ENSRNOG000000059224  | Reps1      | -0.162 | 0.169  | 0.712  | -0.133 -0.635 |
| 1.70E-03             |            |        |        |        |               |
| ENSRNOG000000058003  | Spon1      | 0.313  | 0.425  | 1.477  | -0.811 -1.493 |
| 1.70E-03             |            |        |        |        |               |
| ENSRNOG00000016292   | Pdzd9      | -0.245 | -0.526 | -0.989 | 0.345         |
| 0.876 1.71E-03       |            |        |        |        |               |
| ENSRNOG00000016338   | Fam92a1    | 0.236  | -0.576 | 0.023  | -0.435 -      |
| 0.843 1.72E-03       |            |        |        |        |               |
| ENSRNOG000000049033  | Racgap1    | 0.355  | 1.048  | 1.780  | -1.166 -2.769 |
| 1.72E-03             |            |        |        |        |               |
| ENSRNOG000000020857  | Ppfia1     | -0.246 | -0.138 | -0.382 |               |
| 0.215 0.519 1.73E-03 |            |        |        |        |               |
| ENSRNOG000000057284  | Cenpb      | 0.017  | -0.199 | -0.434 | 0.223 0.384   |
| 1.73E-03             |            |        |        |        |               |
| ENSRNOG000000004518  | Cacnb1     | 0.301  | 0.383  | 0.526  | -0.288 -0.740 |
| 1.74E-03             |            |        |        |        |               |
| ENSRNOG00000017146   | RGD1560225 | -0.097 | -0.168 | -0.776 |               |
| 0.233 0.640 1.74E-03 |            |        |        |        |               |
| ENSRNOG00000019930   | Rhot2      | -0.150 | -0.119 | -0.355 | 0.147         |
| 0.405 1.75E-03       |            |        |        |        |               |
| ENSRNOG000000005877  | Lrpprc     | -0.198 | -0.268 | -0.674 |               |
| 0.205 0.616 1.76E-03 |            |        |        |        |               |
| ENSRNOG00000011659   | Alpk3      | -0.092 | -0.261 | -0.705 | 0.190         |
| 0.605 1.76E-03       |            |        |        |        |               |
| ENSRNOG000000020706  | Kcnn3      | -0.148 | 1.296  | 1.773  | -1.048 -1.107 |
| 1.77E-03             |            |        |        |        |               |
| ENSRNOG000000007955  | Timp4      | 0.015  | -0.348 | -0.775 | 0.511 0.989   |
| 1.77E-03             |            |        |        |        |               |
| ENSRNOG00000015180   | Kdm8       | 0.056  | -0.251 | -0.679 | 0.220 0.511   |
| 1.77E-03             |            |        |        |        |               |
| ENSRNOG00000016364   | Gba2       | -0.228 | -0.249 | -0.422 | 0.347         |
| 0.510 1.78E-03       |            |        |        |        |               |

|                      |                |                   |              |             |       |
|----------------------|----------------|-------------------|--------------|-------------|-------|
| ENSRNOG00000018415   | Acot13         | -0.148            | -0.460       | -1.019      |       |
| 0.378 0.824 1.81E-03 |                |                   |              |             |       |
| ENSRNOG00000014050   | Ptges2         | -0.174            | -0.269       | -0.718      |       |
| 0.280 0.589 1.82E-03 |                |                   |              |             |       |
| ENSRNOG00000054479   | Zw10           | 0.255 0.352 0.633 | -0.326       | -0.496      |       |
| 1.82E-03             |                |                   |              |             |       |
| ENSRNOG00000028623   | Agpat5         | 0.226 0.136 0.305 | -0.349       | -0.490      |       |
| 1.83E-03             |                |                   |              |             |       |
| ENSRNOG00000043128   | Armcx4         | -0.143            | 0.075 0.922  | -0.197      | -     |
| 0.814 1.83E-03       |                |                   |              |             |       |
| ENSRNOG00000013961   | Ghitm          | -0.177            | -0.256       | -0.463      | 0.246 |
| 0.497 1.84E-03       |                |                   |              |             |       |
| ENSRNOG00000012051   | Ncaph          | 0.158 0.106 1.581 | -0.177       | -2.175      |       |
| 1.84E-03             |                |                   |              |             |       |
| ENSRNOG00000052354   | Arhgef40       | -0.024            | 0.153 0.574  | -0.216      | -     |
| 0.580 1.87E-03       |                |                   |              |             |       |
| ENSRNOG00000003334   | Klhl21         | 0.264 -0.309      | -1.018       | 0.345       |       |
| 0.742 1.88E-03       |                |                   |              |             |       |
| ENSRNOG00000001653   | St3gal6        | 0.335 -0.542      | -1.027       | 0.328       |       |
| 0.696 1.88E-03       |                |                   |              |             |       |
| ENSRNOG00000015774   | Mreg           | 0.302 -0.256      | -0.623       | 0.334 0.606 |       |
| 1.88E-03             |                |                   |              |             |       |
| ENSRNOG00000056216   | Casp7          | 0.001 -0.297      | -0.590       | 0.352 0.498 |       |
| 1.88E-03             |                |                   |              |             |       |
| ENSRNOG00000010873   | Pithd1         | -0.198            | -0.134       | -0.370      |       |
| 0.233 0.475 1.88E-03 |                |                   |              |             |       |
| ENSRNOG00000016150   | Ifrd2          | 0.124 -0.136      | -0.568       | 0.276 0.462 |       |
| 1.88E-03             |                |                   |              |             |       |
| ENSRNOG00000046227   | Tprg11         | 0.058 0.215 0.545 | -0.203       | -0.478      |       |
| 1.88E-03             |                |                   |              |             |       |
| ENSRNOG00000018286   | Chrna1         | -0.832            | 2.549 4.148  | -2.599      | -     |
| 2.959 1.88E-03       |                |                   |              |             |       |
| ENSRNOG00000011881   | Slc25a15       | -0.192            | -0.272       | -0.431      |       |
| 0.388 0.588 1.88E-03 |                |                   |              |             |       |
| ENSRNOG00000002271   | Slain2         | 0.003 0.450 0.726 | -0.516       | -0.629      |       |
| 1.88E-03             |                |                   |              |             |       |
| ENSRNOG00000057072   | Slc12a3        | -0.025            | 3.254 4.393  | -3.891      | -     |
| 2.900 1.89E-03       |                |                   |              |             |       |
| ENSRNOG00000009421   | Ivd            | -0.139            | -0.240       | -0.518      | 0.223 |
| 0.618 1.91E-03       |                |                   |              |             |       |
| ENSRNOG00000003841   | Kcnh1          | -1.062            | 0.432 -1.489 | 1.273 2.206 |       |
| 1.93E-03             |                |                   |              |             |       |
| ENSRNOG00000021096   | Tmem143        | -0.211            | -0.237       | -0.668      |       |
| 0.278 0.614 1.94E-03 |                |                   |              |             |       |
| ENSRNOG00000019791   | Sipa112        | -0.055            | -0.453       | -0.944      |       |
| 0.373 0.772 1.94E-03 |                |                   |              |             |       |
| ENSRNOG00000053270   | AABR07053741.1 | -0.176            | -0.292       | -0.452      |       |
| 0.252 0.510 1.94E-03 |                |                   |              |             |       |
| ENSRNOG00000060728   | Tubal1a        | 0.039 0.016 0.694 | -0.107       | -0.741      |       |
| 1.97E-03             |                |                   |              |             |       |
| ENSRNOG00000025997   | Mrrf           | -0.216            | -0.075       | -0.224      | 0.106 |
| 0.355 1.97E-03       |                |                   |              |             |       |
| ENSRNOG00000016695   | Mmp2           | 0.298 0.283 0.991 | -0.406       | -0.942      |       |
| 1.97E-03             |                |                   |              |             |       |

|                       |              |                   |              |             |        |
|-----------------------|--------------|-------------------|--------------|-------------|--------|
| ENSRNOG00000052664    | LOC100910717 | -0.130            | -0.398       | -0.914      |        |
| 0.265 0.670 2.04E-03  |              |                   |              |             |        |
| ENSRNOG00000020596    | Atp5s1       | -0.091            | -0.155       | -0.460      |        |
| 0.149 0.419 2.05E-03  |              |                   |              |             |        |
| ENSRNOG00000028812    | Trim80       | 0.058 2.420 3.985 | -2.324       | -3.662      |        |
| 2.07E-03              |              |                   |              |             |        |
| ENSRNOG00000056697    | Kcnab1       | 0.803 0.276 0.858 | -0.268       | -1.449      |        |
| 2.09E-03              |              |                   |              |             |        |
| ENSRNOG00000038140    | Whsc1        | 0.075 0.099 0.395 | -0.432       | -0.506      |        |
| 2.10E-03              |              |                   |              |             |        |
| ENSRNOG00000050675    | Myl4         | 0.269 0.536 0.924 | -0.445       | -1.126      |        |
| 2.11E-03              |              |                   |              |             |        |
| ENSRNOG00000001710    | Abcf3        | -0.130            | -0.179       | -0.471      | 0.189  |
| 0.397 2.13E-03        |              |                   |              |             |        |
| ENSRNOG00000017993    | Abcb10       | -0.176            | -0.159       | -0.529      |        |
| 0.139 0.419 2.14E-03  |              |                   |              |             |        |
| ENSRNOG00000016509    | Usp10        | 0.000 -0.140      | -0.466       | 0.151 0.369 |        |
| 2.20E-03              |              |                   |              |             |        |
| ENSRNOG00000003242    | Gulp1        | -0.272            | 0.320 0.993  | -0.395      | -0.846 |
| 2.20E-03              |              |                   |              |             |        |
| ENSRNOG00000020164    | Ifitm10      | 0.389 0.941 1.339 | -0.694       | -1.223      |        |
| 2.20E-03              |              |                   |              |             |        |
| ENSRNOG00000042344    | Smim22       | 0.594 0.806 2.170 | -0.940       | -2.250      |        |
| 2.20E-03              |              |                   |              |             |        |
| ENSRNOG00000037801    | LOC100360238 | -0.649            | -0.347       | -1.251      |        |
| -0.337 1.542 2.21E-03 |              |                   |              |             |        |
| ENSRNOG00000007459    | Pcnx         | -0.037            | -0.013       | -0.393      | 0.203  |
| 0.553 2.23E-03        |              |                   |              |             |        |
| ENSRNOG00000000804    | Mrps18b      | -0.117            | -0.245       | -0.481      |        |
| 0.317 0.513 2.23E-03  |              |                   |              |             |        |
| ENSRNOG00000004595    | Pou6f1       | -0.055            | 0.097 -0.382 | 0.297       |        |
| 0.566 2.24E-03        |              |                   |              |             |        |
| ENSRNOG00000038625    | Sbk2         | -0.690            | -0.870       | -1.756      | 0.791  |
| 1.834 2.27E-03        |              |                   |              |             |        |
| ENSRNOG00000005987    | Suox         | -0.221            | -0.435       | -0.590      | 0.367  |
| 0.708 2.27E-03        |              |                   |              |             |        |
| ENSRNOG00000008797    | Tmpo         | 0.029 -0.178      | -0.464       | 0.221 0.449 |        |
| 2.28E-03              |              |                   |              |             |        |
| ENSRNOG00000025167    | Sema4b       | 0.122 0.384 0.844 | -0.357       | -0.680      |        |
| 2.30E-03              |              |                   |              |             |        |
| ENSRNOG00000004471    | Polr3h       | 0.242 0.302 0.647 | -0.111       | -0.566      |        |
| 2.32E-03              |              |                   |              |             |        |
| ENSRNOG00000025295    | Mavs         | -0.567            | -0.376       | -0.803      | 0.377  |
| 0.823 2.32E-03        |              |                   |              |             |        |
| ENSRNOG00000019063    | Fbxo38       | 0.070 0.160 0.226 | -0.199       | -0.317      |        |
| 2.33E-03              |              |                   |              |             |        |
| ENSRNOG00000009289    | Galk2        | -0.009            | 0.219 0.620  | -0.216      | -0.600 |
| 2.33E-03              |              |                   |              |             |        |
| ENSRNOG00000009863    | Prrt3        | 0.431 0.766 1.638 | -0.343       | -1.411      |        |
| 2.33E-03              |              |                   |              |             |        |
| ENSRNOG00000005064    | Ube2b        | 0.079 -0.182      | -0.426       | 0.174 0.412 |        |
| 2.34E-03              |              |                   |              |             |        |
| ENSRNOG00000003777    | Chrne        | 0.387 0.735 1.347 | -1.405       | -1.547      |        |
| 2.34E-03              |              |                   |              |             |        |



|                      |                |        |        |        |        |
|----------------------|----------------|--------|--------|--------|--------|
| ENSRNOG00000009431   | Tbc1d4         | -0.099 | -0.401 | -1.240 |        |
| 0.349 1.015 2.37E-03 |                |        |        |        |        |
| ENSRNOG00000001276   | Pcnt           | -0.158 | -0.150 | -0.679 | 0.227  |
| 0.697 2.38E-03       |                |        |        |        |        |
| ENSRNOG00000008040   | Fam64a         | 1.122  | 0.744  | 2.633  | -1.869 |
| 2.41E-03             |                |        |        |        |        |
| ENSRNOG00000000321   | Cd24           | 0.560  | -0.369 | -1.421 | 0.444  |
| 2.44E-03             |                |        |        |        |        |
| ENSRNOG000000015904  | Wfdc1          | 0.051  | -0.394 | -1.309 | 0.358  |
| 2.45E-03             |                |        |        |        |        |
| ENSRNOG00000000657   | Nek7           | 0.119  | -0.232 | -0.743 | 0.270  |
| 2.46E-03             |                |        |        |        |        |
| ENSRNOG000000032443  | Lmod3          | -0.122 | -0.608 | -0.966 | 0.462  |
| 0.677 2.47E-03       |                |        |        |        |        |
| ENSRNOG000000030869  | Aldoart2       | 0.379  | -0.585 | -1.557 | 0.654  |
| 1.307 2.48E-03       |                |        |        |        |        |
| ENSRNOG000000008086  | Dpf3           | -0.004 | -0.272 | -1.155 | 0.265  |
| 0.852 2.49E-03       |                |        |        |        |        |
| ENSRNOG000000007059  | Atplb4         | -0.199 | 0.579  | 1.009  | -0.732 |
| 1.271 2.50E-03       |                |        |        |        |        |
| ENSRNOG000000006305  | Slc38a2        | -0.058 | -0.175 | -0.658 |        |
| 0.218 0.731 2.59E-03 |                |        |        |        |        |
| ENSRNOG000000010475  | Casp3          | 0.088  | 0.392  | 0.918  | -0.130 |
| 2.62E-03             |                |        |        |        |        |
| ENSRNOG000000016451  | Cd1d1          | 0.038  | -0.401 | -1.285 | 0.463  |
| 2.62E-03             |                |        |        |        |        |
| ENSRNOG000000009819  | Vezf1          | 0.168  | -0.240 | -0.837 | 0.190  |
| 2.63E-03             |                |        |        |        |        |
| ENSRNOG000000019585  | Kat8           | 0.109  | -0.222 | -0.604 | 0.247  |
| 2.63E-03             |                |        |        |        |        |
| ENSRNOG000000003887  | Lgi2           | 0.163  | -0.576 | -2.222 | 0.449  |
| 2.66E-03             |                |        |        |        |        |
| ENSRNOG000000005615  | Gadd45a        | -0.446 | 2.082  | 3.227  | -1.766 |
| 1.860 2.66E-03       |                |        |        |        |        |
| ENSRNOG000000047236  | AABR07008066.2 | -0.019 | -0.440 | -1.334 |        |
| 0.271 1.177 2.66E-03 |                |        |        |        |        |
| ENSRNOG000000009439  | Eef1a1         | 0.024  | 0.424  | 1.372  | -0.435 |
| 2.67E-03             |                |        |        |        |        |
| ENSRNOG000000014034  | Olfml2a        | 0.002  | 0.043  | 0.685  | -0.484 |
| 2.67E-03             |                |        |        |        |        |
| ENSRNOG000000008145  | Traf3          | 0.075  | 0.163  | 0.346  | -0.405 |
| 2.69E-03             |                |        |        |        |        |
| ENSRNOG000000030245  | Tango2         | 0.014  | -0.149 | -0.636 | 0.278  |
| 0.632 2.71E-03       |                |        |        |        |        |
| ENSRNOG000000056462  | Tmf1           | 0.046  | -0.261 | -0.546 | 0.165  |
| 2.74E-03             |                |        |        |        |        |
| ENSRNOG000000024795  | Zfp862         | -0.184 | 0.660  | 1.364  | -0.689 |
| 1.036 2.74E-03       |                |        |        |        |        |
| ENSRNOG000000011588  | Rnf146         | 0.025  | -0.193 | -0.379 | 0.123  |
| 0.374 2.75E-03       |                |        |        |        |        |
| ENSRNOG000000010134  | Acot2          | -0.418 | -0.114 | -0.258 | 0.006  |
| 0.711 2.76E-03       |                |        |        |        |        |
| ENSRNOG000000021139  | Esrra          | -0.234 | -0.342 | -0.793 | 0.355  |
| 0.670 2.76E-03       |                |        |        |        |        |

|                      |                |        |        |        |               |
|----------------------|----------------|--------|--------|--------|---------------|
| ENSRNOG00000014044   | Pank4          | -0.063 | -0.225 | -0.739 | 0.275         |
| 0.537 2.76E-03       |                |        |        |        |               |
| ENSRNOG00000017871   | Sidt2          | 0.042  | -0.137 | -0.299 | 0.205 0.385   |
| 2.76E-03             |                |        |        |        |               |
| ENSRNOG00000007089   | Lgmn           | -0.055 | 0.323  | 0.906  | -0.248 -0.580 |
| 2.76E-03             |                |        |        |        |               |
| ENSRNOG00000013751   | Prosc          | 0.071  | -0.182 | -0.423 | 0.157 0.335   |
| 2.79E-03             |                |        |        |        |               |
| ENSRNOG00000012835   | Espl1          | -0.425 | -0.707 | -2.016 | 0.678         |
| 1.346 2.81E-03       |                |        |        |        |               |
| ENSRNOG00000006931   | Eepd1          | 0.227  | -0.472 | -1.620 | 0.533 1.121   |
| 2.81E-03             |                |        |        |        |               |
| ENSRNOG00000014030   | Sym            | 0.058  | -0.288 | -0.986 | 0.254 0.721   |
| 2.81E-03             |                |        |        |        |               |
| ENSRNOG000000061468  | AABR07042825.1 | -0.033 | 1.864  | 3.222  | -1.703        |
| -2.876 2.81E-03      |                |        |        |        |               |
| ENSRNOG000000021090  | Pygm           | 0.244  | -0.264 | -1.428 | 0.317 1.042   |
| 2.81E-03             |                |        |        |        |               |
| ENSRNOG000000031590  | AABR07048308.1 | 0.274  | -0.276 | -1.208 |               |
| 0.375 1.008 2.81E-03 |                |        |        |        |               |
| ENSRNOG000000043037  | Zfp770         | -0.025 | -0.451 | -0.757 |               |
| 0.293 0.826 2.81E-03 |                |        |        |        |               |
| ENSRNOG00000011422   | Atmin          | 0.016  | -0.220 | -0.817 | 0.145 0.613   |
| 2.81E-03             |                |        |        |        |               |
| ENSRNOG00000013293   | Mccc1          | -0.104 | -0.221 | -0.557 | 0.192         |
| 0.529 2.81E-03       |                |        |        |        |               |
| ENSRNOG000000025459  | Mars           | -0.076 | -0.070 | -0.260 | 0.147         |
| 0.314 2.81E-03       |                |        |        |        |               |
| ENSRNOG000000060821  | Rnf114         | 0.033  | -0.091 | -0.306 | 0.108         |
| 0.276 2.81E-03       |                |        |        |        |               |
| ENSRNOG00000018020   | Apbb1          | 0.073  | 0.399  | 0.588  | -0.156 -0.540 |
| 2.81E-03             |                |        |        |        |               |
| ENSRNOG00000017911   | Tcaf1          | -0.071 | 0.176  | 0.761  | -0.236 -0.792 |
| 2.81E-03             |                |        |        |        |               |
| ENSRNOG000000043300  | LOC100912292   | -0.475 | 1.078  | 2.092  | -0.532        |
| -1.336 2.81E-03      |                |        |        |        |               |
| ENSRNOG000000042847  | LOC687707      | 0.478  | 0.918  | 1.558  | -1.633 -1.796 |
| 2.81E-03             |                |        |        |        |               |
| ENSRNOG000000002828  | Tob1           | 0.008  | -0.346 | -0.798 | 0.392 0.657   |
| 2.82E-03             |                |        |        |        |               |
| ENSRNOG000000050843  | Mut            | -0.063 | -0.342 | -0.713 | 0.240         |
| 0.634 2.82E-03       |                |        |        |        |               |
| ENSRNOG000000023452  | LOC691354      | -0.009 | -0.509 | -1.249 |               |
| 0.453 0.799 2.82E-03 |                |        |        |        |               |
| ENSRNOG000000024972  | Cox10          | -0.226 | -0.318 | -0.867 | 0.223         |
| 0.763 2.85E-03       |                |        |        |        |               |
| ENSRNOG000000020544  | Sdr39u1        | -0.151 | -0.239 | -0.619 |               |
| 0.395 0.619 2.85E-03 |                |        |        |        |               |
| ENSRNOG000000048050  | Tmem120b       | -0.003 | -0.062 | -0.565 |               |
| 0.160 0.489 2.85E-03 |                |        |        |        |               |
| ENSRNOG00000019648   | Col6a3         | 0.054  | 0.153  | 0.918  | -0.540 -1.035 |
| 2.85E-03             |                |        |        |        |               |
| ENSRNOG00000001654   | Cpox           | -0.076 | -0.189 | -0.462 | 0.102         |
| 0.381 2.86E-03       |                |        |        |        |               |

|                                            |         |        |        |        |        |             |
|--------------------------------------------|---------|--------|--------|--------|--------|-------------|
| ENSRNOG00000025000<br>0.347 2.86E-03       | Cep104  | 0.005  | -0.122 |        | -0.425 | 0.075       |
| ENSRNOG00000011821<br>2.86E-03             | S100a4  | 0.270  | 0.814  | 2.314  | -1.008 | -1.470      |
| ENSRNOG00000005214<br>2.91E-03             | Plek    | 1.569  | 0.288  | 0.493  | -0.944 | -1.234      |
| ENSRNOG00000021011<br>2.93E-03             | Fut2    | 0.420  | 0.907  | 1.487  | -1.554 | -1.519      |
| ENSRNOG00000017369<br>2.93E-03             | Mustn1  | 0.628  | 1.324  | 2.327  | -1.168 | -1.854      |
| ENSRNOG00000002449<br>0.536 2.96E-03       | Maged2  | -0.126 |        | 0.186  | 0.526  | -0.141      |
| ENSRNOG00000010150<br>3.02E-03             | Strbp   | 0.131  | -0.301 |        | -0.994 | 0.281 0.712 |
| ENSRNOG00000010934<br>3.02E-03             | Spa17   | 0.233  | -0.590 |        | -1.279 | 0.533 0.907 |
| ENSRNOG00000001770<br>0.758 3.02E-03       | Ehhadh  | 0.122  | -0.331 |        | -0.665 | 0.351       |
| ENSRNOG00000017250<br>3.02E-03             | Gmpr    | 0.203  | -0.268 |        | -0.927 | 0.275 0.614 |
| ENSRNOG00000006096<br>3.062 3.02E-03       | Slc26a7 | -0.172 |        | 1.236  | 2.671  | -1.295      |
| ENSRNOG00000020182<br>3.02E-03             | Mvp     | 0.105  | 0.716  | 0.887  | -0.616 | -0.793      |
| ENSRNOG00000001249<br>3.05E-03             | Col6a1  | 0.136  | 0.145  | 0.762  | -0.413 | -0.912      |
| ENSRNOG00000014935<br>0.389 3.06E-03       | Peo1    | -0.027 |        | -0.198 | -0.420 | 0.169       |
| ENSRNOG00000013076<br>0.387 3.06E-03       | Csnkle  | 0.034  | -0.091 |        | -0.424 | 0.176       |
| ENSRNOG00000039496<br>3.06E-03             | Plp2    | 0.168  | 0.423  | 0.800  | -0.404 | -0.620      |
| ENSRNOG00000024605<br>0.291 0.727 3.07E-03 | Fam220a | -0.040 |        | -0.374 |        | -0.937      |
| ENSRNOG00000018047<br>0.411 3.07E-03       | Gorasp1 | 0.016  | -0.072 |        | -0.504 | 0.132       |
| ENSRNOG00000015380<br>3.07E-03             | Jup     | 0.058  | 0.315  | 0.348  | -0.242 | -0.404      |
| ENSRNOG00000010664<br>3.08E-03             | Wdr73   | 0.147  | 0.251  | 0.498  | -0.320 | -0.637      |
| ENSRNOG00000019180<br>3.12E-03             | Acsl4   | 0.111  | 0.892  | 1.432  | -0.846 | -1.121      |
| ENSRNOG00000025460<br>3.12E-03             | Tmem71  | 0.226  | 0.970  | 1.758  | -0.638 | -1.404      |
| ENSRNOG00000060120<br>0.457 3.12E-03       | Selo    | -0.076 |        | -0.135 | -0.518 | 0.234       |
| ENSRNOG00000014289<br>3.12E-03             | Arpc2   | 0.098  | 0.107  | 0.360  | -0.182 | -0.371      |
| ENSRNOG00000010553<br>3.12E-03             | Pnma1   | 0.705  | 1.635  | 2.377  | -1.780 | -1.919      |
| ENSRNOG00000000922<br>3.13E-03             | Sumf2   | 0.253  | -0.341 |        | -1.471 | 0.368 0.991 |
| ENSRNOG00000018825<br>0.318 3.13E-03       | Dcaf11  | 0.046  | -0.144 |        | -0.407 | 0.212       |

|                                            |                          |        |        |        |          |
|--------------------------------------------|--------------------------|--------|--------|--------|----------|
| ENSRNOG00000000809<br>3.13E-03             | Atat1 -0.093             | 0.373  | 0.610  | -0.297 | -0.561   |
| ENSRNOG00000018681<br>1.167 3.13E-03       | LOC100910255             | 0.005  | 0.300  | 1.432  | -0.607 - |
| ENSRNOG00000006328<br>3.13E-03             | Wwp1 0.138 -0.398        | -0.982 | 0.311  | 0.695  |          |
| ENSRNOG00000018657<br>0.454 3.17E-03       | Scrn3 -0.170             | -0.365 | -0.647 | 0.148  |          |
| ENSRNOG00000018097<br>0.415 3.19E-03       | Emc1 -0.052              | -0.101 | -0.474 | 0.093  |          |
| ENSRNOG00000018533<br>3.19E-03             | Iffo1 -0.074             | 0.450  | 0.939  | -0.319 | -0.609   |
| ENSRNOG00000001750<br>3.19E-03             | Chrd -0.257              | 0.864  | 1.587  | -1.075 | -1.272   |
| ENSRNOG00000020644<br>3.19E-03             | Nsg2 0.188 0.555 2.135   | -1.273 | -2.278 |        |          |
| ENSRNOG00000013194<br>0.801 3.20E-03       | Rps6ka2 0.060 -0.369     | -1.209 | 0.252  |        |          |
| ENSRNOG00000012663<br>3.20E-03             | Mfsd6 0.052 -0.183       | -0.945 | 0.167  | 0.602  |          |
| ENSRNOG00000006985<br>3.20E-03             | Ccnk 0.068 -0.142        | -0.472 | 0.190  | 0.440  |          |
| ENSRNOG00000028113<br>0.428 3.20E-03       | Whamm -0.069             | -0.005 | -0.248 | 0.143  |          |
| ENSRNOG00000006731<br>3.20E-03             | Spc25 0.514 0.373 1.686  | -0.641 | -2.529 |        |          |
| ENSRNOG00000011154<br>0.328 0.762 3.22E-03 | Adgrf5 -0.154            | -0.294 | -0.549 |        |          |
| ENSRNOG00000005371<br>3.23E-03             | Klhl29 0.043 0.597 0.961 | -0.270 | -0.787 |        |          |
| ENSRNOG00000016242<br>3.23E-03             | Fzd1 -0.102              | 0.189  | 0.727  | -0.280 | -0.803   |
| ENSRNOG00000012443<br>0.757 3.26E-03       | Cpt2 -0.485              | -0.331 | -0.577 | 0.185  |          |
| ENSRNOG00000007862<br>0.602 3.28E-03       | Acat1 -0.380             | -0.260 | -0.631 | 0.234  |          |
| ENSRNOG00000008118<br>3.29E-03             | Sync 0.192 0.320 0.370   | -0.264 | -0.570 |        |          |
| ENSRNOG00000040257<br>0.414 3.30E-03       | Chmp2b -0.055            | 0.093  | 0.389  | -0.255 | -        |
| ENSRNOG00000013468<br>0.997 3.32E-03       | Fam213b 0.285 -0.388     | -1.463 | 0.518  |        |          |
| ENSRNOG00000006947<br>0.530 3.35E-03       | Pdhx -0.187              | -0.314 | -0.778 | 0.158  |          |
| ENSRNOG00000017352<br>0.414 3.35E-03       | Ctdnep1 0.000 -0.240     | -0.528 | 0.252  |        |          |
| ENSRNOG00000003063<br>3.36E-03             | Phka1 0.141 -0.281       | -1.616 | 0.184  | 1.044  |          |
| ENSRNOG00000004229<br>3.37E-03             | Tac3 0.215 1.460 2.928   | -1.841 | -3.515 |        |          |
| ENSRNOG00000017116<br>0.495 3.38E-03       | Zfp532 0.068 -0.169      | -0.662 | 0.195  |        |          |
| ENSRNOG00000013618<br>0.563 3.38E-03       | Ankrd10 -0.159           | 0.242  | 0.609  | -0.453 | -        |

|                                            |            |        |        |        |        |        |          |
|--------------------------------------------|------------|--------|--------|--------|--------|--------|----------|
| ENSRNOG00000042477<br>3.42E-03             | Clrn1      | 1.216  | 0.459  | 3.202  | -0.171 | -3.104 |          |
| ENSRNOG00000048704<br>0.945 3.46E-03       | RGD1562758 | 0.262  | -0.309 |        | -1.014 | 0.357  |          |
| ENSRNOG00000052498<br>0.616 3.46E-03       | Grb14      | -0.060 |        | -0.041 | -0.614 | 0.124  |          |
| ENSRNOG00000015385<br>3.46E-03             | Pink1      | 0.007  | -0.227 |        | -0.668 | 0.291  | 0.577    |
| ENSRNOG00000003191<br>0.856 3.46E-03       | Bhlhb9     |        | -0.153 |        | 0.181  | 0.843  | -0.624 - |
| ENSRNOG00000006646<br>3.47E-03             | Vopp1      | -0.167 |        | 0.090  | 1.296  | -0.216 | -0.994   |
| ENSRNOG00000008942<br>0.536 1.547 3.47E-03 | RGD1304963 | -0.898 |        |        | -0.360 | -1.385 |          |
| ENSRNOG00000007949<br>1.216 3.47E-03       | Rgn        | -0.407 |        | -0.781 | -1.830 | 0.660  |          |
| ENSRNOG00000024568<br>0.369 0.768 3.47E-03 | Ndufs7     |        | -0.103 |        | -0.330 | -0.950 |          |
| ENSRNOG00000052025<br>3.47E-03             | Aes        | 0.111  | -0.278 |        | -0.798 | 0.359  | 0.591    |
| ENSRNOG00000015869<br>0.588 3.47E-03       | Pccb       | -0.134 |        | -0.263 | -0.728 | 0.258  |          |
| ENSRNOG00000009217<br>3.47E-03             | Fbxo6      | 0.122  | -0.250 |        | -0.610 | 0.349  | 0.544    |
| ENSRNOG00000020892<br>3.47E-03             | Dpf2       | 0.014  | -0.109 |        | -0.430 | 0.155  | 0.361    |
| ENSRNOG00000017954<br>3.47E-03             | Slmo1      | 0.266  | 0.299  | 0.947  | -0.577 | -1.247 |          |
| ENSRNOG00000006236<br>3.47E-03             | Dsn1       | 0.487  | 0.650  | 1.306  | -0.664 | -1.556 |          |
| ENSRNOG00000025581<br>3.47E-03             | Vwa2       | 0.745  | 1.899  | 3.201  | -2.391 | -2.895 |          |
| ENSRNOG00000028844<br>1.128 3.47E-03       | Slc9a5     |        | 0.371  | -0.425 | -1.316 | 0.536  |          |
| ENSRNOG00000012860<br>3.47E-03             | Tmem184c   |        | 0.038  | 0.015  | 0.246  | -0.359 | -0.605   |
| ENSRNOG00000004768<br>3.47E-03             | Myf5       | -0.242 |        | 0.429  | 1.643  | -0.720 | -1.379   |
| ENSRNOG00000014791<br>3.48E-03             | Peg3       | 0.061  | -0.083 |        | 0.485  | -0.377 | -0.644   |
| ENSRNOG00000019276<br>0.102 0.413 3.48E-03 | RGD735029  | -0.077 |        |        | -0.124 | -0.476 |          |
| ENSRNOG00000003809<br>3.49E-03             | Sat1       | -0.137 |        | 0.957  | 1.515  | -0.760 | -1.149   |
| ENSRNOG00000050277<br>3.50E-03             | Uckl1      | 0.091  | -0.167 |        | -0.640 | 0.297  | 0.576    |
| ENSRNOG00000002278<br>3.51E-03             | Tec        | 0.108  | 0.561  | 1.621  | -0.591 | -1.049 |          |
| ENSRNOG00000022417<br>0.179 0.460 3.51E-03 | Prickle3   |        | -0.206 |        | -0.115 | -0.416 |          |
| ENSRNOG00000060329<br>3.52E-03             | Emb        | 0.053  | 2.355  | 5.104  | -1.897 | -4.051 |          |
| ENSRNOG00000009571<br>3.53E-03             | Wipf3      | 0.405  | -0.800 |        | -1.488 | 0.659  | 0.969    |

|                      |          |                   |             |             |        |
|----------------------|----------|-------------------|-------------|-------------|--------|
| ENSRNOG00000030597   | Ankrd52  | -0.148            | -0.194      | -0.700      |        |
| 0.102 0.592 3.53E-03 |          |                   |             |             |        |
| ENSRNOG00000028063   | Tmem38b  | -0.091            | 0.501 0.912 | -0.513      | -      |
| 0.719 3.57E-03       |          |                   |             |             |        |
| ENSRNOG00000031090   | RT1-CE7  | -0.077            | 0.828 1.353 | -0.423      | -      |
| 0.821 3.60E-03       |          |                   |             |             |        |
| ENSRNOG00000017108   | Syngr1   | -0.012            | -0.351      | -0.759      |        |
| 0.488 0.660 3.61E-03 |          |                   |             |             |        |
| ENSRNOG00000006997   | App      | -0.065            | 0.390 0.879 | -0.432      | -0.659 |
| 3.65E-03             |          |                   |             |             |        |
| ENSRNOG00000008157   | Syn2     | 0.037 -0.107      | -0.476      | 0.255 1.198 |        |
| 3.66E-03             |          |                   |             |             |        |
| ENSRNOG000000059142  | Dtwd2    | -0.016            | -0.268      | -0.736      | 0.247  |
| 0.646 3.66E-03       |          |                   |             |             |        |
| ENSRNOG00000018281   | Uqcrfs1  | -0.217            | -0.361      | -0.736      |        |
| 0.259 0.644 3.67E-03 |          |                   |             |             |        |
| ENSRNOG000000056457  | Gpd1     | 0.259 -0.488      | -1.984      | 0.492 1.373 |        |
| 3.68E-03             |          |                   |             |             |        |
| ENSRNOG00000004195   | Dtl      | 0.438 1.464 2.055 | -1.824      | -2.828      |        |
| 3.71E-03             |          |                   |             |             |        |
| ENSRNOG00000008921   | Dyn112   | -0.248            | -0.236      | -0.838      |        |
| 0.262 0.571 3.76E-03 |          |                   |             |             |        |
| ENSRNOG000000049985  | Gprasp1  | -0.072            | 0.252 0.682 | -0.337      | -      |
| 0.586 3.78E-03       |          |                   |             |             |        |
| ENSRNOG000000024181  | Tpsab1   | -0.396            | -0.326      | -0.278      |        |
| 0.702 1.140 3.80E-03 |          |                   |             |             |        |
| ENSRNOG00000010029   | Uald2    | 0.173 -0.380      | -1.164      | 0.400       |        |
| 0.824 3.80E-03       |          |                   |             |             |        |
| ENSRNOG00000018952   | Sema3g   | -0.020            | -0.023      | -0.439      |        |
| 0.110 0.638 3.82E-03 |          |                   |             |             |        |
| ENSRNOG00000013018   | Eda2r    | -0.100            | 2.077 2.944 | -1.768      | -1.820 |
| 3.82E-03             |          |                   |             |             |        |
| ENSRNOG00000011891   | Atp6v1b2 | -0.112            | -0.114      | -0.270      |        |
| 0.116 0.324 3.87E-03 |          |                   |             |             |        |
| ENSRNOG000000032297  | Msmo1    | -0.109            | 0.187 0.539 | -0.269      | -0.511 |
| 3.87E-03             |          |                   |             |             |        |
| ENSRNOG00000001242   | Gstt3    | 0.179 1.089 1.891 | -0.857      | -1.192      |        |
| 3.87E-03             |          |                   |             |             |        |
| ENSRNOG00000009446   | Rxra     | 0.210 -0.177      | -0.781      | 0.288 0.615 |        |
| 3.88E-03             |          |                   |             |             |        |
| ENSRNOG00000000244   | Coil     | 0.212 -0.265      | -0.636      | 0.378 0.458 |        |
| 3.88E-03             |          |                   |             |             |        |
| ENSRNOG00000019634   | Eif4e2   | -0.010            | 0.097 0.219 | -0.226      | -      |
| 0.382 3.88E-03       |          |                   |             |             |        |
| ENSRNOG00000012210   | Sptlc2   | -0.089            | 0.275 0.828 | -0.383      | -      |
| 0.653 3.88E-03       |          |                   |             |             |        |
| ENSRNOG00000012031   | St8sia2  | 0.219 2.054 2.732 | -2.439      | -3.078      |        |
| 3.88E-03             |          |                   |             |             |        |
| ENSRNOG00000019518   | Pde4c    | -0.046            | -0.474      | -0.920      | 0.478  |
| 0.808 3.89E-03       |          |                   |             |             |        |
| ENSRNOG00000017077   | Snx7     | 0.015 0.111 0.733 | -0.303      | -0.656      |        |
| 3.96E-03             |          |                   |             |             |        |
| ENSRNOG000000060750  | Rnf111   | -0.156            | -0.113      | -0.294      |        |
| 0.154 0.445 3.97E-03 |          |                   |             |             |        |

|                                            |              |        |        |        |        |
|--------------------------------------------|--------------|--------|--------|--------|--------|
| ENSRNOG00000020642<br>0.440 3.97E-03       | Flad1        | -0.046 | -0.165 | -0.509 | 0.198  |
| ENSRNOG00000009414<br>3.97E-03             | Creld1       | 0.028  | 0.442  | 0.545  | -0.337 |
| ENSRNOG00000052802<br>3.98E-03             | Aldoa        | 0.385  | -0.344 | -1.436 | 0.378  |
| ENSRNOG00000019982<br>3.99E-03             | Ethel        | 0.087  | -0.184 | -0.656 | 0.205  |
| ENSRNOG00000023150<br>4.00E-03             | Gpi          | 0.218  | -0.297 | -1.393 | 0.289  |
| ENSRNOG00000008058<br>4.00E-03             | Tmprss5      | 0.515  | 0.617  | 0.974  | -0.566 |
| ENSRNOG00000008600<br>4.01E-03             | Sytl1        | -0.139 | 1.409  | 3.448  | -1.116 |
| ENSRNOG00000007600<br>4.03E-03             | Igsf1        | -0.060 | 0.822  | 1.536  | -0.906 |
| ENSRNOG00000037720<br>4.07E-03             | Rita1        | 0.109  | -0.268 | -0.885 | 0.385  |
| ENSRNOG00000033921<br>0.122 0.616 4.07E-03 | Als2cl       | -0.206 | -0.117 | -0.515 |        |
| ENSRNOG00000050625<br>0.752 1.651 4.08E-03 | LOC100911217 | 0.409  | -0.377 | -1.331 |        |
| ENSRNOG00000030880<br>4.09E-03             | Hs6st2       | 0.303  | 0.715  | 1.150  | -0.802 |
| ENSRNOG00000048719<br>0.587 4.14E-03       | Dtnbp1       | 0.097  | -0.299 | -0.758 | 0.434  |
| ENSRNOG00000054561<br>4.16E-03             | Isg20        | 0.014  | 0.958  | 1.486  | -0.964 |
| ENSRNOG00000010748<br>4.20E-03             | Mtus1        | 0.011  | -0.218 | -0.693 | 0.128  |
| ENSRNOG00000028137<br>4.21E-03             | Mki67        | 0.064  | 0.921  | 1.797  | -1.261 |
| ENSRNOG00000059215<br>0.538 4.25E-03       | Pqlc1        | -0.207 | -0.027 | -0.288 | 0.224  |
| ENSRNOG00000011781<br>0.545 4.25E-03       | Oplah        | -0.143 | -0.288 | -0.755 | 0.271  |
| ENSRNOG00000022331<br>0.979 2.060 4.27E-03 | Ccdc78       | -0.080 | -0.741 | -1.863 |        |
| ENSRNOG00000028822<br>4.28E-03             | Ngfrap1      | 0.568  | 0.165  | 0.586  | -0.168 |
| ENSRNOG00000006689<br>4.28E-03             | Chd7         | 0.077  | -0.209 | -0.855 | 0.102  |
| ENSRNOG00000005963<br>4.28E-03             | Rab2a        | 0.188  | -0.148 | -0.523 | 0.235  |
| ENSRNOG00000056637<br>0.460 4.28E-03       | Abhd16a      | 0.129  | -0.234 | -0.537 | 0.309  |
| ENSRNOG00000014230<br>4.32E-03             | Map1a        | -0.020 | 0.762  | 1.537  | -1.376 |
| ENSRNOG00000016190<br>0.720 4.33E-03       | Coq9         | -0.223 | -0.310 | -0.875 | 0.311  |
| ENSRNOG00000007801<br>0.471 4.33E-03       | R3hdm2       | 0.191  | -0.190 | -0.558 | 0.296  |
| ENSRNOG00000001448<br>4.33E-03             | Hip1         | 0.138  | 0.151  | 0.323  | -0.289 |

|                     |               |        |        |        |        |        |
|---------------------|---------------|--------|--------|--------|--------|--------|
| ENSRNOG00000033256  | LOC691141     | -0.064 | 0.470  | 1.019  | -0.252 | -      |
| 1.089               |               |        |        |        |        |        |
| 4.33E-03            |               |        |        |        |        |        |
| ENSRNOG00000020923  | Tuft1         | -0.026 | 0.841  | 1.737  | -0.861 | -1.214 |
| 4.33E-03            |               |        |        |        |        |        |
| ENSRNOG00000003533  | Clcn4         | -0.171 | -0.246 | -1.282 | 0.120  |        |
| 0.888               |               |        |        |        |        |        |
| 4.34E-03            |               |        |        |        |        |        |
| ENSRNOG00000008052  | Atp13a2       | 0.108  | -0.237 | -0.708 | 0.269  |        |
| 0.536               |               |        |        |        |        |        |
| 4.35E-03            |               |        |        |        |        |        |
| ENSRNOG00000013331  | Sdha          | -0.266 | -0.336 | -0.795 | 0.275  |        |
| 0.680               |               |        |        |        |        |        |
| 4.36E-03            |               |        |        |        |        |        |
| ENSRNOG00000002045  | Anxa3         | -0.188 | -0.390 | -0.447 | 0.449  |        |
| 0.553               |               |        |        |        |        |        |
| 4.37E-03            |               |        |        |        |        |        |
| ENSRNOG00000020753  | Bnip1         | 0.124  | -0.360 | -0.726 | 0.419  | 0.523  |
| 4.37E-03            |               |        |        |        |        |        |
| ENSRNOG00000018068  | Rn60_2_0457.1 | -0.122 | -0.266 | -0.642 |        |        |
| 0.334               |               |        |        |        |        |        |
| 0.624               |               |        |        |        |        |        |
| 4.37E-03            |               |        |        |        |        |        |
| ENSRNOG00000054497  | Taf4a         | -0.138 | -0.053 | -0.329 | 0.118  |        |
| 0.445               |               |        |        |        |        |        |
| 4.37E-03            |               |        |        |        |        |        |
| ENSRNOG00000005724  | Map3k7        | -0.038 | 0.480  | 1.072  | -0.556 | -      |
| 0.931               |               |        |        |        |        |        |
| 4.42E-03            |               |        |        |        |        |        |
| ENSRNOG00000015131  | Ube2c         | 0.202  | 0.318  | 1.463  | -0.648 | -1.801 |
| 4.42E-03            |               |        |        |        |        |        |
| ENSRNOG00000003357  | Col3a1        | 0.556  | 0.195  | 0.879  | -0.728 | -1.312 |
| 4.43E-03            |               |        |        |        |        |        |
| ENSRNOG00000003918  | LOC100910173  | -0.118 | -0.286 | -0.445 |        |        |
| 0.351               |               |        |        |        |        |        |
| 0.427               |               |        |        |        |        |        |
| 4.45E-03            |               |        |        |        |        |        |
| ENSRNOG00000006901  | Cd320         | -0.011 | -0.244 | -0.403 | 0.225  |        |
| 0.456               |               |        |        |        |        |        |
| 4.46E-03            |               |        |        |        |        |        |
| ENSRNOG000000030355 | Mroh1         | -0.157 | -0.079 | -0.346 | 0.140  |        |
| 0.435               |               |        |        |        |        |        |
| 4.46E-03            |               |        |        |        |        |        |
| ENSRNOG00000015999  | Cirbp         | 0.000  | 0.418  | 0.677  | -0.400 | -0.516 |
| 4.48E-03            |               |        |        |        |        |        |
| ENSRNOG00000000435  | Ppt2          | 0.170  | -0.261 | -0.767 | 0.362  | 0.537  |
| 4.48E-03            |               |        |        |        |        |        |
| ENSRNOG00000018564  | Nup93         | -0.096 | 0.434  | 0.832  | -0.515 | -0.564 |
| 4.48E-03            |               |        |        |        |        |        |
| ENSRNOG000000051838 | Atmin         | -0.139 | -0.299 | -0.860 | 0.279  |        |
| 0.848               |               |        |        |        |        |        |
| 4.48E-03            |               |        |        |        |        |        |
| ENSRNOG00000012942  | Satb1         | 0.059  | -0.174 | -0.860 | 0.240  | 0.593  |
| 4.48E-03            |               |        |        |        |        |        |
| ENSRNOG00000003967  | Vmp1          | 0.087  | 0.367  | 0.668  | -0.330 | -0.581 |
| 4.48E-03            |               |        |        |        |        |        |
| ENSRNOG00000016645  | Sfmbt1        | 0.260  | 0.484  | 0.870  | -0.416 | -0.676 |
| 4.48E-03            |               |        |        |        |        |        |
| ENSRNOG00000021137  | Kctd15        | -0.561 | -0.311 | -0.938 |        |        |
| 0.363               |               |        |        |        |        |        |
| 0.780               |               |        |        |        |        |        |
| 4.49E-03            |               |        |        |        |        |        |
| ENSRNOG00000027742  | Adamts12      | -0.980 | 1.082  | 2.240  | -0.789 | -      |
| 1.874               |               |        |        |        |        |        |
| 4.49E-03            |               |        |        |        |        |        |
| ENSRNOG00000009068  | Phlda3        | -0.227 | 0.749  | 1.709  | -0.926 | -      |
| 1.194               |               |        |        |        |        |        |
| 4.53E-03            |               |        |        |        |        |        |
| ENSRNOG000000057556 | Pdzrn3        | -0.061 | -0.185 | -1.024 |        |        |
| 0.158               |               |        |        |        |        |        |
| 0.646               |               |        |        |        |        |        |
| 4.55E-03            |               |        |        |        |        |        |
| ENSRNOG000000061684 | Ndufa9        | -0.249 | -0.297 | -0.702 |        |        |
| 0.251               |               |        |        |        |        |        |
| 0.623               |               |        |        |        |        |        |
| 4.57E-03            |               |        |        |        |        |        |



|                    |                |        |        |        |        |        |
|--------------------|----------------|--------|--------|--------|--------|--------|
| ENSRNOG00000006420 | Rbm38          | 0.007  | -0.258 | -0.609 | 0.323  | 0.509  |
| 4.58E-03           |                |        |        |        |        |        |
| ENSRNOG00000020417 | Gsk3a          | -0.025 | -0.126 | -0.347 | 0.171  |        |
| 0.329              |                |        |        |        |        |        |
| 4.58E-03           |                |        |        |        |        |        |
| ENSRNOG00000024707 | Tp73           | -0.274 | 2.839  | 6.029  | -2.186 | -4.613 |
| 4.58E-03           |                |        |        |        |        |        |
| ENSRNOG00000031328 | Zfp110         | 0.071  | -0.182 | -0.531 | 0.125  |        |
| 0.464              |                |        |        |        |        |        |
| 4.58E-03           |                |        |        |        |        |        |
| ENSRNOG00000014336 | Mcm5           | 0.028  | 0.334  | 1.224  | -0.712 | -1.521 |
| 4.59E-03           |                |        |        |        |        |        |
| ENSRNOG00000016896 | Rpl3           | 0.100  | 0.499  | 1.292  | -0.380 | -0.759 |
| 4.60E-03           |                |        |        |        |        |        |
| ENSRNOG00000019598 | Vegfa          | -0.451 | -0.624 | -1.065 | 0.536  |        |
| 0.932              |                |        |        |        |        |        |
| 4.62E-03           |                |        |        |        |        |        |
| ENSRNOG00000024212 | Papd5          | -0.009 | -0.157 | -0.497 | 0.192  |        |
| 0.422              |                |        |        |        |        |        |
| 4.62E-03           |                |        |        |        |        |        |
| ENSRNOG00000021492 | Rbbp4          | 0.041  | 0.110  | 0.379  | -0.133 | -0.395 |
| 4.62E-03           |                |        |        |        |        |        |
| ENSRNOG00000058375 | AABR07054461.1 | 0.168  | -0.904 | -1.580 |        |        |
| 1.151              |                |        |        |        |        |        |
| 1.803              |                |        |        |        |        |        |
| 4.63E-03           |                |        |        |        |        |        |
| ENSRNOG00000009928 | Bckdhb         | -0.125 | -0.223 | -0.753 |        |        |
| 0.229              |                |        |        |        |        |        |
| 0.593              |                |        |        |        |        |        |
| 4.63E-03           |                |        |        |        |        |        |
| ENSRNOG00000011533 | Irx3           | 1.321  | 0.524  | 1.640  | -0.046 | -1.578 |
| 4.63E-03           |                |        |        |        |        |        |
| ENSRNOG00000016647 | Pla2g2c        | -0.015 | -0.507 | -1.843 |        |        |
| 0.623              |                |        |        |        |        |        |
| 1.725              |                |        |        |        |        |        |
| 4.65E-03           |                |        |        |        |        |        |
| ENSRNOG00000039860 | AC126960.1     | 0.228  | 0.901  | 2.907  | -1.175 | -3.410 |
| 4.68E-03           |                |        |        |        |        |        |
| ENSRNOG00000003815 | Slc25a11       | -0.104 | -0.211 | -0.620 |        |        |
| 0.266              |                |        |        |        |        |        |
| 0.534              |                |        |        |        |        |        |
| 4.70E-03           |                |        |        |        |        |        |
| ENSRNOG00000006304 | Mdm2           | 0.144  | 0.318  | 0.551  | -0.295 | -0.547 |
| 4.70E-03           |                |        |        |        |        |        |
| ENSRNOG00000020546 | Lipe           | -0.412 | -0.455 | -0.468 | 0.536  |        |
| 0.919              |                |        |        |        |        |        |
| 4.73E-03           |                |        |        |        |        |        |
| ENSRNOG00000018343 | Isca1          | 0.111  | -0.274 | -0.647 | 0.187  | 0.477  |
| 4.74E-03           |                |        |        |        |        |        |
| ENSRNOG00000005504 | Pkp4           | -0.139 | 0.352  | 0.997  | -0.378 | -0.706 |
| 4.81E-03           |                |        |        |        |        |        |
| ENSRNOG00000001211 | RGD1303003     | -0.175 | -0.337 | -0.851 |        |        |
| 0.287              |                |        |        |        |        |        |
| 0.716              |                |        |        |        |        |        |
| 4.81E-03           |                |        |        |        |        |        |
| ENSRNOG00000042480 | Hoxd8          | -2.613 | -0.346 | -0.752 | 0.356  |        |
| 1.031              |                |        |        |        |        |        |
| 4.86E-03           |                |        |        |        |        |        |
| ENSRNOG00000055572 | Idh3g          | -0.241 | -0.294 | -0.748 | 0.252  |        |
| 0.628              |                |        |        |        |        |        |
| 4.86E-03           |                |        |        |        |        |        |
| ENSRNOG00000004137 | Ubt2           | 0.268  | 0.177  | 0.522  | -0.261 | -0.471 |
| 4.86E-03           |                |        |        |        |        |        |
| ENSRNOG00000010737 | Mbnl2          | -0.101 | -0.234 | -0.515 | 0.124  |        |
| 0.453              |                |        |        |        |        |        |
| 4.86E-03           |                |        |        |        |        |        |
| ENSRNOG00000013714 | Snrpd1         | 0.014  | 0.070  | 0.413  | -0.116 | -0.456 |
| 4.99E-03           |                |        |        |        |        |        |
| ENSRNOG00000041744 | AABR07065531.1 | 0.161  | -0.211 | 1.174  | -0.587 |        |
| -2.122             |                |        |        |        |        |        |
| 4.99E-03           |                |        |        |        |        |        |
| ENSRNOG00000006961 | Snrpb          | -0.047 | -0.204 | -0.487 | 0.163  |        |
| 0.364              |                |        |        |        |        |        |
| 5.00E-03           |                |        |        |        |        |        |

|                      |                |                   |              |             |        |
|----------------------|----------------|-------------------|--------------|-------------|--------|
| ENSRNOG00000004555   | Sec1414        | -0.303            | -0.339       | -1.143      |        |
| 0.130 1.572 5.01E-03 |                |                   |              |             |        |
| ENSRNOG00000005711   | Ptprd          | 0.070 0.884 1.114 | -0.657       | -0.853      |        |
| 5.04E-03             |                |                   |              |             |        |
| ENSRNOG00000005618   | Fmc1           | 0.004 -0.237      | -0.771       | 0.275 0.615 |        |
| 5.08E-03             |                |                   |              |             |        |
| ENSRNOG00000005802   | Usp24          | -0.106            | -0.229       | -0.778      | 0.210  |
| 0.608 5.09E-03       |                |                   |              |             |        |
| ENSRNOG000000061316  | AABR07000121.1 | 0.033 -0.154      | -0.520       |             |        |
| 0.409 1.033 5.13E-03 |                |                   |              |             |        |
| ENSRNOG00000011057   | Mfn1           | -0.169            | -0.317       | -0.576      | 0.162  |
| 0.481 5.13E-03       |                |                   |              |             |        |
| ENSRNOG000000061100  | Tmem150a       | 0.074 -0.071      | -0.525       | 0.262       |        |
| 0.474 5.15E-03       |                |                   |              |             |        |
| ENSRNOG00000000955   | Lnx2           | -0.167            | 0.370 0.839  | -0.459      | -0.718 |
| 5.15E-03             |                |                   |              |             |        |
| ENSRNOG000000036794  | Asb16          | 0.110 -0.151      | -0.839       | 0.074 0.537 |        |
| 5.26E-03             |                |                   |              |             |        |
| ENSRNOG000000015080  | Wdfy1          | 0.210 0.305 0.423 | -0.451       | -0.477      |        |
| 5.29E-03             |                |                   |              |             |        |
| ENSRNOG00000010728   | Stradb         | 0.057 -0.390      | -0.787       | 0.179       |        |
| 0.470 5.30E-03       |                |                   |              |             |        |
| ENSRNOG000000023202  | Usp15          | 0.133 -0.341      | -0.781       | 0.166 0.498 |        |
| 5.31E-03             |                |                   |              |             |        |
| ENSRNOG00000019743   | Tmem63b        | -0.066            | -0.047       | -0.387      |        |
| 0.082 0.464 5.33E-03 |                |                   |              |             |        |
| ENSRNOG000000025076  | AI314180       | 0.069 -0.149      | -0.651       | 0.146       |        |
| 0.593 5.38E-03       |                |                   |              |             |        |
| ENSRNOG000000006336  | Fyco1          | -0.067            | -0.105       | -0.565      | 0.049  |
| 0.477 5.39E-03       |                |                   |              |             |        |
| ENSRNOG000000061582  | Scamp1         | 0.018 0.102 0.206 | -0.204       | -0.296      |        |
| 5.41E-03             |                |                   |              |             |        |
| ENSRNOG000000030639  | Usp13          | -0.213            | -0.052       | -0.479      | -0.007 |
| 0.554 5.43E-03       |                |                   |              |             |        |
| ENSRNOG00000016119   | Fzd7           | -0.123            | -0.401       | -1.091      | 0.315  |
| 0.802 5.43E-03       |                |                   |              |             |        |
| ENSRNOG000000033496  | Igdcc4         | -0.118            | 0.387 0.656  | -0.343      | -      |
| 0.631 5.43E-03       |                |                   |              |             |        |
| ENSRNOG000000031766  | Mt-cytb        | -0.396            | -0.323       | -0.704      |        |
| 0.258 0.685 5.47E-03 |                |                   |              |             |        |
| ENSRNOG00000013123   | Scube2         | 0.325 0.031 0.414 | -0.522       | -1.041      |        |
| 5.48E-03             |                |                   |              |             |        |
| ENSRNOG00000011202   | Chrna4         | 0.884 1.502 3.172 | -2.057       | -3.216      |        |
| 5.50E-03             |                |                   |              |             |        |
| ENSRNOG00000005874   | Tle2           | 0.129 -0.032      | -0.744       | 0.254 0.629 |        |
| 5.55E-03             |                |                   |              |             |        |
| ENSRNOG000000045605  | Uxs1           | 0.099 -0.006      | 0.137 -0.135 | -0.316      |        |
| 5.55E-03             |                |                   |              |             |        |
| ENSRNOG00000019090   | Cct3           | -0.075            | 0.086 0.500  | -0.102      | -0.425 |
| 5.58E-03             |                |                   |              |             |        |
| ENSRNOG00000010966   | Itgb1          | -0.061            | 0.010 0.478  | -0.201      | -0.476 |
| 5.58E-03             |                |                   |              |             |        |
| ENSRNOG00000018317   | Aak1           | 0.072 0.573 0.721 | -0.704       | -0.708      |        |
| 5.58E-03             |                |                   |              |             |        |

|                    |                |          |        |        |        |        |
|--------------------|----------------|----------|--------|--------|--------|--------|
| ENSRNOG00000053679 | AABR07060862.1 | -0.213   | 1.041  | 2.108  | -1.669 |        |
| -1.800             | 5.58E-03       |          |        |        |        |        |
| ENSRNOG00000058136 | Vomlr90        | -0.169   | -0.550 | -0.905 |        |        |
| 0.623              | 0.866          | 5.59E-03 |        |        |        |        |
| ENSRNOG00000011794 | Tcea3          | 0.079    | -0.304 | -0.918 | 0.375  | 0.653  |
| 5.59E-03           |                |          |        |        |        |        |
| ENSRNOG00000056550 | Epb4114b       | 0.250    | 0.422  | 1.024  | -0.636 | -1.095 |
| 5.59E-03           |                |          |        |        |        |        |
| ENSRNOG00000009334 | Knstrn         | 0.678    | 1.164  | 2.303  | -1.520 | -2.115 |
| 5.59E-03           |                |          |        |        |        |        |
| ENSRNOG00000027278 | Pramef8        | 0.120    | -0.182 | -0.708 | 0.195  |        |
| 0.563              | 5.60E-03       |          |        |        |        |        |
| ENSRNOG00000018462 | Rabep2         | 0.504    | -0.289 | -1.255 | 0.318  |        |
| 0.913              | 5.60E-03       |          |        |        |        |        |
| ENSRNOG00000018662 | Amacr          | -0.089   | -0.206 | -0.481 | 0.183  |        |
| 0.392              | 5.62E-03       |          |        |        |        |        |
| ENSRNOG00000043076 | AABR07025328.1 | -0.247   | 0.375  | 0.805  | -0.318 |        |
| -0.632             | 5.62E-03       |          |        |        |        |        |
| ENSRNOG00000055450 | Ckmt2          | -0.794   | -0.622 | -1.095 | 0.502  |        |
| 1.196              | 5.65E-03       |          |        |        |        |        |
| ENSRNOG00000017032 | Atp5a1         | -0.159   | -0.308 | -0.732 |        |        |
| 0.273              | 0.607          | 5.65E-03 |        |        |        |        |
| ENSRNOG00000019382 | Zbtb47         | 0.009    | -0.116 | -0.495 | 0.184  |        |
| 0.400              | 5.65E-03       |          |        |        |        |        |
| ENSRNOG00000014852 | Fbxo30         | -0.154   | 0.946  | 1.286  | -0.917 | -      |
| 0.927              | 5.65E-03       |          |        |        |        |        |
| ENSRNOG00000013309 | Pik3ap1        | -0.205   | -0.312 | -1.171 |        |        |
| 0.268              | 0.839          | 5.66E-03 |        |        |        |        |
| ENSRNOG00000021125 | Prdx5          | -0.224   | -0.245 | -0.637 | 0.289  |        |
| 0.559              | 5.70E-03       |          |        |        |        |        |
| ENSRNOG00000007687 | Sema7a         | 0.198    | -0.891 | -2.518 | 0.681  |        |
| 1.433              | 5.72E-03       |          |        |        |        |        |
| ENSRNOG00000018225 | Tp53inp2       | -0.080   | -0.383 | -0.938 |        |        |
| 0.201              | 0.586          | 5.76E-03 |        |        |        |        |
| ENSRNOG00000018082 | Slc26a2        | -0.250   | 0.728  | 1.587  | -0.958 | -      |
| 1.253              | 5.82E-03       |          |        |        |        |        |
| ENSRNOG00000001989 | Alcam          | 0.030    | 0.506  | 1.038  | -0.429 | -0.904 |
| 5.83E-03           |                |          |        |        |        |        |
| ENSRNOG00000025302 | Cdca2          | 0.553    | 0.443  | 1.647  | -0.886 | -2.400 |
| 5.83E-03           |                |          |        |        |        |        |
| ENSRNOG00000047124 | Atp2a1         | 0.528    | -0.313 | -1.373 | 0.316  |        |
| 0.928              | 5.86E-03       |          |        |        |        |        |
| ENSRNOG00000017095 | LOC679881      | -0.233   | -0.312 | -0.805 |        |        |
| 0.152              | 0.592          | 5.86E-03 |        |        |        |        |
| ENSRNOG00000043426 | Ccbl2          | 0.020    | -0.202 | -0.442 | 0.231  | 0.624  |
| 5.88E-03           |                |          |        |        |        |        |
| ENSRNOG00000060350 | Iqsec1         | -0.265   | -0.283 | -0.658 |        |        |
| 0.426              | 0.675          | 5.90E-03 |        |        |        |        |
| ENSRNOG00000013555 | Ankrd55        | 0.527    | 0.531  | 1.534  | -0.856 | -1.613 |
| 5.90E-03           |                |          |        |        |        |        |
| ENSRNOG00000021260 | Prnd           | 0.053    | 1.804  | 3.206  | -2.247 | -3.325 |
| 5.90E-03           |                |          |        |        |        |        |
| ENSRNOG00000016459 | Eif3j          | 0.137    | -0.332 | -0.623 | 0.290  | 0.496  |
| 5.92E-03           |                |          |        |        |        |        |

|                                            |            |        |        |        |        |             |
|--------------------------------------------|------------|--------|--------|--------|--------|-------------|
| ENSRNOG00000001070<br>5.93E-03             | Cdk2ap1    | 0.214  | 0.106  | 0.367  | -0.107 | -0.484      |
| ENSRNOG00000009951<br>5.95E-03             | Aif1l      | 0.061  | 0.473  | 1.228  | -0.229 | -0.959      |
| ENSRNOG00000019522<br>0.544 5.96E-03       | Narfl      | -0.268 |        | -0.132 | -0.613 | 0.155       |
| ENSRNOG00000015866<br>0.480 5.96E-03       | Hint2      | -0.013 |        | -0.168 | -0.578 | 0.269       |
| ENSRNOG00000009555<br>5.97E-03             | Lrriq3     | 0.831  | 1.020  | 0.982  | -1.580 | -1.662      |
| ENSRNOG00000027891<br>0.333 0.917 5.99E-03 | Dhrs11     | -0.581 |        | -0.239 | -0.888 |             |
| ENSRNOG00000020881<br>6.03E-03             | Frmd8      | -0.025 | 0.307  | 0.651  | -0.230 | -0.457      |
| ENSRNOG00000029911<br>6.03E-03             | Cilp       | -0.834 | 1.613  | 2.631  | -1.678 | -1.783      |
| ENSRNOG00000060899<br>0.695 6.05E-03       | Tsc22d3    | 0.026  | -0.478 |        | -1.258 | 0.360       |
| ENSRNOG00000009761<br>6.05E-03             | Tmod1      | 0.353  | 0.312  | 0.371  | -0.260 | -0.605      |
| ENSRNOG00000028649<br>6.05E-03             | Tox3       | 0.343  | 0.597  | 0.755  | -0.686 | -1.438      |
| ENSRNOG00000007700<br>6.06E-03             | Inhbc      | 0.280  | -0.251 |        | -0.777 | 0.527 0.999 |
| ENSRNOG00000003746<br>2.847 6.07E-03       | Gjb1       | -1.171 |        | -1.506 | -1.879 | 1.148       |
| ENSRNOG00000059827<br>1.276 6.07E-03       | LOC691995  | -0.247 |        | 0.748  | 1.957  | -0.434 -    |
| ENSRNOG00000023208<br>0.694 6.10E-03       | RGD1309821 | 0.119  | -0.189 |        | -0.970 | 0.198       |
| ENSRNOG00000007688<br>6.14E-03             | Sms        | 0.047  | 0.130  | 0.459  | -0.214 | -0.624      |
| ENSRNOG00000011014<br>6.16E-03             | Copg2      | 0.022  | 0.183  | 0.400  | -0.246 | -0.418      |
| ENSRNOG00000017671<br>6.21E-03             | Rasa3      | 0.082  | 0.421  | 0.882  | -0.412 | -0.589      |
| ENSRNOG00000021130<br>6.21E-03             | Abcc8      | 0.186  | -0.002 |        | -0.987 | 0.220 0.774 |
| ENSRNOG00000042482<br>0.390 6.21E-03       | Tatdn2     | 0.038  | -0.240 |        | -0.587 | 0.156       |
| ENSRNOG00000001254<br>6.21E-03             | Col6a2     | 0.190  | 0.153  | 0.693  | -0.321 | -0.744      |
| ENSRNOG00000013917<br>1.234 6.22E-03       | Igsf10     | -0.787 |        | 0.344  | 1.695  | -0.126 -    |
| ENSRNOG00000037211<br>6.23E-03             | Kif14      | 0.240  | 0.869  | 2.367  | -1.083 | -2.748      |
| ENSRNOG00000026974<br>3.383 6.23E-03       | Dbnidd1    | -0.579 |        | 1.392  | 3.352  | -2.031 -    |
| ENSRNOG00000000940<br>0.819 6.27E-03       | Flt1       | -0.147 |        | -0.357 | -0.720 | 0.308       |
| ENSRNOG00000021102<br>6.27E-03             | Scn1b      | 0.235  | -0.172 |        | -0.813 | 0.277 0.585 |
| ENSRNOG00000007290<br>0.557 6.29E-03       | Atp1a2     | 0.228  | -0.273 |        | -0.854 | 0.160       |

|                      |         |        |        |        |        |                |
|----------------------|---------|--------|--------|--------|--------|----------------|
| ENSRNOG00000007364   | Rab15   | -0.300 | 0.497  | 2.609  | -1.047 | -2.595         |
| 6.33E-03             |         |        |        |        |        |                |
| ENSRNOG00000000442   | Notch4  | -0.208 | -0.105 | -0.478 |        |                |
| 0.163 0.641 6.37E-03 |         |        |        |        |        |                |
| ENSRNOG00000019363   | Fam212a | 0.338  | 1.039  | 1.526  | -0.469 | -2.041         |
| 6.37E-03             |         |        |        |        |        |                |
| ENSRNOG000000054508  | Foxp2   | 0.023  | -0.184 | -0.387 | 0.238  | 0.735          |
| 6.41E-03             |         |        |        |        |        |                |
| ENSRNOG00000011507   | Pick1   | 0.086  | -0.198 | -0.766 | 0.221  | 0.477          |
| 6.41E-03             |         |        |        |        |        |                |
| ENSRNOG000000037148  | Adap2   | -0.168 | 0.843  | 1.924  | -0.847 | -1.555         |
| 6.43E-03             |         |        |        |        |        |                |
| ENSRNOG000000027326  | Tada2b  | -0.043 | -0.097 | -0.429 |        |                |
| 0.109 0.355 6.43E-03 |         |        |        |        |        |                |
| ENSRNOG000000042932  | Ttc27   | 0.771  | 0.365  | 0.617  | -0.462 | -0.791         |
| 6.43E-03             |         |        |        |        |        |                |
| ENSRNOG000000005333  | Azin1   | 0.090  | 0.201  | 0.457  | -0.282 | -0.552         |
| 6.59E-03             |         |        |        |        |        |                |
| ENSRNOG000000010676  | Smarce1 | 0.024  | 0.162  | 0.326  | -0.194 | -0.310         |
| 6.69E-03             |         |        |        |        |        |                |
| ENSRNOG000000019203  | Eya2    | -0.474 | -0.023 | 0.026  | 0.520  | 0.736          |
| 6.69E-03             |         |        |        |        |        |                |
| ENSRNOG000000032134  | Uqcrc1  | -0.323 | -0.283 | -0.720 |        |                |
| 0.246 0.643 6.69E-03 |         |        |        |        |        |                |
| ENSRNOG000000050742  | Dnmbp   | -0.012 | -0.155 | -0.529 | 0.177  |                |
| 0.562 6.69E-03       |         |        |        |        |        |                |
| ENSRNOG000000001440  | Mdh2    | -0.139 | -0.270 | -0.861 | 0.243  |                |
| 0.660 6.69E-03       |         |        |        |        |        |                |
| ENSRNOG000000016419  | Pdlim5  | -0.006 | -0.199 | -0.458 |        |                |
| 0.146 0.507 6.69E-03 |         |        |        |        |        |                |
| ENSRNOG000000012017  | Otulin  | -0.147 | 1.074  | 1.777  | -0.984 | -              |
| 1.152 6.69E-03       |         |        |        |        |        |                |
| ENSRNOG000000029941  | Grina   | 0.176  | 0.383  | 0.488  | -0.348 | -0.483         |
| 6.76E-03             |         |        |        |        |        |                |
| ENSRNOG000000030328  | Fam98a  | -0.012 | -0.158 | -0.382 |        |                |
| 0.099 0.330 6.77E-03 |         |        |        |        |        |                |
| ENSRNOG000000014007  | Gfod1   | -0.253 | 0.028  | -0.660 | 0.135  | 0.771          |
| 6.79E-03             |         |        |        |        |        |                |
| ENSRNOG000000010258  | Vhl     | 0.038  | 0.093  | 0.445  | -0.251 | -0.409         |
| 6.85E-03             |         |        |        |        |        |                |
| ENSRNOG000000032946  | Pdzd7   | 0.172  | -0.552 | -2.067 | 0.536  | 1.483          |
| 6.86E-03             |         |        |        |        |        |                |
| ENSRNOG000000053735  | Hebp2   | -0.363 | 1.323  | 2.406  | -0.929 | -1.563         |
| 6.87E-03             |         |        |        |        |        |                |
| ENSRNOG000000021144  | Cebpg   | 0.090  | -0.055 | -0.393 | 0.093  | 0.402          |
| 6.88E-03             |         |        |        |        |        |                |
| ENSRNOG000000018515  | Det1    | 0.195  | -0.404 | -1.036 | 0.373  | 0.708          |
| 6.90E-03             |         |        |        |        |        |                |
| ENSRNOG000000016706  | Fanca   | 0.211  | 0.308  | -1.223 | 0.980  | 2.384 6.90E-03 |
|                      |         |        |        |        |        |                |
| ENSRNOG000000049484  | Atp9a   | 0.001  | -0.011 | -0.613 | -0.002 |                |
| 0.424 6.97E-03       |         |        |        |        |        |                |
| ENSRNOG000000014665  | Dhdds   | -0.328 | 0.540  | 0.937  | -0.396 | -0.561         |
| 6.97E-03             |         |        |        |        |        |                |

|                      |              |        |        |        |        |        |
|----------------------|--------------|--------|--------|--------|--------|--------|
| ENSRNOG00000003855   | Dnaja3       | -0.120 | -0.173 | -0.443 |        |        |
| 0.172 0.397 6.97E-03 |              |        |        |        |        |        |
| ENSRNOG000000046984  | St6galnac6   | 0.231  | -0.111 | -0.560 | 0.148  |        |
| 0.445 6.97E-03       |              |        |        |        |        |        |
| ENSRNOG000000005929  | Them6        | 0.116  | -0.388 | -1.005 | 0.643  | 0.737  |
| 7.01E-03             |              |        |        |        |        |        |
| ENSRNOG000000015117  | Lrrc39       | -0.145 | -0.426 | -0.826 |        |        |
| 0.290 0.635 7.01E-03 |              |        |        |        |        |        |
| ENSRNOG000000020865  | Ano1         | -0.678 | 0.401  | 1.129  | -0.373 | -0.841 |
| 7.01E-03             |              |        |        |        |        |        |
| ENSRNOG000000012318  | Aspm         | 0.186  | 0.779  | 1.418  | -0.834 | -1.403 |
| 7.01E-03             |              |        |        |        |        |        |
| ENSRNOG000000004566  | Arhgef15     | -0.172 | -0.271 | -0.541 |        |        |
| 0.401 0.675 7.05E-03 |              |        |        |        |        |        |
| ENSRNOG000000020751  | Rdm1         | 0.126  | -0.075 | -0.265 | 0.199  | 0.422  |
| 7.08E-03             |              |        |        |        |        |        |
| ENSRNOG000000007151  | Cdk14        | -0.062 | 0.108  | 0.936  | -0.308 | -0.737 |
| 7.11E-03             |              |        |        |        |        |        |
| ENSRNOG000000010092  | Magix        | 0.202  | -0.225 | -0.881 | 0.260  | 0.598  |
| 7.17E-03             |              |        |        |        |        |        |
| ENSRNOG0000000055756 | Bcap31       | 0.093  | 0.290  | 0.583  | -0.289 | -0.558 |
| 7.17E-03             |              |        |        |        |        |        |
| ENSRNOG000000011435  | Osbp110      | 0.113  | 0.093  | 0.845  | -0.510 | -1.025 |
| 7.17E-03             |              |        |        |        |        |        |
| ENSRNOG000000018975  | Atg9a        | 0.191  | -0.192 | -0.747 | 0.124  | 0.473  |
| 7.19E-03             |              |        |        |        |        |        |
| ENSRNOG000000015654  | Ghr          | 0.045  | -0.246 | -0.645 | 0.315  | 0.514  |
| 7.20E-03             |              |        |        |        |        |        |
| ENSRNOG000000025806  | Prr3         | 0.046  | 0.232  | 0.386  | -0.366 | -0.403 |
| 7.23E-03             |              |        |        |        |        |        |
| ENSRNOG000000011632  | Cct5         | 0.077  | 0.052  | 0.247  | -0.081 | -0.294 |
| 7.24E-03             |              |        |        |        |        |        |
| ENSRNOG000000007254  | Ttc9         | 0.304  | 0.395  | 0.940  | -0.922 | -0.880 |
| 7.24E-03             |              |        |        |        |        |        |
| ENSRNOG000000010598  | Hs3st1       | -0.017 | -0.247 | -0.623 |        |        |
| 0.583 0.865 7.26E-03 |              |        |        |        |        |        |
| ENSRNOG0000000055761 | Zfp574       | -0.050 | -0.186 | -0.620 |        |        |
| 0.309 0.478 7.26E-03 |              |        |        |        |        |        |
| ENSRNOG000000025338  | Msi2         | 0.008  | -0.178 | -0.486 | 0.054  | 0.336  |
| 7.26E-03             |              |        |        |        |        |        |
| ENSRNOG000000043233  | LOC100912391 | 0.188  | 0.152  | 0.062  | -0.228 | -      |
| 0.409 7.26E-03       |              |        |        |        |        |        |
| ENSRNOG000000026212  | Micall1      | -0.101 | 0.256  | 0.473  | -0.273 | -      |
| 0.433 7.26E-03       |              |        |        |        |        |        |
| ENSRNOG000000011912  | Tmem38a      | 0.314  | -0.183 | -0.782 | 0.191  |        |
| 0.513 7.30E-03       |              |        |        |        |        |        |
| ENSRNOG000000016470  | Ndufa10      | -0.260 | -0.247 | -0.580 |        |        |
| 0.182 0.542 7.35E-03 |              |        |        |        |        |        |
| ENSRNOG000000037850  | mars.02      | 0.071  | -0.209 | -0.393 | 0.285  |        |
| 0.377 7.38E-03       |              |        |        |        |        |        |
| ENSRNOG000000019384  | Med11        | 0.071  | 0.231  | 0.676  | -0.308 | -0.568 |
| 7.45E-03             |              |        |        |        |        |        |
| ENSRNOG000000021031  | Grn          | 0.118  | 0.203  | 0.625  | -0.135 | -0.461 |
| 7.48E-03             |              |        |        |        |        |        |

|                      |            |        |        |        |             |
|----------------------|------------|--------|--------|--------|-------------|
| ENSRNOG00000000812   | RGD1302996 | -0.084 | -0.279 | -0.826 |             |
| 0.304 0.680 7.57E-03 |            |        |        |        |             |
| ENSRNOG00000027183   | Zfyve9     | 0.051  | -0.192 | -0.568 | 0.075       |
| 0.451 7.58E-03       |            |        |        |        |             |
| ENSRNOG00000007040   | Timm17a    | -0.051 | -0.322 | -0.779 |             |
| 0.276 0.531 7.59E-03 |            |        |        |        |             |
| ENSRNOG00000009781   | Dync1i2    | -0.012 | 0.042  | 0.187  | -0.139      |
| 0.254 7.59E-03       |            |        |        |        | -           |
| ENSRNOG00000001762   | Pcyt1a     | 0.165  | -0.095 | -0.415 | 0.112       |
| 0.416 7.66E-03       |            |        |        |        |             |
| ENSRNOG00000015641   | Exoc3l1    | -0.064 | -0.221 | -0.690 |             |
| 0.384 0.742 7.66E-03 |            |        |        |        |             |
| ENSRNOG00000008063   | Hibadh     | -0.161 | -0.130 | -0.232 |             |
| 0.158 0.421 7.66E-03 |            |        |        |        |             |
| ENSRNOG00000010298   | Xbp1       | 0.171  | -0.142 | -0.266 | 0.217 0.312 |
| 7.66E-03             |            |        |        |        |             |
| ENSRNOG00000003736   | Col5a2     | 0.080  | 0.100  | 0.721  | -0.394      |
| 7.66E-03             |            |        |        |        | -0.795      |
| ENSRNOG00000016483   | Myo16      | -0.376 | 0.781  | 1.775  | -1.427      |
| 7.69E-03             |            |        |        |        | -2.268      |
| ENSRNOG00000011944   | Snx10      | -0.016 | 1.080  | 1.906  | -0.975      |
| 7.73E-03             |            |        |        |        | -1.312      |
| ENSRNOG00000005668   | Ndufa8     | -0.135 | -0.325 | -0.741 |             |
| 0.290 0.600 7.81E-03 |            |        |        |        |             |
| ENSRNOG000000060464  | Plxna3     | -0.211 | 0.566  | 0.904  | -0.376      |
| 0.728 7.81E-03       |            |        |        |        | -           |
| ENSRNOG00000016021   | Lims2      | -0.136 | -0.299 | -0.418 | 0.439       |
| 0.681 7.83E-03       |            |        |        |        |             |
| ENSRNOG00000008289   | Slc25a3    | -0.260 | -0.305 | -0.675 |             |
| 0.235 0.600 7.85E-03 |            |        |        |        |             |
| ENSRNOG00000013589   | Cxcl12     | -0.127 | -0.246 | -0.596 |             |
| 0.279 0.724 7.86E-03 |            |        |        |        |             |
| ENSRNOG00000020860   | Tdrkh      | -0.198 | 0.620  | -0.013 | 0.674 1.187 |
| 7.87E-03             |            |        |        |        |             |
| ENSRNOG00000017836   | Rrp36      | 0.268  | -0.281 | -0.580 | 0.298 0.478 |
| 7.91E-03             |            |        |        |        |             |
| ENSRNOG00000006375   | Vdac1      | -0.126 | -0.310 | -0.638 | 0.270       |
| 0.532 7.94E-03       |            |        |        |        |             |
| ENSRNOG00000014076   | Mbnl1      | 0.079  | -0.036 | -0.695 | 0.017 0.584 |
| 7.96E-03             |            |        |        |        |             |
| ENSRNOG000000053428  | Ccpg1      | -0.041 | -0.250 | -0.471 | 0.229       |
| 0.467 7.98E-03       |            |        |        |        |             |
| ENSRNOG00000017564   | Mib2       | -0.100 | -0.063 | -0.337 | 0.213       |
| 0.379 7.98E-03       |            |        |        |        |             |
| ENSRNOG000000056060  | AC094647.2 | -0.524 | 2.005  | 3.615  | -1.150      |
| 3.079 8.02E-03       |            |        |        |        | -           |
| ENSRNOG00000007398   | Zfp691     | 0.114  | -0.372 | -0.761 | 0.344       |
| 0.492 8.05E-03       |            |        |        |        |             |
| ENSRNOG00000021129   | RGD1308428 | -0.224 | -0.132 | -0.353 |             |
| 0.119 0.387 8.05E-03 |            |        |        |        |             |
| ENSRNOG00000026548   | Dhrs7c     | 0.475  | -0.523 | -1.563 | 0.477       |
| 1.010 8.08E-03       |            |        |        |        |             |
| ENSRNOG00000015517   | Zfp444     | -0.179 | -0.205 | -0.457 |             |
| 0.316 0.369 8.08E-03 |            |        |        |        |             |

|                                            |                |        |        |        |              |             |
|--------------------------------------------|----------------|--------|--------|--------|--------------|-------------|
| ENSRNOG00000024085<br>8.08E-03             | Tmem237        | 0.000  | 0.138  | 0.226  | -0.213       | -0.362      |
| ENSRNOG00000039976<br>8.15E-03             | Ptk7           | 0.188  | 0.204  | 0.724  | -0.759       | -1.088      |
| ENSRNOG00000020696<br>0.495 8.17E-03       | Pmvk           | -0.096 |        | -0.215 | -0.465       | 0.392       |
| ENSRNOG00000012710<br>0.314 8.21E-03       | Ubac2          | -0.062 |        | -0.116 | -0.269       | 0.164       |
| ENSRNOG00000006735<br>8.21E-03             | Cdkn2b         | 0.035  | 1.957  | 2.930  | -1.569       | -2.024      |
| ENSRNOG00000018384<br>8.23E-03             | Adam12         | 0.199  | 0.342  | 1.075  | -0.969       | -1.665      |
| ENSRNOG00000020573<br>0.597 8.25E-03       | Efna1          | -0.177 |        | -0.084 | -0.414       | 0.253       |
| ENSRNOG00000007713<br>8.29E-03             | Tmcc3          | 0.207  | -0.322 |        | -0.988       | 0.234 0.598 |
| ENSRNOG00000018119<br>0.465 8.29E-03       | Dhx32          | -0.347 |        | -0.112 | -0.327       | 0.195       |
| ENSRNOG00000021133<br>0.290 8.29E-03       | Lsm14a         | 0.065  | -0.184 |        | -0.352       | 0.171       |
| ENSRNOG00000005258<br>8.29E-03             | Myef2          | 0.097  | -0.028 |        | 0.168 -0.356 | -0.364      |
| ENSRNOG00000058898<br>8.29E-03             | Nedd4          | 0.144  | 0.336  | 0.420  | -0.342       | -0.385      |
| ENSRNOG00000046472<br>8.29E-03             | Arfgap3        | 0.055  | 0.424  | 0.884  | -0.330       | -0.557      |
| ENSRNOG00000034150<br>8.30E-03             | Ft1111         | 0.214  | 0.335  | 1.607  | -0.305       | -1.458      |
| ENSRNOG00000055446<br>8.35E-03             | Amfr           | 0.166  | -0.114 |        | -0.495       | 0.135 0.349 |
| ENSRNOG00000008785<br>8.35E-03             | Klf5           | 0.126  | 0.529  | 1.282  | -0.687       | -1.061      |
| ENSRNOG00000002214<br>8.40E-03             | Klhl8          | 0.329  | 0.519  | 0.786  | -0.421       | -0.803      |
| ENSRNOG00000003720<br>8.41E-03             | Prrx1          | 0.135  | 0.241  | 0.283  | -0.317       | -0.432      |
| ENSRNOG00000033979<br>0.276 0.432 8.42E-03 | AABR07047140.1 | 0.221  | -0.202 |        |              | -0.458      |
| ENSRNOG00000033402<br>8.43E-03             | LOC501110      | 0.167  | 0.100  | 0.358  | -0.280       | -0.529      |
| ENSRNOG00000033736<br>1.057 8.43E-03       | Diras3         | 0.903  | -0.357 |        | 0.740 -0.244 | -           |
| ENSRNOG00000046211<br>8.44E-03             | Fbxw4          | 0.075  | -0.224 |        | -0.399       | 0.353 0.358 |
| ENSRNOG00000046502<br>0.344 8.48E-03       | Lonp1          | -0.161 |        | -0.101 | -0.348       | 0.126       |
| ENSRNOG00000019474<br>1.096 8.54E-03       | Rsph9          | -0.291 |        | -0.242 | -0.864       | 0.401       |
| ENSRNOG00000013503<br>8.54E-03             | Cdh24          | 0.411  | 1.085  | 1.355  | -0.919       | -1.558      |
| ENSRNOG00000039551<br>8.55E-03             | Rdh14          | 0.164  | -0.326 |        | -0.723       | 0.250 0.435 |
| ENSRNOG00000004604<br>8.55E-03             | Slc38a10       | 0.132  | 0.216  | 0.412  | -0.269       | -0.376      |



|                      |                |        |        |       |        |                |
|----------------------|----------------|--------|--------|-------|--------|----------------|
| ENSRNOG00000050729   | AABR07054265.1 | 0.282  | 0.084  | 0.221 | -0.455 | -              |
| 0.813 8.57E-03       |                |        |        |       |        |                |
| ENSRNOG00000009484   | Ptcd3          | -0.090 |        |       | -0.227 | -0.424 0.123   |
| 0.416 8.57E-03       |                |        |        |       |        |                |
| ENSRNOG00000009994   | Dlat           | -0.223 |        |       | -0.357 | -0.839 0.156   |
| 0.585 8.58E-03       |                |        |        |       |        |                |
| ENSRNOG00000019057   | Prkcq          | 0.268  | -0.145 |       | -0.813 | 0.259 0.564    |
| 8.58E-03             |                |        |        |       |        |                |
| ENSRNOG00000055391   | Eif4ebp2       | 0.106  | -0.077 |       | -0.455 | 0.177          |
| 0.495 8.61E-03       |                |        |        |       |        |                |
| ENSRNOG00000019962   | Sars2          | -0.126 |        |       | -0.116 | -0.711 0.205   |
| 0.500 8.65E-03       |                |        |        |       |        |                |
| ENSRNOG00000059166   | Ldb3           | -0.117 |        |       | -0.105 | -0.670 0.099   |
| 0.533 8.69E-03       |                |        |        |       |        |                |
| ENSRNOG00000012831   | Slc25a26       | -0.030 |        |       | -0.294 | -0.715         |
| 0.176 0.478 8.72E-03 |                |        |        |       |        |                |
| ENSRNOG00000049437   | Gpc1           | 0.401  | 0.119  | 0.164 | -0.223 | -0.418         |
| 8.82E-03             |                |        |        |       |        |                |
| ENSRNOG00000018102   | Coa5           | -0.114 |        |       | -0.195 | -0.579 0.033   |
| 0.505 8.83E-03       |                |        |        |       |        |                |
| ENSRNOG00000007427   | Entpd6         | 0.108  | -0.191 |       | -0.853 | 0.260          |
| 0.606 8.85E-03       |                |        |        |       |        |                |
| ENSRNOG00000008917   | Ehbp1          | -0.072 |        |       | -0.119 | -0.517 0.196   |
| 0.435 8.85E-03       |                |        |        |       |        |                |
| ENSRNOG00000010941   | Tifa           | 0.301  | 0.760  | 1.232 | -0.567 | -0.974         |
| 8.85E-03             |                |        |        |       |        |                |
| ENSRNOG00000005679   | Fap            | 0.346  | 0.280  | 0.967 | -0.551 | -0.826         |
| 8.86E-03             |                |        |        |       |        |                |
| ENSRNOG00000019730   | Inpp1          | 0.064  | 0.331  | 0.499 | -0.314 | -0.510         |
| 8.89E-03             |                |        |        |       |        |                |
| ENSRNOG00000057352   | AABR07054593.1 | -0.013 |        |       | 0.339  | 0.741 -0.230   |
| -0.700 8.89E-03      |                |        |        |       |        |                |
| ENSRNOG00000016368   | Ppp1r14c       | -0.522 |        |       | 3.228  | 4.893 -2.876 - |
| 3.664 8.90E-03       |                |        |        |       |        |                |
| ENSRNOG00000007964   | Tp53inp1       | -0.148 |        |       | 0.982  | 1.228 -0.846 - |
| 0.942 8.91E-03       |                |        |        |       |        |                |
| ENSRNOG00000006224   | Klhl31         | 0.126  | -0.385 |       | -1.325 | 0.270          |
| 0.799 9.02E-03       |                |        |        |       |        |                |
| ENSRNOG00000010633   | Acs11          | -0.607 |        |       | -0.382 | -0.630 0.303   |
| 0.788 9.02E-03       |                |        |        |       |        |                |
| ENSRNOG00000047565   | LOC100911186   | -0.172 |        |       | -0.152 | -0.599         |
| 0.361 0.746 9.02E-03 |                |        |        |       |        |                |
| ENSRNOG00000001288   | Gpr146         | -0.027 |        |       | 0.019  | -0.358 0.234   |
| 0.723 9.02E-03       |                |        |        |       |        |                |
| ENSRNOG00000033883   | Stard8         | -0.023 |        |       | 0.112  | 0.324 -0.242 - |
| 0.447 9.02E-03       |                |        |        |       |        |                |
| ENSRNOG00000012794   | Grhpr          | 0.328  | -0.364 |       | -1.254 | 0.373 0.808    |
| 9.04E-03             |                |        |        |       |        |                |
| ENSRNOG00000014064   | Ctsh           | 0.372  | 0.147  | 0.627 | -0.350 | -0.647         |
| 9.05E-03             |                |        |        |       |        |                |
| ENSRNOG00000018951   | Col4a5         | 0.146  | 0.036  | 0.316 | -0.278 | -0.605         |
| 9.09E-03             |                |        |        |       |        |                |
| ENSRNOG00000015217   | Ltv1           | 0.000  | 0.085  | 0.395 | -0.068 | -0.368         |
| 9.12E-03             |                |        |        |       |        |                |

|                     |              |          |        |        |        |        |
|---------------------|--------------|----------|--------|--------|--------|--------|
| ENSRNOG00000004430  | Cep131       | 0.096    | -0.100 | -0.584 | 0.203  |        |
| 0.536               | 9.12E-03     |          |        |        |        |        |
| ENSRNOG00000001580  | Hoxd9        | -3.201   | -0.247 | -0.654 | 0.515  |        |
| 1.213               | 9.14E-03     |          |        |        |        |        |
| ENSRNOG00000019039  | Inpp5e       | -0.095   | -0.203 | -0.425 |        |        |
| 0.184               | 0.329        | 9.17E-03 |        |        |        |        |
| ENSRNOG000000056069 | Kif11        | 0.088    | 0.750  | 1.914  | -1.080 | -1.882 |
| 9.20E-03            |              |          |        |        |        |        |
| ENSRNOG00000001682  | Ttc3         | 0.054    | 0.075  | 0.371  | -0.181 | -0.444 |
| 9.23E-03            |              |          |        |        |        |        |
| ENSRNOG000000013949 | Idh2         | -0.654   | -0.190 | -0.532 | 0.321  |        |
| 0.801               | 9.25E-03     |          |        |        |        |        |
| ENSRNOG000000042449 | LOC100362023 | -0.013   | 0.339  | 0.495  | -0.352 |        |
| -0.356              | 9.28E-03     |          |        |        |        |        |
| ENSRNOG000000026061 | RGD1566226   | -0.300   | 2.893  | 4.578  | -2.629 | -      |
| 4.029               | 9.33E-03     |          |        |        |        |        |
| ENSRNOG000000011222 | Dynl11       | 0.493    | 0.312  | 0.928  | -0.173 | -0.793 |
| 9.35E-03            |              |          |        |        |        |        |
| ENSRNOG000000059834 | Cib2         | 0.945    | -0.607 | -1.804 | 0.585  | 1.137  |
| 9.36E-03            |              |          |        |        |        |        |
| ENSRNOG000000033765 | Eif1         | 0.203    | -0.213 | -0.482 | 0.298  | 0.442  |
| 9.36E-03            |              |          |        |        |        |        |
| ENSRNOG000000024437 | Blcap        | 0.053    | -0.030 | -0.504 | 0.074  | 0.414  |
| 9.36E-03            |              |          |        |        |        |        |
| ENSRNOG000000019620 | Pmf1         | 0.194    | 0.298  | 0.698  | -0.189 | -0.826 |
| 9.36E-03            |              |          |        |        |        |        |
| ENSRNOG000000000387 | Slc25a16     | -0.106   | 0.215  | 0.672  | -0.326 | -      |
| 0.521               | 9.39E-03     |          |        |        |        |        |
| ENSRNOG000000019525 | Hspa9        | -0.237   | -0.286 | -0.536 | 0.167  |        |
| 0.514               | 9.39E-03     |          |        |        |        |        |
| ENSRNOG000000003278 | Map3k14      | 0.233    | 0.921  | 1.232  | -0.548 | -0.833 |
| 9.41E-03            |              |          |        |        |        |        |
| ENSRNOG000000033261 | Fam107a      | -0.225   | -0.292 | -0.654 |        |        |
| 0.587               | 0.987        | 9.41E-03 |        |        |        |        |
| ENSRNOG000000000979 | Bri3bp       | -0.049   | 0.409  | 0.509  | -0.550 | -      |
| 0.720               | 9.41E-03     |          |        |        |        |        |
| ENSRNOG000000022523 | Fkbp5        | 0.159    | -0.243 | -0.781 | 0.294  | 0.930  |
| 9.49E-03            |              |          |        |        |        |        |
| ENSRNOG000000018454 | Apoe         | 0.244    | 0.569  | 1.550  | -0.342 | -1.056 |
| 9.55E-03            |              |          |        |        |        |        |
| ENSRNOG000000008933 | Plbd1        | -0.081   | -0.288 | -0.489 | 0.181  |        |
| 0.373               | 9.55E-03     |          |        |        |        |        |
| ENSRNOG000000010512 | Yipf1        | -0.030   | 0.283  | 0.503  | -0.151 | -0.336 |
| 9.59E-03            |              |          |        |        |        |        |
| ENSRNOG000000028460 | Lrrc8e       | 1.104    | 0.111  | 0.827  | -2.436 | -1.731 |
| 9.63E-03            |              |          |        |        |        |        |
| ENSRNOG000000008897 | Gga1         | 0.027    | -0.037 | -0.351 | 0.112  | 0.348  |
| 9.68E-03            |              |          |        |        |        |        |
| ENSRNOG000000032048 | Zfp462       | 0.309    | -0.418 | -0.800 | 0.345  |        |
| 0.740               | 9.70E-03     |          |        |        |        |        |
| ENSRNOG000000023851 | Igsf3        | -0.145   | 0.144  | 0.691  | -0.477 | -0.744 |
| 9.70E-03            |              |          |        |        |        |        |
| ENSRNOG000000047741 | E2f2         | 0.312    | 0.272  | 0.482  | -0.549 | -0.887 |
| 9.70E-03            |              |          |        |        |        |        |

|                      |                |        |        |        |        |        |
|----------------------|----------------|--------|--------|--------|--------|--------|
| ENSRNOG00000052128   | Clec2e         | 0.716  | 0.716  | 2.693  | -0.954 | -2.384 |
| 9.70E-03             |                |        |        |        |        |        |
| ENSRNOG00000037137   | Svip           | 0.101  | -0.322 | -0.754 | 0.270  | 0.487  |
| 9.78E-03             |                |        |        |        |        |        |
| ENSRNOG00000003884   | Acmsd          | -2.216 | -0.319 | -1.812 | 1.338  |        |
| 1.912 9.79E-03       |                |        |        |        |        |        |
| ENSRNOG00000017084   | Hsd11b2        | -0.524 | 1.624  | 3.188  | -1.448 | -      |
| 2.224 9.84E-03       |                |        |        |        |        |        |
| ENSRNOG00000001455   | Kif13a         | -0.168 | -0.036 | -0.454 |        |        |
| 0.065 0.435 9.85E-03 |                |        |        |        |        |        |
| ENSRNOG00000020284   | Prkar2a        | 0.115  | -0.274 | -0.803 | 0.182  |        |
| 0.515 9.85E-03       |                |        |        |        |        |        |
| ENSRNOG000000040350  | Mir675         | 0.264  | 0.881  | 1.185  | -0.519 | -1.028 |
| 9.90E-03             |                |        |        |        |        |        |
| ENSRNOG000000018651  | Agtppb1        | 0.435  | -0.300 | -1.046 | 0.284  |        |
| 0.703 9.91E-03       |                |        |        |        |        |        |
| ENSRNOG000000010697  | Hadh           | -0.506 | -0.306 | -0.575 | 0.323  |        |
| 0.731 9.92E-03       |                |        |        |        |        |        |
| ENSRNOG000000004449  | E2f6           | -0.123 | -0.261 | -0.605 | 0.220  |        |
| 0.489 9.92E-03       |                |        |        |        |        |        |
| ENSRNOG000000017166  | Mycbp          | -0.001 | 0.148  | 0.315  | -0.224 | -0.412 |
| 9.92E-03             |                |        |        |        |        |        |
| ENSRNOG000000047656  | Gaa            | 0.052  | -0.003 | -0.407 | 0.079  | 0.443  |
| 9.93E-03             |                |        |        |        |        |        |
| ENSRNOG000000026519  | AABR07044711.1 | 0.165  | -0.309 | -1.433 |        |        |
| 0.226 0.832 9.93E-03 |                |        |        |        |        |        |
| ENSRNOG000000019843  | St3gal3        | 0.234  | -0.092 | -0.523 | 0.245  |        |
| 0.450 9.93E-03       |                |        |        |        |        |        |
| ENSRNOG000000039454  | Pcdhgb7        | -0.443 | -0.212 | -0.336 |        |        |
| 0.672 0.879 9.94E-03 |                |        |        |        |        |        |
| ENSRNOG000000013514  | Maf1           | 0.133  | -0.176 | -0.450 | 0.249  | 0.360  |
| 9.94E-03             |                |        |        |        |        |        |
| ENSRNOG000000008829  | Sorbs3         | -0.242 | -0.207 | -0.421 |        |        |
| 0.239 0.619 9.96E-03 |                |        |        |        |        |        |
| ENSRNOG000000012262  | Depdc7         | -0.184 | 0.517  | 1.421  | -0.718 | -      |
| 1.169 9.96E-03       |                |        |        |        |        |        |
| ENSRNOG000000055111  | AABR07000658.1 | 0.243  | 0.421  | 1.627  | -1.039 | -      |
| 2.254 9.96E-03       |                |        |        |        |        |        |
| ENSRNOG000000040108  | Cd36           | -0.851 | -0.618 | -0.447 | 0.613  |        |
| 1.120 9.97E-03       |                |        |        |        |        |        |
| ENSRNOG000000017513  | Fam73b         | -0.270 | -0.304 | -0.766 |        |        |
| 0.338 0.631 9.97E-03 |                |        |        |        |        |        |
| ENSRNOG000000018425  | Dym            | 0.379  | -0.146 | -0.756 | 0.201  | 0.537  |
| 9.97E-03             |                |        |        |        |        |        |
| ENSRNOG000000007111  | Nrd1           | 0.190  | -0.133 | -0.453 | 0.105  | 0.351  |
| 9.97E-03             |                |        |        |        |        |        |
| ENSRNOG000000020713  | Osbp15         | -0.056 | 0.171  | 0.547  | -0.332 | -      |
| 0.449 9.97E-03       |                |        |        |        |        |        |
| ENSRNOG000000033844  | LOC100912195   | 0.188  | 0.981  | 1.907  | -0.842 | -      |
| 1.307 9.97E-03       |                |        |        |        |        |        |
| ENSRNOG000000039658  | G4             | -0.136 | -0.234 | -0.391 | 0.274  |        |
| 0.380 9.98E-03       |                |        |        |        |        |        |
| ENSRNOG000000008103  | Mdh1           | -0.542 | -0.453 | -0.800 | 0.406  |        |
| 0.933 1.00E-02       |                |        |        |        |        |        |

|                    |                |          |          |        |        |        |
|--------------------|----------------|----------|----------|--------|--------|--------|
| ENSRNOG00000019674 | Tmem180        | 0.077    | -0.023   | -0.391 | 0.216  |        |
| 0.479              |                | 1.00E-02 |          |        |        |        |
| ENSRNOG00000021732 | Hsf1           | 0.057    | -0.147   | -0.383 | 0.209  | 0.346  |
| 1.00E-02           |                |          |          |        |        |        |
| ENSRNOG00000020837 | Cd300lg        | -0.205   | -1.027   | -1.400 |        |        |
| 1.141              |                | 1.890    | 1.00E-02 |        |        |        |
| ENSRNOG00000057139 | Myoz3          | 0.002    | -0.335   | -1.229 | 0.263  | 0.819  |
| 1.00E-02           |                |          |          |        |        |        |
| ENSRNOG00000009191 | Ccm21          | -0.290   | -0.169   | -0.521 | 0.405  |        |
| 0.680              |                | 1.00E-02 |          |        |        |        |
| ENSRNOG00000057040 | Spns2          | -0.052   | -0.158   | -0.580 | 0.191  |        |
| 0.674              |                | 1.00E-02 |          |        |        |        |
| ENSRNOG00000010830 | Slc25a4        | -0.039   | -0.343   | -0.833 |        |        |
| 0.261              |                | 0.567    | 1.00E-02 |        |        |        |
| ENSRNOG00000030579 | Zfp853         | 0.581    | 0.739    | 0.888  | -0.870 | -1.116 |
| 1.00E-02           |                |          |          |        |        |        |
| ENSRNOG00000028082 | Tal2           | -0.170   | 1.884    | 3.203  | -2.552 | -2.533 |
| 1.00E-02           |                |          |          |        |        |        |
| ENSRNOG00000003018 | Olfml2b        | 0.036    | 0.030    | 0.794  | -0.188 | -0.851 |
| 1.00E-02           |                |          |          |        |        |        |
| ENSRNOG00000031979 | Mt-atp6        | -0.436   | -0.344   | -0.648 |        |        |
| 0.295              |                | 0.682    | 1.01E-02 |        |        |        |
| ENSRNOG00000019249 | Ap3b2          | 0.451    | 0.841    | 1.442  | -0.616 | -2.502 |
| 1.01E-02           |                |          |          |        |        |        |
| ENSRNOG00000025890 | Opa3           | -0.019   | -0.124   | -0.618 | 0.107  |        |
| 0.425              |                | 1.03E-02 |          |        |        |        |
| ENSRNOG00000022189 | Htatif2        | -0.293   | 0.650    | 1.362  | -0.618 | -      |
| 0.856              |                | 1.03E-02 |          |        |        |        |
| ENSRNOG00000046005 | Scd2           | -0.206   | 1.079    | 1.412  | -0.863 | -1.133 |
| 1.03E-02           |                |          |          |        |        |        |
| ENSRNOG00000037659 | Mto1           | -0.101   | -0.391   | -0.509 | 0.152  |        |
| 0.389              |                | 1.03E-02 |          |        |        |        |
| ENSRNOG00000020087 | Zfp90          | 0.023    | 0.381    | 0.854  | -0.495 | -0.915 |
| 1.04E-02           |                |          |          |        |        |        |
| ENSRNOG00000027264 | Dagla          | 0.079    | -0.213   | -0.941 | 0.196  | 0.722  |
| 1.04E-02           |                |          |          |        |        |        |
| ENSRNOG00000023841 | Cd99l2         | 0.303    | 0.599    | 0.830  | -0.633 | -1.168 |
| 1.04E-02           |                |          |          |        |        |        |
| ENSRNOG00000010099 | Asb8           | 0.088    | -0.131   | -0.454 | 0.097  | 0.349  |
| 1.04E-02           |                |          |          |        |        |        |
| ENSRNOG00000009845 | Acadm          | -0.384   | -0.485   | -0.702 | 0.422  |        |
| 0.822              |                | 1.04E-02 |          |        |        |        |
| ENSRNOG00000019590 | Smg5           | -0.007   | -0.018   | -0.227 | 0.037  |        |
| 0.277              |                | 1.04E-02 |          |        |        |        |
| ENSRNOG00000005574 | Adamts8        | -0.137   | -0.200   | 0.654  | -0.986 |        |
| -1.621             |                | 1.04E-02 |          |        |        |        |
| ENSRNOG00000021789 | RGD1565323     | 0.618    | -0.718   | -2.231 | 0.293  |        |
| 1.478              |                | 1.05E-02 |          |        |        |        |
| ENSRNOG00000009373 | AABR07069599.1 | 0.251    | -0.310   | -1.120 |        |        |
| 0.299              |                | 0.701    | 1.05E-02 |        |        |        |
| ENSRNOG00000025742 | Lmnb2          | -0.007   | 0.958    | 1.714  | -1.185 | -1.546 |
| 1.05E-02           |                |          |          |        |        |        |
| ENSRNOG00000045665 | Amigo1         | -0.093   | -0.088   | -0.380 |        |        |
| 0.084              |                | 0.461    | 1.05E-02 |        |        |        |

|                      |              |        |        |        |        |        |
|----------------------|--------------|--------|--------|--------|--------|--------|
| ENSRNOG00000000780   | Ppplr11      | 0.062  | 0.237  | 0.405  | -0.151 | -0.289 |
| 1.05E-02             |              |        |        |        |        |        |
| ENSRNOG00000003661   | Hn1          | 0.335  | 0.320  | 0.349  | -0.309 | -0.511 |
| 1.05E-02             |              |        |        |        |        |        |
| ENSRNOG000000047712  | Dcx          | 0.348  | 0.533  | 0.982  | -1.096 | -1.673 |
| 1.05E-02             |              |        |        |        |        |        |
| ENSRNOG000000022710  | Prrg4        | -0.537 | 2.213  | 3.655  | -2.244 | -2.437 |
| 1.05E-02             |              |        |        |        |        |        |
| ENSRNOG000000038372  | Ndufs2       | -0.267 | -0.259 | -0.643 |        |        |
| 0.253 0.584 1.05E-02 |              |        |        |        |        |        |
| ENSRNOG000000019267  | Dkk4         | -0.073 | -0.156 | -0.346 | 0.172  |        |
| 0.390 1.05E-02       |              |        |        |        |        |        |
| ENSRNOG000000005045  | Ppp2r5e      | 0.008  | -0.079 | -0.276 | 0.087  |        |
| 0.266 1.06E-02       |              |        |        |        |        |        |
| ENSRNOG000000005147  | Ccdc157      | -0.265 | -0.242 | -0.881 |        |        |
| 0.143 0.659 1.07E-02 |              |        |        |        |        |        |
| ENSRNOG000000017215  | RGD1308601   | -0.038 | -0.094 | -0.512 |        |        |
| 0.052 0.393 1.07E-02 |              |        |        |        |        |        |
| ENSRNOG000000006608  | Tmem70       | -0.175 | -0.286 | -0.613 |        |        |
| 0.229 0.493 1.09E-02 |              |        |        |        |        |        |
| ENSRNOG000000002863  | Cacna1e      | -4.061 | -1.366 | -2.465 |        |        |
| 1.363 4.185 1.09E-02 |              |        |        |        |        |        |
| ENSRNOG000000036677  | Slc16a3      | -0.015 | -0.354 | -1.740 |        |        |
| 0.344 1.063 1.09E-02 |              |        |        |        |        |        |
| ENSRNOG000000009934  | Emc3         | 0.171  | 0.379  | 0.484  | -0.342 | -0.457 |
| 1.09E-02             |              |        |        |        |        |        |
| ENSRNOG000000007262  | Ccdc134      | 0.107  | 0.313  | 0.647  | -0.338 | -0.628 |
| 1.09E-02             |              |        |        |        |        |        |
| ENSRNOG000000046204  | Tspan15      | 0.195  | 0.730  | 1.013  | -0.589 | -0.886 |
| 1.09E-02             |              |        |        |        |        |        |
| ENSRNOG000000011329  | Pkm          | 0.131  | -0.320 | -1.406 | 0.276  | 0.837  |
| 1.09E-02             |              |        |        |        |        |        |
| ENSRNOG000000010227  | Gpatch21     | 0.051  | 0.181  | 0.304  | -0.277 | -0.341 |
| 1.09E-02             |              |        |        |        |        |        |
| ENSRNOG000000055068  | LOC100360977 | 0.072  | 0.279  | 0.723  | -0.239 | -      |
| 0.522 1.10E-02       |              |        |        |        |        |        |
| ENSRNOG000000021174  | Macrodl      | 0.090  | -0.298 | -0.958 | 0.380  |        |
| 0.662 1.10E-02       |              |        |        |        |        |        |
| ENSRNOG000000006238  | Traf2        | -0.041 | 0.466  | 0.679  | -0.361 | -0.487 |
| 1.10E-02             |              |        |        |        |        |        |
| ENSRNOG000000020843  | Ftl1         | 0.028  | 0.451  | 1.163  | -0.208 | -0.628 |
| 1.11E-02             |              |        |        |        |        |        |
| ENSRNOG000000012574  | LOC499339    | 0.051  | 0.401  | 0.666  | -0.477 | -0.508 |
| 1.11E-02             |              |        |        |        |        |        |
| ENSRNOG000000048897  | Vmac         | -0.312 | -0.220 | -0.307 | 0.265  |        |
| 0.585 1.12E-02       |              |        |        |        |        |        |
| ENSRNOG000000013431  | Rsbnl1       | -0.010 | -0.335 | -0.713 |        |        |
| 0.241 0.427 1.12E-02 |              |        |        |        |        |        |
| ENSRNOG000000018412  | Sfi1         | -0.039 | 0.248  | 0.493  | -0.275 | -0.393 |
| 1.12E-02             |              |        |        |        |        |        |
| ENSRNOG000000014371  | Cdh13        | 0.061  | 0.567  | 0.849  | -0.432 | -0.580 |
| 1.14E-02             |              |        |        |        |        |        |
| ENSRNOG000000004205  | Pkdcc        | -0.084 | -0.458 | -0.948 | 0.517  |        |
| 0.770 1.14E-02       |              |        |        |        |        |        |

|                    |                |          |        |        |        |        |
|--------------------|----------------|----------|--------|--------|--------|--------|
| ENSRNOG00000017079 | Pgm211         | 0.148    | -0.225 | -0.778 | 0.292  |        |
| 0.724              | 1.14E-02       |          |        |        |        |        |
| ENSRNOG00000019278 | Fsd2           | -0.039   | -0.284 | -1.074 | 0.227  |        |
| 0.615              | 1.14E-02       |          |        |        |        |        |
| ENSRNOG00000015679 | Dok4           | 0.135    | -0.020 | 0.136  | -0.114 | -0.610 |
| 1.14E-02           |                |          |        |        |        |        |
| ENSRNOG00000038091 | Sohlh2         | -0.070   | 3.667  | 5.055  | -3.595 | -      |
| 5.284              | 1.14E-02       |          |        |        |        |        |
| ENSRNOG00000045821 | Slc41a3        | -0.026   | -0.644 | -2.018 |        |        |
| 0.445              | 1.291          | 1.14E-02 |        |        |        |        |
| ENSRNOG00000014761 | Rasd2          | -0.233   | -0.147 | -1.150 | 0.500  |        |
| 1.221              | 1.14E-02       |          |        |        |        |        |
| ENSRNOG00000018009 | Rab8b          | 0.117    | 0.209  | 0.461  | -0.367 | -0.402 |
| 1.14E-02           |                |          |        |        |        |        |
| ENSRNOG00000020518 | Fam189b        | 0.085    | -0.309 | -0.895 | 0.288  |        |
| 0.612              | 1.14E-02       |          |        |        |        |        |
| ENSRNOG00000020167 | Reep5          | 0.292    | -0.072 | -0.447 | 0.125  | 0.341  |
| 1.14E-02           |                |          |        |        |        |        |
| ENSRNOG00000007325 | Usp28          | 0.057    | 0.408  | 0.642  | -0.440 | -0.562 |
| 1.14E-02           |                |          |        |        |        |        |
| ENSRNOG00000020853 | Scap           | -0.065   | 0.253  | 0.429  | -0.192 | -0.366 |
| 1.14E-02           |                |          |        |        |        |        |
| ENSRNOG00000061326 | AABR07054487.1 | -0.065   | -2.095 | -0.803 | -2.010 |        |
| 3.052              | 1.15E-02       |          |        |        |        |        |
| ENSRNOG00000019318 | Syt3           | -0.567   | 0.154  | -0.573 | 0.390  | 1.122  |
| 1.15E-02           |                |          |        |        |        |        |
| ENSRNOG00000017149 | Fam131b        | 0.102    | -0.381 | -1.065 | 0.357  |        |
| 0.727              | 1.15E-02       |          |        |        |        |        |
| ENSRNOG00000006649 | Thrb           | -0.055   | -0.221 | -0.490 | 0.170  |        |
| 0.443              | 1.15E-02       |          |        |        |        |        |
| ENSRNOG00000021232 | Ddrgk1         | 0.135    | -0.226 | -0.571 | 0.286  |        |
| 0.393              | 1.15E-02       |          |        |        |        |        |
| ENSRNOG00000052493 | AABR07068327.1 | -1.219   | -0.259 | 1.290  | 1.658  | -1.052 |
| 1.16E-02           |                |          |        |        |        |        |
| ENSRNOG00000051420 | Cables2        | 0.045    | 0.651  | 1.042  | -0.524 | -0.682 |
| 1.16E-02           |                |          |        |        |        |        |
| ENSRNOG00000050510 | LOC100363782   | 0.096    | -0.005 | -0.119 | -0.397 |        |
| 0.298              | 1.17E-02       |          |        |        |        |        |
| ENSRNOG00000055300 | Ncapd2         | 0.110    | 0.204  | 0.485  | -0.304 | -0.529 |
| 1.17E-02           |                |          |        |        |        |        |
| ENSRNOG00000000563 | Adamts14       | 0.007    | 0.353  | 1.068  | -0.416 | -0.929 |
| 1.17E-02           |                |          |        |        |        |        |
| ENSRNOG00000014128 | Ecsit          | -0.133   | -0.249 | -0.636 | 0.258  |        |
| 0.509              | 1.17E-02       |          |        |        |        |        |
| ENSRNOG00000019557 | Asb18          | -0.834   | -0.692 | -1.643 | 0.583  |        |
| 1.285              | 1.17E-02       |          |        |        |        |        |
| ENSRNOG00000001687 | Crybg3         | 0.076    | -0.247 | -0.432 | 0.320  |        |
| 0.518              | 1.18E-02       |          |        |        |        |        |
| ENSRNOG00000057834 | AABR07013701.1 | -2.175   | -0.103 | 0.412  | 1.625  | -0.473 |
| 1.18E-02           |                |          |        |        |        |        |
| ENSRNOG00000051977 | Mmrn2          | -0.079   | -0.007 | -0.278 | 0.140  |        |
| 0.551              | 1.18E-02       |          |        |        |        |        |
| ENSRNOG00000009104 | Fnip1          | 0.040    | -0.280 | -0.745 | 0.117  | 0.574  |
| 1.18E-02           |                |          |        |        |        |        |

|                    |           |          |        |        |        |        |
|--------------------|-----------|----------|--------|--------|--------|--------|
| ENSRNOG00000048187 | LOC691153 | -0.485   | 0.052  | -0.637 | 0.391  |        |
| 1.481              | 1.18E-02  |          |        |        |        |        |
| ENSRNOG00000050210 | RT1-CE10  | -0.057   | 0.991  | 1.487  | -0.351 | -      |
| 0.731              | 1.19E-02  |          |        |        |        |        |
| ENSRNOG00000012181 | Lpl       | -0.947   | -0.624 | -0.402 | 0.597  |        |
| 1.044              | 1.19E-02  |          |        |        |        |        |
| ENSRNOG00000020029 | Fam195a   | -0.230   | -0.265 | -0.789 |        |        |
| 0.225              | 0.761     | 1.19E-02 |        |        |        |        |
| ENSRNOG00000047276 | Pkm       | 0.162    | -0.292 | -1.416 | 0.248  | 0.820  |
| 1.19E-02           |           |          |        |        |        |        |
| ENSRNOG00000027724 | Plekhf1   | -0.006   | -0.392 | -0.688 |        |        |
| 0.544              | 0.605     | 1.19E-02 |        |        |        |        |
| ENSRNOG00000042668 | Msr3      | 0.048    | -0.147 | -0.542 | 0.082  | 0.355  |
| 1.19E-02           |           |          |        |        |        |        |
| ENSRNOG00000014616 | Iars      | -0.033   | -0.153 | -0.364 | 0.084  |        |
| 0.324              | 1.19E-02  |          |        |        |        |        |
| ENSRNOG00000018044 | Phyh      | -0.284   | -0.262 | -0.713 | 0.207  |        |
| 0.591              | 1.19E-02  |          |        |        |        |        |
| ENSRNOG00000048567 | Ankmy1    | 0.354    | 0.363  | 0.776  | -1.005 | -1.173 |
| 1.19E-02           |           |          |        |        |        |        |
| ENSRNOG00000017243 | Bnip3     | 0.071    | -0.215 | -0.437 | 0.077  | 0.474  |
| 1.19E-02           |           |          |        |        |        |        |
| ENSRNOG00000028254 | Tmem141   | 0.047    | -0.213 | -0.460 | 0.291  |        |
| 0.440              | 1.19E-02  |          |        |        |        |        |
| ENSRNOG00000007060 | Plin2     | -0.334   | 0.430  | 0.899  | -0.326 | -0.744 |
| 1.20E-02           |           |          |        |        |        |        |
| ENSRNOG00000054625 | Fhod1     | 0.211    | -0.190 | -0.752 | 0.254  | 0.503  |
| 1.20E-02           |           |          |        |        |        |        |
| ENSRNOG00000023023 | Trpt1     | 0.046    | -0.305 | -0.858 | 0.328  | 0.600  |
| 1.20E-02           |           |          |        |        |        |        |
| ENSRNOG00000053288 | Ank3      | 0.138    | -0.199 | -0.654 | 0.069  | 0.486  |
| 1.20E-02           |           |          |        |        |        |        |
| ENSRNOG00000002749 | Spag9     | -0.045   | -0.176 | -0.508 | 0.044  |        |
| 0.401              | 1.20E-02  |          |        |        |        |        |
| ENSRNOG00000055000 | Zkscan3   | -0.182   | -0.192 | -0.398 |        |        |
| 0.194              | 0.264     | 1.21E-02 |        |        |        |        |
| ENSRNOG00000007607 | Nr4a1     | -0.060   | -0.699 | -1.674 | 0.804  |        |
| 1.338              | 1.21E-02  |          |        |        |        |        |
| ENSRNOG00000005326 | Cnrip1    | 0.780    | 0.009  | 0.537  | -0.324 | -0.911 |
| 1.21E-02           |           |          |        |        |        |        |
| ENSRNOG00000010940 | Acad11    | 0.048    | -0.337 | -0.410 | 0.274  |        |
| 0.706              | 1.21E-02  |          |        |        |        |        |
| ENSRNOG00000029042 | Mt-nd6    | -0.388   | -0.277 | -0.699 |        |        |
| 0.179              | 0.657     | 1.21E-02 |        |        |        |        |
| ENSRNOG00000028384 | Npepl1    | 0.093    | -0.230 | -0.612 | 0.239  |        |
| 0.416              | 1.21E-02  |          |        |        |        |        |
| ENSRNOG00000009708 | Tasl1     | -0.255   | -0.570 | -1.127 |        |        |
| 0.525              | 0.931     | 1.22E-02 |        |        |        |        |
| ENSRNOG00000009155 | Ndufs3    | -0.118   | -0.325 | -0.829 |        |        |
| 0.270              | 0.571     | 1.22E-02 |        |        |        |        |
| ENSRNOG00000019677 | Arid3b    | 0.280    | -0.341 | -0.923 | 0.272  |        |
| 0.726              | 1.22E-02  |          |        |        |        |        |
| ENSRNOG00000018114 | Acadv1    | -0.515   | -0.289 | -0.409 |        |        |
| 0.291              | 0.651     | 1.23E-02 |        |        |        |        |

|                    |                |          |        |        |        |        |        |
|--------------------|----------------|----------|--------|--------|--------|--------|--------|
| ENSRNOG00000015191 | Phc1           | 0.173    | -0.261 | -0.848 | 0.265  | 0.542  |        |
| 1.23E-02           |                |          |        |        |        |        |        |
| ENSRNOG00000026493 | Cdnf           | 0.354    | -0.108 | -1.091 | 0.145  | 0.750  |        |
| 1.24E-02           |                |          |        |        |        |        |        |
| ENSRNOG00000021241 | Gfra4          | 0.086    | -0.284 | -1.568 | 0.292  | 1.227  |        |
| 1.24E-02           |                |          |        |        |        |        |        |
| ENSRNOG00000002258 | Tmem150c       | -0.247   |        | -0.194 |        | -0.858 |        |
| 0.178              | 0.855          | 1.24E-02 |        |        |        |        |        |
| ENSRNOG00000020659 | Mrpl4          | -0.105   |        | -0.216 |        | -0.542 | 0.235  |
| 0.440              | 1.24E-02       |          |        |        |        |        |        |
| ENSRNOG00000016032 | Cnm3           | -0.098   |        | -0.122 |        | -0.534 | 0.237  |
| 0.411              | 1.24E-02       |          |        |        |        |        |        |
| ENSRNOG00000016907 | Ppp5c          | -0.037   |        | -0.157 |        | -0.443 | 0.165  |
| 0.318              | 1.24E-02       |          |        |        |        |        |        |
| ENSRNOG00000024494 | AABR07056633.1 | 0.339    | 3.098  | 3.554  | -2.168 |        | -      |
| 2.565              | 1.24E-02       |          |        |        |        |        |        |
| ENSRNOG00000018755 | Acss2          | -0.256   |        | -0.230 |        | -0.703 | 0.367  |
| 0.712              | 1.24E-02       |          |        |        |        |        |        |
| ENSRNOG00000007316 | Idh3B          | -0.236   |        | -0.244 |        | -0.559 | 0.208  |
| 0.540              | 1.24E-02       |          |        |        |        |        |        |
| ENSRNOG00000005749 | Foxred2        | 0.229    | 0.409  | 0.858  | -0.413 |        | -0.794 |
| 1.24E-02           |                |          |        |        |        |        |        |
| ENSRNOG00000017120 | Abhd2          | -0.200   | 0.760  | 1.319  | -0.988 |        | -0.918 |
| 1.24E-02           |                |          |        |        |        |        |        |
| ENSRNOG00000002303 | Kcnj12         | 0.272    | -0.356 |        | -1.223 |        | 0.326  |
| 0.847              | 1.24E-02       |          |        |        |        |        |        |
| ENSRNOG00000017035 | Cep120         | 0.115    | 0.041  | 0.167  | -0.198 |        | -0.275 |
| 1.25E-02           |                |          |        |        |        |        |        |
| ENSRNOG00000058289 | AABR07027575.1 | -0.045   |        | 1.088  | 1.593  | -1.227 |        |
| -1.500             | 1.25E-02       |          |        |        |        |        |        |
| ENSRNOG00000020392 | Stxbp3         | 0.117    | -0.283 |        | -0.566 |        | 0.194  |
| 0.433              | 1.26E-02       |          |        |        |        |        |        |
| ENSRNOG00000008519 | RGD1309079     | -0.118   | 0.142  | 0.703  | -0.215 |        | -      |
| 0.622              | 1.27E-02       |          |        |        |        |        |        |
| ENSRNOG00000058456 | AABR07051177.1 | 0.223    | 0.144  | 0.913  | -0.246 |        | -      |
| 1.332              | 1.27E-02       |          |        |        |        |        |        |
| ENSRNOG00000007461 | Klhl41         | 0.049    | 0.414  | 0.693  | -0.464 |        | -0.526 |
| 1.27E-02           |                |          |        |        |        |        |        |
| ENSRNOG00000001765 | Slc51a         | -0.809   | 2.850  | 3.918  | -2.476 |        | -      |
| 2.629              | 1.27E-02       |          |        |        |        |        |        |
| ENSRNOG00000021536 | Plxdc1         | -0.478   | 0.239  | 1.305  | -0.321 |        | -      |
| 0.977              | 1.27E-02       |          |        |        |        |        |        |
| ENSRNOG00000055608 | Zfp94          | -0.353   | -0.481 |        | -0.922 |        | 0.463  |
| 0.797              | 1.27E-02       |          |        |        |        |        |        |
| ENSRNOG00000026286 | Nhlrc1         | -0.018   |        | -0.142 |        | -1.098 |        |
| 0.273              | 0.878          | 1.28E-02 |        |        |        |        |        |
| ENSRNOG00000042179 | Cfap20         | 0.025    | 0.040  | 0.413  | -0.091 |        | -0.352 |
| 1.28E-02           |                |          |        |        |        |        |        |
| ENSRNOG00000003243 | Wdr81          | -0.059   | 0.204  | 0.446  | -0.162 |        | -0.398 |
| 1.28E-02           |                |          |        |        |        |        |        |
| ENSRNOG00000007404 | Ccdc23         | 0.012    | 0.321  | 0.517  | -0.277 |        | -0.548 |
| 1.29E-02           |                |          |        |        |        |        |        |
| ENSRNOG00000012008 | S100a3         | -0.050   | 0.550  | 1.559  | -0.894 |        | -      |
| 1.499              | 1.29E-02       |          |        |        |        |        |        |



|                      |                |                    |             |             |        |  |
|----------------------|----------------|--------------------|-------------|-------------|--------|--|
| ENSRNOG00000014316   | Rapgef1        | -0.099             | -0.062      | -0.363      |        |  |
| 0.034 0.395 1.30E-02 |                |                    |             |             |        |  |
| ENSRNOG00000013009   | Ldha           | 0.239 -0.353       | -1.098      | 0.344 0.702 |        |  |
| 1.33E-02             |                |                    |             |             |        |  |
| ENSRNOG00000023520   | Cs             | -0.221             | -0.189      | -0.578      | 0.111  |  |
| 0.457 1.33E-02       |                |                    |             |             |        |  |
| ENSRNOG00000038610   | RGD1564688     | 0.294 -0.382       | -1.290      | 0.357       |        |  |
| 1.026 1.33E-02       |                |                    |             |             |        |  |
| ENSRNOG00000025512   | Mettl17        | -0.026             | -0.148      | -0.369      |        |  |
| 0.170 0.377 1.33E-02 |                |                    |             |             |        |  |
| ENSRNOG00000004152   | Lrp12          | -0.003             | 0.120 0.254 | -0.276      | -0.434 |  |
| 1.33E-02             |                |                    |             |             |        |  |
| ENSRNOG00000011723   | Slc44a3        | 0.530 0.803 1.875  | -1.674      | -1.436      |        |  |
| 1.33E-02             |                |                    |             |             |        |  |
| ENSRNOG00000018598   | Ankrd1         | -0.439             | 2.285 3.969 | -2.338      | -      |  |
| 2.435 1.33E-02       |                |                    |             |             |        |  |
| ENSRNOG00000015239   | Ginm1          | 0.327 -0.261       | -0.649      | 0.267 0.531 |        |  |
| 1.33E-02             |                |                    |             |             |        |  |
| ENSRNOG00000023035   | Smim8          | 0.110 -0.344       | -0.628      | 0.298 0.453 |        |  |
| 1.33E-02             |                |                    |             |             |        |  |
| ENSRNOG00000003782   | Acot9          | -0.073             | 0.458 0.888 | -0.480      | -0.678 |  |
| 1.35E-02             |                |                    |             |             |        |  |
| ENSRNOG00000006116   | Hk2            | 0.095 -0.309       | -0.614      | 0.309 0.614 |        |  |
| 1.36E-02             |                |                    |             |             |        |  |
| ENSRNOG00000004473   | Ppargcla       | -0.078             | -0.390      | -1.056      |        |  |
| 0.237 0.725 1.36E-02 |                |                    |             |             |        |  |
| ENSRNOG00000020281   | Kif22          | 0.440 0.619 1.522  | -0.555      | -1.268      |        |  |
| 1.36E-02             |                |                    |             |             |        |  |
| ENSRNOG00000017940   | Rere           | 0.040 -0.013       | -0.611      | 0.132 0.558 |        |  |
| 1.36E-02             |                |                    |             |             |        |  |
| ENSRNOG00000034126   | Pcdhga2        | 0.050 -0.338       | -0.747      | 0.359       |        |  |
| 0.704 1.37E-02       |                |                    |             |             |        |  |
| ENSRNOG00000021106   | Gramd1a        | -0.247             | -0.117      | -0.323      |        |  |
| 0.113 0.360 1.37E-02 |                |                    |             |             |        |  |
| ENSRNOG00000030478   | AY172581.9     | -0.204             | -0.286      | -0.592      |        |  |
| 0.349 0.869 1.37E-02 |                |                    |             |             |        |  |
| ENSRNOG00000016327   | Mcee           | -0.266             | -0.370      | -0.663      | 0.434  |  |
| 0.629 1.37E-02       |                |                    |             |             |        |  |
| ENSRNOG00000009033   | Cntn2          | 0.027 0.430 1.667  | -0.527      | -1.171      |        |  |
| 1.37E-02             |                |                    |             |             |        |  |
| ENSRNOG000000051943  | AABR07030854.2 | 0.230 -0.192       | -1.433      |             |        |  |
| 0.321 1.149 1.38E-02 |                |                    |             |             |        |  |
| ENSRNOG000000060905  | AC111831.2     | 0.227 0.084 0.808  | -0.671      | -1.317      |        |  |
| 1.38E-02             |                |                    |             |             |        |  |
| ENSRNOG00000025679   | Stk40          | 0.019 0.082 -0.292 | -0.005      | 0.357       |        |  |
| 1.38E-02             |                |                    |             |             |        |  |
| ENSRNOG00000019907   | Nfkbie         | -0.126             | 1.030 1.597 | -0.778      | -      |  |
| 0.811 1.39E-02       |                |                    |             |             |        |  |
| ENSRNOG000000046254  | Adgre1         | 0.035 0.356 0.912  | -0.375      | -0.765      |        |  |
| 1.39E-02             |                |                    |             |             |        |  |
| ENSRNOG00000019387   | Ifi30          | -0.047             | 0.084 0.693 | -0.089      | -0.557 |  |
| 1.39E-02             |                |                    |             |             |        |  |
| ENSRNOG000000050015  | LOC100910772   | -0.083             | 0.446 1.687 | -0.755      |        |  |
| -1.900 1.39E-02      |                |                    |             |             |        |  |

|                    |                |          |        |        |        |        |
|--------------------|----------------|----------|--------|--------|--------|--------|
| ENSRNOG00000033734 | Tnnt2          | -0.601   | 1.717  | 3.597  | -2.478 | -3.241 |
| 1.39E-02           |                |          |        |        |        |        |
| ENSRNOG00000057129 | AABR07049033.2 | -0.057   |        |        | -1.772 | -3.185 |
| 0.894              | 2.265          | 1.39E-02 |        |        |        |        |
| ENSRNOG00000019926 | Ramp1          | 0.277    | -0.710 |        | -1.111 | 0.810  |
| 1.39E-02           |                |          |        |        |        | 1.031  |
| ENSRNOG00000021314 | Fdft1          | -0.042   |        |        | -0.235 | -0.549 |
| 0.443              | 1.40E-02       |          |        |        |        | 0.247  |
| ENSRNOG00000003219 | Trim16         | -0.336   |        |        | -0.326 | -0.520 |
| 0.282              | 0.540          | 1.41E-02 |        |        |        |        |
| ENSRNOG00000001338 | Hpd            | -1.494   |        |        | -0.473 | -1.289 |
| 2.591              | 1.42E-02       |          |        |        |        | 0.808  |
| ENSRNOG00000054390 | AABR07050283.1 | 0.373    | -0.687 |        |        | -1.228 |
| 0.652              | 0.794          | 1.43E-02 |        |        |        |        |
| ENSRNOG00000001177 | Acads          | -0.483   |        |        | -0.260 | -0.466 |
| 0.612              | 1.43E-02       |          |        |        |        | 0.211  |
| ENSRNOG00000017608 | C2cd3          | 0.108    | 0.399  | 0.542  | -0.437 | -0.527 |
| 1.43E-02           |                |          |        |        |        |        |
| ENSRNOG00000002044 | Gtpbp8         | -0.084   |        |        | -0.371 | -0.615 |
| 0.348              | 0.403          | 1.43E-02 |        |        |        |        |
| ENSRNOG00000015529 | Cdca3          | 0.297    | 0.677  | 1.621  | -1.536 | -1.913 |
| 1.43E-02           |                |          |        |        |        |        |
| ENSRNOG00000019219 | Vamp1          | -0.025   |        |        | -0.163 | -0.668 |
| 0.427              | 1.44E-02       |          |        |        |        | 0.113  |
| ENSRNOG00000003895 | Rgs1           | 1.632    | 1.275  | 1.952  | -1.220 | -2.050 |
| 1.44E-02           |                |          |        |        |        |        |
| ENSRNOG00000017780 | Akr7a2         | -0.258   |        |        | -0.106 | -0.462 |
| 0.147              | 0.523          | 1.44E-02 |        |        |        |        |
| ENSRNOG00000024577 | Gamt           | -0.130   |        |        | -0.174 | -0.732 |
| 0.617              | 1.44E-02       |          |        |        |        | 0.242  |
| ENSRNOG00000008637 | Strada         | -0.014   |        |        | 0.172  | 0.368  |
| 0.316              | 1.44E-02       |          |        |        |        | -0.137 |
| ENSRNOG00000043219 | Fbn2           | -0.424   |        |        | 0.015  | 1.251  |
| 1.44E-02           |                |          |        |        |        | -0.597 |
| ENSRNOG00000014786 | Ccne1          | -0.185   |        |        | 0.124  | 1.444  |
| 1.44E-02           |                |          |        |        |        | -1.350 |
| ENSRNOG00000009197 | Asb4           | 0.225    | -0.559 |        | -1.590 | 0.309  |
| 1.45E-02           |                |          |        |        |        | 0.953  |
| ENSRNOG00000050348 | LOC684270      | -0.023   |        |        | -0.319 | -0.535 |
| 0.244              | 0.424          | 1.45E-02 |        |        |        |        |
| ENSRNOG00000031211 | Acsm5          | 0.696    | 0.255  | -0.775 |        | 0.363  |
|                    |                |          |        |        |        | 1.355  |
| ENSRNOG00000005587 | Suclg1         | -0.136   |        |        | -0.318 | -0.661 |
| 0.255              | 0.480          | 1.45E-02 |        |        |        |        |
| ENSRNOG00000005101 | Ctage5         | 0.247    | -0.477 |        | -0.710 | 0.223  |
| 0.395              | 1.45E-02       |          |        |        |        |        |
| ENSRNOG00000007300 | Clqtnf6        | 0.339    | 0.042  | 0.800  | -0.448 | -1.035 |
| 1.45E-02           |                |          |        |        |        |        |
| ENSRNOG00000018145 | Crat           | -0.074   |        |        | -0.171 | -0.461 |
| 0.442              | 1.45E-02       |          |        |        |        | 0.120  |
| ENSRNOG00000059837 | Cdkn2a         | 0.490    | 2.203  | 3.623  | -1.313 | -2.577 |
| 1.45E-02           |                |          |        |        |        |        |
| ENSRNOG00000032703 | Rasgrp3        | 0.554    | -0.293 |        | -1.014 | 0.269  |
| 0.788              | 1.45E-02       |          |        |        |        |        |

|                                             |           |        |        |        |        |        |
|---------------------------------------------|-----------|--------|--------|--------|--------|--------|
| ENSRNOG00000000033<br>1.45E-02              | Tmcc2     | 0.243  | -0.348 | -1.108 | 0.307  | 0.643  |
| ENSRNOG00000012763<br>0.334 1.45E-02        | Cwf1911   | 0.165  | -0.228 | -0.480 | 0.201  |        |
| ENSRNOG00000020567<br>1.45E-02              | Fibp      | 0.179  | 0.179  | 0.231  | -0.176 | -0.360 |
| ENSRNOG00000018716<br>1.45E-02              | Dennd2c   | 0.012  | 0.478  | 0.856  | -0.628 | -0.863 |
| ENSRNOG00000001915<br>1.45E-02              | Chod1     | 0.266  | -0.213 | 0.746  | -0.223 | -1.177 |
| ENSRNOG000000031801<br>1.45E-02             | Ephb3     | 0.041  | 0.801  | 1.732  | -0.404 | -1.236 |
| ENSRNOG000000057221<br>1.45E-02             | Scn3b     | -0.691 | 0.658  | 1.615  | -0.841 | -1.464 |
| ENSRNOG000000021713<br>1.45E-02             | Kif18b    | 0.036  | 1.405  | 2.132  | -1.591 | -2.331 |
| ENSRNOG000000014277<br>0.692 1.45E-02       | Zdhhc13   | -0.129 | 0.250  | 0.770  | -0.616 | -      |
| ENSRNOG000000008209<br>0.731 1.46E-02       | St3gal1   | 0.318  | -0.259 | -0.966 | 0.283  |        |
| ENSRNOG000000047499<br>0.478 1.47E-02       | Rbm15     | -0.009 | -0.137 | -0.470 | 0.158  |        |
| ENSRNOG000000000439<br>0.646 1.47E-02       | Ager      | -0.314 | -0.225 | -0.429 | 0.503  |        |
| ENSRNOG000000000913<br>1.47E-02             | Gusb      | 0.065  | 0.301  | 0.625  | -0.207 | -0.407 |
| ENSRNOG000000042944<br>1.47E-02             | Cenpw     | 0.098  | 0.082  | 1.941  | -0.860 | -2.421 |
| ENSRNOG000000019223<br>0.255 0.543 1.47E-02 | Atp5c1    | -0.162 | -0.343 | -0.728 |        |        |
| ENSRNOG000000006419<br>1.47E-02             | Aven      | 0.313  | -0.315 | -0.715 | 0.316  | 0.500  |
| ENSRNOG000000021086<br>1.47E-02             | Dtx4      | 0.118  | 0.224  | 0.438  | -0.352 | -0.575 |
| ENSRNOG000000010890<br>1.47E-02             | Bmp1      | -0.110 | 0.155  | 0.594  | -0.293 | -0.618 |
| ENSRNOG000000008806<br>0.408 1.48E-02       | Clip4     | -0.068 | -0.137 | -0.510 | 0.065  |        |
| ENSRNOG000000016935<br>0.441 1.48E-02       | Mapk1ip1  | 0.077  | -0.147 | -0.492 | 0.181  |        |
| ENSRNOG000000016574<br>0.314 1.48E-02       | Fiz1      | -0.009 | -0.101 | -0.401 | 0.053  |        |
| ENSRNOG000000049223<br>0.418 1.48E-02       | Vipas39   | -0.193 | 0.181  | 0.495  | -0.310 | -      |
| ENSRNOG000000052445<br>0.711 1.48E-02       | Kdm7a     | -0.018 | -0.314 | -0.839 | 0.093  |        |
| ENSRNOG000000013585<br>0.446 0.688 1.48E-02 | Nmnat3    | -0.148 | -0.302 | -0.699 |        |        |
| ENSRNOG000000016952<br>0.301 0.567 1.48E-02 | LOC686442 | -0.087 | -0.257 | -0.653 |        |        |
| ENSRNOG000000015161<br>0.246 0.506 1.48E-02 | LOC688754 | -0.104 | -0.285 | -0.640 |        |        |
| ENSRNOG000000014422<br>1.48E-02             | Gtf2e2    | 0.077  | 0.127  | 0.445  | -0.113 | -0.414 |

|                     |          |          |          |        |        |        |
|---------------------|----------|----------|----------|--------|--------|--------|
| ENSRNOG00000019667  | Ppfibp2  | -0.415   | 0.772    | 1.151  | -0.565 | -      |
| 0.690               |          | 1.48E-02 |          |        |        |        |
| ENSRNOG00000010947  | Mmp14    | 0.025    | 0.366    | 1.267  | -0.288 | -0.922 |
| 1.48E-02            |          |          |          |        |        |        |
| ENSRNOG00000007078  | Wispl    | 0.439    | -0.052   | 1.521  | -0.657 | -1.447 |
| 1.48E-02            |          |          |          |        |        |        |
| ENSRNOG00000008586  | Aldh1l2  | 1.077    | 0.740    | 1.072  | -1.593 | -1.647 |
| 1.48E-02            |          |          |          |        |        |        |
| ENSRNOG000000030102 | Mboat4   | 0.659    | 1.455    | 2.097  | -1.709 | -2.579 |
| 1.48E-02            |          |          |          |        |        |        |
| ENSRNOG000000039744 | RT1-CE4  | -0.062   | 0.811    | 1.165  | -0.246 | -      |
| 0.645               |          | 1.48E-02 |          |        |        |        |
| ENSRNOG000000003590 | Tom1l2   | -0.273   | -0.219   | -0.702 |        |        |
| 0.091               |          | 0.570    | 1.48E-02 |        |        |        |
| ENSRNOG000000002238 | Sema5b   | -0.136   | -0.188   | -0.393 |        |        |
| 0.315               |          | 0.822    | 1.49E-02 |        |        |        |
| ENSRNOG000000006206 | Tmem106b | -0.369   | -0.396   | -0.483 |        |        |
| 0.253               |          | 0.621    | 1.49E-02 |        |        |        |
| ENSRNOG000000000700 | Tmem119  | 0.337    | 0.779    | 2.131  | -1.029 | -1.732 |
| 1.49E-02            |          |          |          |        |        |        |
| ENSRNOG000000011702 | Foxp3    | 0.398    | -0.690   | -2.136 | 0.706  | 1.418  |
| 1.49E-02            |          |          |          |        |        |        |
| ENSRNOG000000016244 | Mical2   | 0.040    | 0.288    | -1.028 | 0.092  | 1.214  |
| 1.49E-02            |          |          |          |        |        |        |
| ENSRNOG000000024410 | Blvrb    | -0.272   | 0.498    | 1.002  | -0.319 | -0.509 |
| 1.49E-02            |          |          |          |        |        |        |
| ENSRNOG000000038622 | Zfp628   | -0.105   | -0.141   | -0.609 |        |        |
| 0.148               |          | 0.489    | 1.50E-02 |        |        |        |
| ENSRNOG000000045816 | Gria1    | 0.909    | 0.246    | 1.257  | -1.408 | -2.304 |
| 1.50E-02            |          |          |          |        |        |        |
| ENSRNOG000000036742 | Uqcrc2   | -0.256   | -0.309   | -0.589 |        |        |
| 0.211               |          | 0.563    | 1.51E-02 |        |        |        |
| ENSRNOG000000060707 | Atg2a    | -0.047   | -0.105   | -0.604 | 0.124  |        |
| 0.449               |          | 1.51E-02 |          |        |        |        |
| ENSRNOG000000006858 | Pyurfl1  | -0.069   | -0.268   | -0.538 |        |        |
| 0.248               |          | 0.443    | 1.51E-02 |        |        |        |
| ENSRNOG000000002908 | Slc35a4  | -0.062   | -0.094   | -0.411 |        |        |
| 0.085               |          | 0.308    | 1.51E-02 |        |        |        |
| ENSRNOG000000012513 | Pdk3     | 0.142    | 0.145    | 0.888  | -0.186 | -0.729 |
| 1.51E-02            |          |          |          |        |        |        |
| ENSRNOG000000024178 | Cenpt    | 0.574    | 0.952    | 1.594  | -1.962 | -2.011 |
| 1.51E-02            |          |          |          |        |        |        |
| ENSRNOG000000002332 | Mospd1   | 0.178    | -0.232   | -0.679 | 0.059  |        |
| 0.460               |          | 1.52E-02 |          |        |        |        |
| ENSRNOG000000004612 | Ppp1cb   | 0.060    | -0.426   | -0.693 | 0.240  |        |
| 0.527               |          | 1.52E-02 |          |        |        |        |
| ENSRNOG000000004103 | Trappc6b | 0.228    | -0.295   | -0.569 | 0.247  |        |
| 0.364               |          | 1.53E-02 |          |        |        |        |
| ENSRNOG000000033608 | Cd276    | -0.055   | 0.210    | 0.764  | -0.323 | -0.611 |
| 1.53E-02            |          |          |          |        |        |        |
| ENSRNOG000000038406 | Tmem132b | 1.004    | 0.819    | -1.623 | 0.064  | 2.149  |
| 1.54E-02            |          |          |          |        |        |        |
| ENSRNOG000000007646 | Sipa1l1  | 0.064    | -0.096   | -0.527 | 0.158  |        |
| 0.479               |          | 1.55E-02 |          |        |        |        |

|                    |                |        |        |        |        |        |        |
|--------------------|----------------|--------|--------|--------|--------|--------|--------|
| ENSRNOG00000005016 | Tmed4          | 0.157  | -0.150 | -0.381 | 0.173  | 0.316  |        |
| 1.55E-02           |                |        |        |        |        |        |        |
| ENSRNOG00000019751 | Cyb5r2         |        | -0.240 | 0.593  | 0.921  | -0.624 | -      |
| 0.664              |                |        |        |        |        |        |        |
| 1.55E-02           |                |        |        |        |        |        |        |
| ENSRNOG00000029465 | Slc26a10       |        | -0.185 | -0.276 |        | -0.400 |        |
| 0.379              |                |        |        |        |        |        |        |
| 0.921              |                |        |        |        |        |        |        |
| 1.56E-02           |                |        |        |        |        |        |        |
| ENSRNOG00000010984 | Anxa11         |        | -0.237 | -0.041 |        | -0.117 |        |
| 0.129              |                |        |        |        |        |        |        |
| 0.282              |                |        |        |        |        |        |        |
| 1.57E-02           |                |        |        |        |        |        |        |
| ENSRNOG00000025808 | Aars2          | -0.107 |        | -0.305 |        | -0.829 | 0.235  |
| 0.551              |                |        |        |        |        |        |        |
| 1.57E-02           |                |        |        |        |        |        |        |
| ENSRNOG00000011849 | Ndufs1         |        | -0.316 | -0.307 |        | -0.726 |        |
| 0.197              |                |        |        |        |        |        |        |
| 0.660              |                |        |        |        |        |        |        |
| 1.57E-02           |                |        |        |        |        |        |        |
| ENSRNOG00000030700 | Mt-cox3        |        | -0.341 | -0.361 |        | -0.682 |        |
| 0.276              |                |        |        |        |        |        |        |
| 0.649              |                |        |        |        |        |        |        |
| 1.58E-02           |                |        |        |        |        |        |        |
| ENSRNOG00000032398 | RGD1562136     |        | -0.058 | -0.308 |        | -0.835 |        |
| 0.202              |                |        |        |        |        |        |        |
| 0.496              |                |        |        |        |        |        |        |
| 1.58E-02           |                |        |        |        |        |        |        |
| ENSRNOG00000011419 | Aldh6a1        |        | -0.177 | -0.094 |        | -0.369 |        |
| 0.059              |                |        |        |        |        |        |        |
| 0.478              |                |        |        |        |        |        |        |
| 1.58E-02           |                |        |        |        |        |        |        |
| ENSRNOG00000050197 | Pdia6          | 0.135  | -0.017 | 0.141  | -0.004 |        | -0.275 |
| 1.58E-02           |                |        |        |        |        |        |        |
| ENSRNOG00000017445 | Tubb2b         |        | -0.247 | 0.156  | 0.970  | -0.229 | -      |
| 0.753              |                |        |        |        |        |        |        |
| 1.58E-02           |                |        |        |        |        |        |        |
| ENSRNOG00000013720 | Aebp1          | 0.748  | 0.361  | 1.198  | -0.466 |        | -0.969 |
| 1.58E-02           |                |        |        |        |        |        |        |
| ENSRNOG00000052477 | Tbrg4          | -0.357 |        | -0.202 |        | -0.335 | 0.249  |
| 0.453              |                |        |        |        |        |        |        |
| 1.58E-02           |                |        |        |        |        |        |        |
| ENSRNOG00000049768 | Adcy9          | 0.034  | -0.165 | -0.905 |        | 0.051  | 0.672  |
| 1.58E-02           |                |        |        |        |        |        |        |
| ENSRNOG00000016201 | Mrps9          | -0.289 |        | -0.213 |        | -0.420 | 0.202  |
| 0.399              |                |        |        |        |        |        |        |
| 1.58E-02           |                |        |        |        |        |        |        |
| ENSRNOG00000012303 | Apobec2        |        | -0.435 | -0.330 |        | -0.525 |        |
| 0.333              |                |        |        |        |        |        |        |
| 0.700              |                |        |        |        |        |        |        |
| 1.59E-02           |                |        |        |        |        |        |        |
| ENSRNOG00000013603 | Dffa           | -0.194 |        | -0.383 |        | -0.834 | 0.205  |
| 0.715              |                |        |        |        |        |        |        |
| 1.60E-02           |                |        |        |        |        |        |        |
| ENSRNOG00000003873 | Cpd            | -0.148 |        | -0.242 |        | -0.657 | 0.244  |
| 0.608              |                |        |        |        |        |        |        |
| 1.60E-02           |                |        |        |        |        |        |        |
| ENSRNOG00000050044 | Ptp4a2         | 0.091  | -0.179 |        |        | -0.878 | 0.102  |
| 0.556              |                |        |        |        |        |        |        |
| 1.60E-02           |                |        |        |        |        |        |        |
| ENSRNOG00000000513 | Mapk14         | 0.006  | -0.109 |        |        | -0.537 | 0.198  |
| 0.465              |                |        |        |        |        |        |        |
| 1.60E-02           |                |        |        |        |        |        |        |
| ENSRNOG00000003139 | Smc1a          | -0.063 |        | 0.181  | 0.318  | -0.155 | -0.275 |
| 1.60E-02           |                |        |        |        |        |        |        |
| ENSRNOG00000037364 | AABR07003049.1 |        | 0.057  | 0.441  | 0.544  | -0.402 | -      |
| 0.499              |                |        |        |        |        |        |        |
| 1.61E-02           |                |        |        |        |        |        |        |
| ENSRNOG00000059061 | Uqcr10         |        | -0.075 | -0.317 |        | -0.644 |        |
| 0.356              |                |        |        |        |        |        |        |
| 0.542              |                |        |        |        |        |        |        |
| 1.61E-02           |                |        |        |        |        |        |        |
| ENSRNOG00000029799 | Tomm34         |        | -0.098 | 0.335  | 0.229  | -0.345 | -      |
| 0.378              |                |        |        |        |        |        |        |
| 1.61E-02           |                |        |        |        |        |        |        |
| ENSRNOG00000042869 | LOC100360002   |        | -0.080 |        |        | -0.365 | -0.674 |
| 0.249              |                |        |        |        |        |        |        |
| 0.576              |                |        |        |        |        |        |        |
| 1.62E-02           |                |        |        |        |        |        |        |
| ENSRNOG00000007590 | Eya1           | 0.249  | -0.214 |        |        | -1.067 | 0.137  |
| 1.62E-02           |                |        |        |        |        |        |        |
| ENSRNOG00000024186 | Eef1b2         | 0.153  | 0.062  | 0.463  | -0.089 |        | -0.459 |
| 1.62E-02           |                |        |        |        |        |        |        |

|                      |                |        |        |        |        |        |
|----------------------|----------------|--------|--------|--------|--------|--------|
| ENSRNOG00000012457   | Cycl           | -0.282 | -0.256 | -0.695 | 0.223  |        |
| 0.578 1.63E-02       |                |        |        |        |        |        |
| ENSRNOG00000057470   | Pla2g12a       | -0.742 | -0.348 | -0.568 |        |        |
| 0.402 1.034 1.63E-02 |                |        |        |        |        |        |
| ENSRNOG00000003143   | RGD1310166     | 0.000  | 1.808  | 3.205  | -1.313 | -2.618 |
| 1.64E-02             |                |        |        |        |        |        |
| ENSRNOG00000003984   | Apln           | -0.110 | 0.073  | 0.756  | -0.406 | -1.128 |
| 1.64E-02             |                |        |        |        |        |        |
| ENSRNOG00000015264   | Lrrc38         | 0.332  | -0.616 | -1.856 | 0.689  |        |
| 1.443 1.64E-02       |                |        |        |        |        |        |
| ENSRNOG00000019850   | Speg           | 0.107  | -0.096 | -0.808 | 0.135  | 0.613  |
| 1.64E-02             |                |        |        |        |        |        |
| ENSRNOG00000059461   | B4galt1        | -0.020 | 0.237  | 0.416  | -0.252 | -      |
| 0.349 1.64E-02       |                |        |        |        |        |        |
| ENSRNOG00000055471   | Ywhah          | 0.039  | 0.101  | 0.242  | -0.156 | -0.306 |
| 1.64E-02             |                |        |        |        |        |        |
| ENSRNOG00000034234   | Mt-co1         | -0.413 | -0.386 | -0.613 |        |        |
| 0.307 0.681 1.64E-02 |                |        |        |        |        |        |
| ENSRNOG00000007837   | Acot11         | -0.627 | -0.350 | -0.908 |        |        |
| 0.587 1.212 1.65E-02 |                |        |        |        |        |        |
| ENSRNOG00000056139   | AABR07016621.1 | 0.135  | -0.307 | -1.157 |        |        |
| 0.522 0.986 1.65E-02 |                |        |        |        |        |        |
| ENSRNOG00000000316   | Sobp           | 0.255  | -0.339 | -0.952 | 0.345  | 0.663  |
| 1.65E-02             |                |        |        |        |        |        |
| ENSRNOG00000014723   | Cbfa2t3        | -0.101 | -0.181 | -0.574 |        |        |
| 0.356 0.548 1.65E-02 |                |        |        |        |        |        |
| ENSRNOG00000009049   | Usp11          | -0.307 | 0.449  | 0.967  | -0.368 | -0.703 |
| 1.65E-02             |                |        |        |        |        |        |
| ENSRNOG00000023064   | Catsper2       | 0.056  | 0.339  | 0.651  | -0.653 | -0.642 |
| 1.65E-02             |                |        |        |        |        |        |
| ENSRNOG00000052574   | Lbr            | 0.074  | -0.056 | -0.260 | 0.065  | 0.294  |
| 1.65E-02             |                |        |        |        |        |        |
| ENSRNOG00000011161   | Slc2a12        | 0.168  | -0.263 | -0.939 | 0.210  |        |
| 0.588 1.65E-02       |                |        |        |        |        |        |
| ENSRNOG00000017156   | Ankle1         | 0.357  | 0.965  | 1.713  | -2.037 | -2.288 |
| 1.66E-02             |                |        |        |        |        |        |
| ENSRNOG00000019862   | Pinlyp         | 0.512  | 0.724  | 1.170  | -0.456 | -1.164 |
| 1.66E-02             |                |        |        |        |        |        |
| ENSRNOG00000021155   | Ctsk           | 0.145  | 0.238  | 1.092  | -0.373 | -0.908 |
| 1.67E-02             |                |        |        |        |        |        |
| ENSRNOG00000013727   | Ndc80          | 0.316  | 0.378  | 1.528  | -0.674 | -1.410 |
| 1.68E-02             |                |        |        |        |        |        |
| ENSRNOG00000029055   | Ttk            | 0.131  | 0.794  | 1.312  | -1.717 | -2.223 |
| 1.69E-02             |                |        |        |        |        |        |
| ENSRNOG00000036841   | Cbx5           | -0.033 | 0.087  | 0.293  | -0.162 | -0.359 |
| 1.69E-02             |                |        |        |        |        |        |
| ENSRNOG00000000895   | Rabgef1        | 0.301  | -0.260 | -0.985 | 0.179  |        |
| 0.610 1.69E-02       |                |        |        |        |        |        |
| ENSRNOG00000022980   | Sdhd           | -0.124 | -0.321 | -0.644 | 0.276  |        |
| 0.515 1.69E-02       |                |        |        |        |        |        |
| ENSRNOG00000037080   | Adamts17       | -0.187 | 0.708  | 1.833  | -1.865 | -      |
| 2.437 1.69E-02       |                |        |        |        |        |        |
| ENSRNOG00000022772   | Prickle1       | -0.026 | -0.199 | -0.344 |        |        |
| 0.293 0.454 1.70E-02 |                |        |        |        |        |        |

|                      |            |        |        |        |        |        |
|----------------------|------------|--------|--------|--------|--------|--------|
| ENSRNOG00000021602   | Zmynd10    | -0.181 | -0.170 | -0.701 |        |        |
| 0.350 0.623 1.70E-02 |            |        |        |        |        |        |
| ENSRNOG00000033389   | Susd2      | -0.127 | -0.178 | -0.364 | 0.332  |        |
| 0.600 1.71E-02       |            |        |        |        |        |        |
| ENSRNOG00000029570   | Fam222b    | 0.024  | -0.204 | -0.498 | 0.273  |        |
| 0.338 1.71E-02       |            |        |        |        |        |        |
| ENSRNOG00000016686   | Tmem167a   | 0.227  | 0.103  | 0.268  | -0.186 | -0.388 |
| 1.71E-02             |            |        |        |        |        |        |
| ENSRNOG00000008329   | Ndufb11    | -0.052 | -0.331 | -0.712 |        |        |
| 0.356 0.530 1.71E-02 |            |        |        |        |        |        |
| ENSRNOG00000016789   | Actr1b     | -0.011 | 0.056  | 0.315  | -0.105 | -      |
| 0.339 1.72E-02       |            |        |        |        |        |        |
| ENSRNOG00000014997   | Igf2r      | 0.125  | 0.210  | 0.398  | -0.279 | -0.466 |
| 1.72E-02             |            |        |        |        |        |        |
| ENSRNOG00000043381   | Cyth1      | -0.298 | -0.096 | -0.138 | 0.170  |        |
| 0.358 1.73E-02       |            |        |        |        |        |        |
| ENSRNOG00000000987   | Ptcd1      | -0.099 | -0.026 | -0.192 | 0.094  |        |
| 0.280 1.73E-02       |            |        |        |        |        |        |
| ENSRNOG00000008609   | Capn3      | 0.047  | -0.181 | -0.511 | 0.090  | 0.357  |
| 1.73E-02             |            |        |        |        |        |        |
| ENSRNOG00000015695   | Sult5a1    | 0.839  | 0.344  | 0.739  | -0.506 | -1.221 |
| 1.73E-02             |            |        |        |        |        |        |
| ENSRNOG00000011316   | Fam167a    | 0.083  | 0.793  | 1.765  | -0.532 | -1.453 |
| 1.73E-02             |            |        |        |        |        |        |
| ENSRNOG00000016356   | Got1       | -0.463 | -0.408 | -0.787 | 0.377  |        |
| 0.760 1.73E-02       |            |        |        |        |        |        |
| ENSRNOG000000061216  | Tubb5      | -0.109 | 0.340  | 0.842  | -0.287 | -0.521 |
| 1.73E-02             |            |        |        |        |        |        |
| ENSRNOG00000010881   | Trak2      | -0.142 | -0.291 | -0.754 | 0.107  |        |
| 0.529 1.73E-02       |            |        |        |        |        |        |
| ENSRNOG00000012390   | Npw        | -0.331 | 0.293  | 2.191  | -1.230 | -2.234 |
| 1.73E-02             |            |        |        |        |        |        |
| ENSRNOG00000002052   | Ccdc80     | 0.693  | 0.613  | 1.297  | -1.026 | -1.147 |
| 1.73E-02             |            |        |        |        |        |        |
| ENSRNOG00000031273   | RGD1559972 | 0.134  | 0.031  | 0.588  | -0.008 | -0.502 |
| 1.74E-02             |            |        |        |        |        |        |
| ENSRNOG00000043150   | Arfgap1    | 0.164  | -0.240 | -0.412 | 0.256  |        |
| 0.307 1.75E-02       |            |        |        |        |        |        |
| ENSRNOG00000014013   | Map4k4     | -0.097 | 0.271  | 0.555  | -0.335 | -      |
| 0.413 1.75E-02       |            |        |        |        |        |        |
| ENSRNOG00000000903   | As1        | -0.101 | 0.253  | 0.446  | -0.185 | -0.405 |
| 1.77E-02             |            |        |        |        |        |        |
| ENSRNOG00000030644   | Mt-nd1     | -0.395 | -0.330 | -0.706 |        |        |
| 0.331 0.738 1.77E-02 |            |        |        |        |        |        |
| ENSRNOG00000018815   | Plk1       | 0.358  | 0.975  | 1.276  | -1.111 | -1.627 |
| 1.77E-02             |            |        |        |        |        |        |
| ENSRNOG00000011782   | Got2       | -0.267 | -0.132 | -0.445 | 0.167  |        |
| 0.456 1.77E-02       |            |        |        |        |        |        |
| ENSRNOG00000021150   | Plcb3      | -0.201 | -0.036 | -0.161 | 0.194  |        |
| 0.328 1.77E-02       |            |        |        |        |        |        |
| ENSRNOG00000002207   | Guf1       | -0.036 | -0.463 | -0.702 | 0.226  |        |
| 0.442 1.77E-02       |            |        |        |        |        |        |
| ENSRNOG00000001149   | Pxn        | 0.054  | -0.033 | -0.387 | 0.107  | 0.329  |
| 1.77E-02             |            |        |        |        |        |        |

|                    |              |        |        |        |          |
|--------------------|--------------|--------|--------|--------|----------|
| ENSRNOG00000057676 | Polr2m       | 0.039  | -0.264 | -0.655 | 0.180    |
| 0.375              |              |        |        |        | 1.77E-02 |
| ENSRNOG00000024101 | Phkb         | 0.193  | -0.178 | -1.142 | 0.116    |
| 1.78E-02           |              |        |        |        | 0.720    |
| ENSRNOG00000009862 | Olfm1        | 0.101  | 0.410  | 0.967  | -0.240   |
| 1.79E-02           |              |        |        |        | -0.720   |
| ENSRNOG00000004629 | Fkbp3        | 0.018  | -0.350 | -0.536 | 0.286    |
| 1.79E-02           |              |        |        |        | 0.476    |
| ENSRNOG00000005865 | Ssfa2        | -0.146 | -0.137 | -0.171 | 0.181    |
| 0.344              |              |        |        |        | 1.79E-02 |
| ENSRNOG00000024580 | Mamstr       | 0.151  | 0.792  | 0.995  | -0.531   |
| 1.79E-02           |              |        |        |        | -0.808   |
| ENSRNOG00000010277 | Idh3a        | 0.003  | -0.313 | -0.933 | 0.180    |
| 1.80E-02           |              |        |        |        | 0.570    |
| ENSRNOG00000049020 | Tceal3       | 0.973  | 1.250  | 2.015  | -1.325   |
| 1.80E-02           |              |        |        |        | -2.401   |
| ENSRNOG00000022500 | Rwdd4        | -0.060 | -0.233 | -0.415 | 0.142    |
| 0.290              |              |        |        |        | 1.81E-02 |
| ENSRNOG00000015295 | Ctdsp1       | 0.124  | -0.109 | -0.320 | 0.232    |
| 0.283              |              |        |        |        | 1.81E-02 |
| ENSRNOG00000014658 | Zfp423       | 0.118  | -0.020 | -0.631 | 0.101    |
| 0.536              |              |        |        |        | 1.81E-02 |
| ENSRNOG00000014530 | Nav2         | -0.341 | 0.359  | 0.714  | -0.239   |
| 1.81E-02           |              |        |        |        | -0.635   |
| ENSRNOG00000020075 | Eef1g        | 0.208  | 0.053  | 0.187  | -0.144   |
| 1.81E-02           |              |        |        |        | -0.365   |
| ENSRNOG00000017029 | Snx1         | -0.024 | 0.118  | 0.423  | -0.172   |
| 1.81E-02           |              |        |        |        | -0.376   |
| ENSRNOG00000050655 | P4ha1        | 0.196  | -0.369 | -0.695 | 0.306    |
| 1.82E-02           |              |        |        |        | 0.433    |
| ENSRNOG00000051854 | Enpep        | 0.046  | -0.316 | -0.448 | 0.163    |
| 1.82E-02           |              |        |        |        | 0.585    |
| ENSRNOG00000032293 | Polg         | -0.043 | -0.126 | -0.400 | 0.183    |
| 0.373              |              |        |        |        | 1.83E-02 |
| ENSRNOG00000014691 | Ric3         | 0.417  | 0.589  | -0.216 | 0.025    |
|                    |              |        |        |        | 0.766    |
|                    |              |        |        |        | 1.83E-02 |
| ENSRNOG00000017941 | Optn         | 0.056  | -0.030 | -0.457 | -0.041   |
| 0.315              |              |        |        |        | 1.83E-02 |
| ENSRNOG00000020723 | Pten         | 0.018  | 0.239  | 0.623  | -0.245   |
| 1.83E-02           |              |        |        |        | -0.464   |
| ENSRNOG00000006142 | Tmem8c       | -0.628 | 2.601  | 3.452  | -2.567   |
| 2.518              |              |        |        |        | 1.84E-02 |
| ENSRNOG00000023683 | Nog          | 0.316  | 0.047  | -0.724 | 0.287    |
|                    |              |        |        |        | 1.033    |
|                    |              |        |        |        | 1.84E-02 |
| ENSRNOG00000061299 | AC113925.2   | -0.741 | -0.619 | -1.062 |          |
| 0.616              |              |        |        |        | 1.84E-02 |
| ENSRNOG00000029996 | LOC100360150 | -0.004 | 0.213  | 1.374  | -0.364   |
| -0.798             |              |        |        |        | 1.84E-02 |
| ENSRNOG00000018117 | Ndufv1       | -0.331 | -0.213 | -0.653 |          |
| 0.213              |              |        |        |        | 1.84E-02 |
| ENSRNOG00000012258 | Rras2        | -0.108 | 0.221  | 0.701  | -0.396   |
| 1.84E-02           |              |        |        |        | -0.680   |
| ENSRNOG00000013463 | Kcnj8        | -0.399 | -0.302 | -0.502 | 0.429    |
| 0.760              |              |        |        |        | 1.84E-02 |



|                    |                |          |        |        |        |
|--------------------|----------------|----------|--------|--------|--------|
| ENSRNOG00000057759 | AABR07027854.1 | -0.035   | 0.080  | 0.469  | -0.073 |
| -0.385             | 1.84E-02       |          |        |        |        |
| ENSRNOG00000051816 | LOC502894      | 0.162    | -0.291 | -0.833 | 0.102  |
| 0.421              | 1.85E-02       |          |        |        |        |
| ENSRNOG00000007895 | Pdhb           | -0.303   | -0.277 | -0.615 | 0.201  |
| 0.504              | 1.85E-02       |          |        |        |        |
| ENSRNOG00000023337 | Sema3a         | 0.811    | 1.150  | 2.506  | -1.225 |
| 1.85E-02           |                |          |        |        |        |
| ENSRNOG00000029910 | Golga4         | -0.128   | -0.118 | -0.412 |        |
| 0.157              | 0.411          | 1.85E-02 |        |        |        |
| ENSRNOG00000012495 | Podxl          | -0.104   | -0.290 | -0.526 | 0.203  |
| 0.576              | 1.85E-02       |          |        |        |        |
| ENSRNOG00000009930 | Pigo           | -0.033   | -0.214 | -0.656 | 0.101  |
| 0.488              | 1.85E-02       |          |        |        |        |
| ENSRNOG00000010673 | Eral1          | -0.051   | -0.163 | -0.467 | 0.161  |
| 0.318              | 1.86E-02       |          |        |        |        |
| ENSRNOG00000009314 | Ivl            | 0.026    | -0.015 | 2.411  | 0.027  |
| 1.86E-02           |                |          |        |        |        |
| ENSRNOG00000007378 | Acox2          | -0.497   | -0.303 | -1.219 | 0.453  |
| 1.315              | 1.87E-02       |          |        |        |        |
| ENSRNOG00000015540 | Ppp6r3         | -0.034   | -0.110 | -0.377 |        |
| 0.048              | 0.272          | 1.87E-02 |        |        |        |
| ENSRNOG00000015794 | Fam83d         | 0.449    | 0.801  | 2.393  | -0.943 |
| 1.87E-02           |                |          |        |        |        |
| ENSRNOG00000019295 | Rab12          | 0.090    | 0.153  | 0.369  | -0.187 |
| 1.87E-02           |                |          |        |        |        |
| ENSRNOG00000016161 | Lman2          | 0.068    | -0.240 | -0.693 | 0.275  |
| 1.87E-02           |                |          |        |        |        |
| ENSRNOG00000015033 | Mxd4           | -0.002   | 0.203  | 0.473  | -0.080 |
| 1.87E-02           |                |          |        |        |        |
| ENSRNOG00000022730 | Zfp57          | -0.023   | 0.186  | 1.995  | -0.696 |
| 1.87E-02           |                |          |        |        |        |
| ENSRNOG00000019022 | Fam89a         | -0.227   | -0.330 | -0.479 |        |
| 0.577              | 0.813          | 1.88E-02 |        |        |        |
| ENSRNOG00000009298 | Fbxo44         | -0.212   | -0.291 | -0.739 |        |
| 0.348              | 0.764          | 1.88E-02 |        |        |        |
| ENSRNOG00000029971 | Mt-nd5         | -0.373   | -0.310 | -0.721 |        |
| 0.184              | 0.731          | 1.88E-02 |        |        |        |
| ENSRNOG00000012873 | Gfm1           | -0.159   | -0.250 | -0.596 | 0.120  |
| 0.397              | 1.88E-02       |          |        |        |        |
| ENSRNOG00000016917 | Clcn1          | 0.166    | -0.194 | -1.067 | 0.193  |
| 1.88E-02           |                |          |        |        |        |
| ENSRNOG00000014480 | Sys1           | 0.202    | -0.254 | -0.730 | 0.384  |
| 1.88E-02           |                |          |        |        |        |
| ENSRNOG00000031485 | Dpp3           | -0.020   | 0.279  | 0.398  | -0.389 |
| 1.89E-02           |                |          |        |        |        |
| ENSRNOG00000013179 | Tinagl1        | -0.110   | -0.346 | -0.534 |        |
| 0.428              | 0.767          | 1.89E-02 |        |        |        |
| ENSRNOG00000012494 | Kctd14         | 0.288    | 0.156  | 0.765  | -0.208 |
| 1.89E-02           |                |          |        |        |        |
| ENSRNOG00000016678 | Angptl2        | 0.166    | 0.137  | 0.369  | -0.223 |
| 1.89E-02           |                |          |        |        |        |
| ENSRNOG00000012434 | Zfp598         | 0.113    | -0.100 | -0.400 | 0.131  |
| 0.332              | 1.90E-02       |          |        |        |        |

|                    |            |          |        |        |        |        |
|--------------------|------------|----------|--------|--------|--------|--------|
| ENSRNOG00000014214 | Rpl27a     | 0.100    | 0.079  | 0.485  | -0.053 | -0.458 |
| 1.90E-02           |            |          |        |        |        |        |
| ENSRNOG00000008837 | Ass1       | -0.274   |        | -0.330 | -0.665 | 0.706  |
| 0.968              | 1.91E-02   |          |        |        |        |        |
| ENSRNOG00000001707 | Vwa5b2     | -0.208   |        | -0.227 | -0.464 |        |
| 0.219              | 0.608      | 1.92E-02 |        |        |        |        |
| ENSRNOG00000019485 | Bckdk      | -0.070   |        | -0.172 | -0.456 | 0.192  |
| 0.339              | 1.92E-02   |          |        |        |        |        |
| ENSRNOG00000023278 | Sec61a2    | 0.091    | 0.196  | 0.204  | -0.133 | -0.356 |
| 1.92E-02           |            |          |        |        |        |        |
| ENSRNOG00000018276 | Mgat4a     | 0.007    | -0.055 |        | -0.102 | 0.259  |
| 0.495              | 1.92E-02   |          |        |        |        |        |
| ENSRNOG00000013837 | Tp53bp1    | -0.238   |        | 0.153  | 0.399  | -0.441 |
| 0.519              | 1.92E-02   |          |        |        |        | -      |
| ENSRNOG00000027087 | Tmem186    | -0.064   |        | -0.109 | -0.341 |        |
| 0.075              | 0.277      | 1.93E-02 |        |        |        |        |
| ENSRNOG00000017342 | Zdhhc7     | -0.026   |        | -0.045 | -0.320 |        |
| 0.205              | 0.270      | 1.93E-02 |        |        |        |        |
| ENSRNOG00000002517 | Pdc        | -0.280   |        | -0.640 | -2.379 | 0.878  |
| 1.990              | 1.93E-02   |          |        |        |        |        |
| ENSRNOG00000038300 | Gstt4      | 0.605    | 2.278  | 3.066  | -1.224 | -2.529 |
| 1.94E-02           |            |          |        |        |        |        |
| ENSRNOG00000047306 | Stap2      | -0.041   |        | 1.021  | 1.810  | -0.934 |
| 1.95E-02           |            |          |        |        |        | -1.162 |
| ENSRNOG00000003625 | Ubxn4      | -0.077   |        | 0.190  | 0.465  | -0.258 |
| 1.95E-02           |            |          |        |        |        | -0.383 |
| ENSRNOG00000026941 | Tril       | -0.175   |        | 0.011  | 0.464  | -0.168 |
| 1.95E-02           |            |          |        |        |        | -0.548 |
| ENSRNOG00000045604 | AC139391.1 | 0.185    | -0.598 |        | -1.919 | 0.423  |
| 1.434              | 1.95E-02   |          |        |        |        |        |
| ENSRNOG00000008051 | Itpk1      | -0.209   |        | 0.014  | -0.300 | 0.255  |
| 1.95E-02           |            |          |        |        |        | 0.518  |
| ENSRNOG00000017545 | Mrs2       | -0.180   |        | -0.235 | -0.599 | 0.129  |
| 0.440              | 1.95E-02   |          |        |        |        |        |
| ENSRNOG00000012827 | Mlf1       | 0.397    | -0.653 |        | -1.318 | 0.437  |
| 1.96E-02           |            |          |        |        |        | 0.740  |
| ENSRNOG00000056894 | St6galnac3 | -0.321   |        | -0.237 | -0.606 |        |
| 0.368              | 0.691      | 1.96E-02 |        |        |        |        |
| ENSRNOG00000003653 | Fh         | -0.249   |        | -0.414 | -0.732 | 0.190  |
| 0.529              | 1.96E-02   |          |        |        |        |        |
| ENSRNOG00000015928 | Dhx35      | -0.217   |        | -0.223 | -0.676 | 0.230  |
| 0.462              | 1.96E-02   |          |        |        |        |        |
| ENSRNOG00000022249 | Ml1t10     | 0.000    | -0.071 |        | -0.358 | 0.056  |
| 0.334              | 1.96E-02   |          |        |        |        |        |
| ENSRNOG00000028674 | Fbxw5      | -0.161   |        | -0.162 | -0.485 | 0.124  |
| 0.332              | 1.96E-02   |          |        |        |        |        |
| ENSRNOG00000026527 | Snx32      | 0.099    | 0.602  | 0.765  | -0.466 | -0.653 |
| 1.97E-02           |            |          |        |        |        |        |
| ENSRNOG00000058478 | Mapk8ip1   | 0.237    | -0.272 |        | -0.659 | 0.386  |
| 0.537              | 1.97E-02   |          |        |        |        |        |
| ENSRNOG00000002763 | Ulk2       | -0.015   |        | -0.166 | -0.460 | 0.061  |
| 0.359              | 1.97E-02   |          |        |        |        |        |
| ENSRNOG00000001681 | Dscr3      | -0.012   |        | 0.232  | 0.503  | -0.217 |
| 1.97E-02           |            |          |        |        |        | -0.413 |

|                      |            |              |              |             |        |  |
|----------------------|------------|--------------|--------------|-------------|--------|--|
| ENSRNOG00000022490   | AC115341.1 | -0.092       | -0.344       | -0.668      |        |  |
| 0.236 0.541 1.98E-02 |            |              |              |             |        |  |
| ENSRNOG00000018371   | Tubb6      | -0.294       | 1.589 2.392  | -1.285      | -1.271 |  |
| 1.98E-02             |            |              |              |             |        |  |
| ENSRNOG00000016740   | Fam210a    | -0.367       | -0.327       | -0.692      |        |  |
| 0.154 0.557 1.99E-02 |            |              |              |             |        |  |
| ENSRNOG00000015456   | Zfp787     | -0.102       | -0.170       | -0.550      |        |  |
| 0.122 0.405 1.99E-02 |            |              |              |             |        |  |
| ENSRNOG00000002713   | Zfp672     | -0.039       | -0.165       | -0.380      |        |  |
| 0.162 0.311 1.99E-02 |            |              |              |             |        |  |
| ENSRNOG00000026049   | Qrs11      | -0.110       | -0.310       | -0.761      | 0.223  |  |
| 0.519 2.00E-02       |            |              |              |             |        |  |
| ENSRNOG00000014785   | Ykt6       | 0.051 0.069  | 0.240 -0.201 | -0.226      |        |  |
| 2.00E-02             |            |              |              |             |        |  |
| ENSRNOG00000005496   | Ing3       | 0.162 0.053  | 0.113 -0.307 | -0.346      |        |  |
| 2.00E-02             |            |              |              |             |        |  |
| ENSRNOG00000010331   | Ctsb       | 0.000 0.202  | 0.705 -0.105 | -0.387      |        |  |
| 2.00E-02             |            |              |              |             |        |  |
| ENSRNOG000000053502  | Arhgef17   | 0.169 0.229  | 0.323 -0.091 | -0.396      |        |  |
| 2.00E-02             |            |              |              |             |        |  |
| ENSRNOG000000034246  | Rps27a-ps1 | 0.168 0.034  | 0.462 -0.127 | -0.469      |        |  |
| 2.00E-02             |            |              |              |             |        |  |
| ENSRNOG00000020440   | Fads2      | -0.061       | -0.039       | 0.444 0.023 | -0.598 |  |
| 2.00E-02             |            |              |              |             |        |  |
| ENSRNOG00000020688   | Ccdc51     | -0.308       | -0.232       | -0.571      |        |  |
| 0.343 0.482 2.00E-02 |            |              |              |             |        |  |
| ENSRNOG000000060934  | Ptx4       | 0.526 -0.073 | 1.716 -0.931 | -2.858      |        |  |
| 2.00E-02             |            |              |              |             |        |  |
| ENSRNOG000000054896  | Pex13      | -0.007       | -0.169       | -0.535      | 0.206  |  |
| 0.397 2.01E-02       |            |              |              |             |        |  |
| ENSRNOG00000018604   | Tufm       | -0.204       | -0.173       | -0.476      | 0.209  |  |
| 0.443 2.01E-02       |            |              |              |             |        |  |
| ENSRNOG000000043094  | Oxct1      | -0.374       | -0.571       | -0.985      | 0.398  |  |
| 0.942 2.01E-02       |            |              |              |             |        |  |
| ENSRNOG000000004107  | Rpl23      | 0.128 0.059  | 0.424 -0.081 | -0.397      |        |  |
| 2.02E-02             |            |              |              |             |        |  |
| ENSRNOG000000056325  | Mocs2      | 0.143 -0.383 | -0.782       | 0.224 0.516 |        |  |
| 2.02E-02             |            |              |              |             |        |  |
| ENSRNOG000000056714  | Sla        | 0.130 0.357  | 0.889 -0.358 | -0.712      |        |  |
| 2.03E-02             |            |              |              |             |        |  |
| ENSRNOG000000021005  | Mrpl16     | -0.049       | -0.332       | -0.531      |        |  |
| 0.284 0.487 2.04E-02 |            |              |              |             |        |  |
| ENSRNOG000000000281  | Prodh      | -0.140       | -0.622       | -0.936      | 0.421  |  |
| 1.028 2.04E-02       |            |              |              |             |        |  |
| ENSRNOG00000012944   | Casp9      | -0.193       | 0.170 0.430  | -0.309      | -0.415 |  |
| 2.04E-02             |            |              |              |             |        |  |
| ENSRNOG00000013934   | St5        | -0.332       | 0.303 0.656  | -0.376      | -0.493 |  |
| 2.04E-02             |            |              |              |             |        |  |
| ENSRNOG000000023485  | Ushbp1     | -0.207       | -0.223       | -0.303      |        |  |
| 0.224 0.521 2.04E-02 |            |              |              |             |        |  |
| ENSRNOG00000012645   | Mecom      | -0.209       | -0.141       | -0.283      | 0.195  |  |
| 0.477 2.05E-02       |            |              |              |             |        |  |
| ENSRNOG00000015495   | Slc25a37   | -0.174       | 0.348 0.759  | -0.580      | -      |  |
| 0.638 2.05E-02       |            |              |              |             |        |  |

|                    |                |          |        |        |        |        |
|--------------------|----------------|----------|--------|--------|--------|--------|
| ENSRNOG00000009785 | Cdkn3          | 0.523    | 1.040  | 1.828  | -1.125 | -1.849 |
| 2.07E-02           |                |          |        |        |        |        |
| ENSRNOG00000059878 | Rad51ap1       | 0.124    | 0.193  | 0.479  | -0.307 | -0.717 |
| 2.08E-02           |                |          |        |        |        |        |
| ENSRNOG00000026842 | Nnt            | -0.604   | -0.227 | -0.496 | 0.207  |        |
| 0.735              | 2.08E-02       |          |        |        |        |        |
| ENSRNOG00000027900 | Glt6d1         | 0.881    | 0.299  | 0.844  | -0.982 | -1.695 |
| 2.08E-02           |                |          |        |        |        |        |
| ENSRNOG00000009719 | C2cd21         | -0.012   | -0.176 | -0.401 |        |        |
| 0.186              | 0.390          | 2.08E-02 |        |        |        |        |
| ENSRNOG00000007859 | Cep83          | 0.048    | -0.339 | -0.351 | 0.192  | 0.289  |
| 2.08E-02           |                |          |        |        |        |        |
| ENSRNOG00000001044 | Aimp2          | 0.020    | -0.240 | -0.622 | 0.219  | 0.347  |
| 2.08E-02           |                |          |        |        |        |        |
| ENSRNOG00000014522 | Mlycd          | -0.378   | -0.278 | -0.189 | 0.173  |        |
| 0.608              | 2.09E-02       |          |        |        |        |        |
| ENSRNOG00000046330 | Rnf130         | 0.201    | -0.146 | -0.328 | 0.227  |        |
| 0.284              | 2.09E-02       |          |        |        |        |        |
| ENSRNOG00000042592 | Rgs10          | 0.015    | 0.233  | 0.959  | -0.056 | -0.545 |
| 2.09E-02           |                |          |        |        |        |        |
| ENSRNOG00000029449 | Ror1           | 0.021    | -0.168 | 0.480  | -0.327 | -0.622 |
| 2.09E-02           |                |          |        |        |        |        |
| ENSRNOG00000016405 | Pcsk4          | -0.259   | -0.062 | -0.543 | 0.116  |        |
| 0.749              | 2.09E-02       |          |        |        |        |        |
| ENSRNOG00000014963 | Adgrg1         | -0.125   | -0.307 | -0.501 |        |        |
| 0.241              | 0.621          | 2.09E-02 |        |        |        |        |
| ENSRNOG00000012393 | Sl00a13        | 0.072    | 0.270  | 0.485  | -0.394 | -0.506 |
| 2.09E-02           |                |          |        |        |        |        |
| ENSRNOG00000053026 | Shcbp1         | -0.247   | -0.176 | 1.318  | -0.374 |        |
| -1.831             | 2.10E-02       |          |        |        |        |        |
| ENSRNOG00000003897 | Colla1         | 0.919    | 0.257  | 0.946  | -0.912 | -1.304 |
| 2.11E-02           |                |          |        |        |        |        |
| ENSRNOG00000054017 | Hist1h4b       | 0.287    | 0.318  | 0.620  | -0.320 | -0.644 |
| 2.12E-02           |                |          |        |        |        |        |
| ENSRNOG00000002216 | Srd5a3         | 0.127    | 0.207  | 0.381  | -0.273 | -0.314 |
| 2.14E-02           |                |          |        |        |        |        |
| ENSRNOG00000054689 | Cox7b          | -0.157   | -0.360 | -0.640 | 0.294  |        |
| 0.597              | 2.14E-02       |          |        |        |        |        |
| ENSRNOG00000057153 | Pla1a          | 0.454    | 0.200  | 0.525  | -0.224 | -0.431 |
| 2.14E-02           |                |          |        |        |        |        |
| ENSRNOG00000019745 | Actn3          | 0.727    | -0.289 | -1.418 | 0.350  | 0.970  |
| 2.14E-02           |                |          |        |        |        |        |
| ENSRNOG00000010838 | Araf           | 0.089    | -0.167 | -0.329 | 0.121  | 0.281  |
| 2.15E-02           |                |          |        |        |        |        |
| ENSRNOG00000015150 | Spg7           | -0.244   | -0.073 | -0.415 | 0.061  |        |
| 0.363              | 2.15E-02       |          |        |        |        |        |
| ENSRNOG00000021292 | AABR07028027.1 | -0.014   | 0.087  | 0.394  | -0.079 |        |
| -0.267             | 2.15E-02       |          |        |        |        |        |
| ENSRNOG00000003594 | Tmem183a       | 0.080    | 0.073  | 0.326  | -0.152 | -0.352 |
| 2.15E-02           |                |          |        |        |        |        |
| ENSRNOG00000001385 | Plbd2          | 0.131    | 0.457  | 0.538  | -0.414 | -0.411 |
| 2.15E-02           |                |          |        |        |        |        |
| ENSRNOG00000020657 | Shc1           | -0.056   | 0.240  | 0.489  | -0.180 | -0.281 |
| 2.15E-02           |                |          |        |        |        |        |

|                                             |            |        |        |        |        |        |   |
|---------------------------------------------|------------|--------|--------|--------|--------|--------|---|
| ENSRNOG00000017621<br>2.16E-02              | Spns1      | 0.274  | -0.066 | -0.620 | 0.251  | 0.484  |   |
| ENSRNOG00000006868<br>2.16E-02              | Ube2z      | -0.080 | 0.109  | 0.380  | -0.157 | -0.276 |   |
| ENSRNOG00000006557<br>0.676 2.16E-02        | Cyfip2     | -0.039 | 0.233  | 0.835  | -0.320 |        | - |
| ENSRNOG00000004686<br>2.17E-02              | Spop       | 0.236  | -0.220 | -0.574 | 0.113  | 0.293  |   |
| ENSRNOG000000053285<br>0.485 2.18E-02       | Mltt6      | -0.105 | -0.105 | -0.399 | 0.204  |        |   |
| ENSRNOG00000010843<br>2.18E-02              | Nhlrc3     | 0.066  | 0.274  | 0.524  | -0.352 | -0.414 |   |
| ENSRNOG00000014742<br>0.470 2.18E-02        | Ankrd13b   | -0.175 | 0.024  | -0.423 | -0.049 |        |   |
| ENSRNOG00000019662<br>0.672 2.19E-02        | Tm6sf1     | -0.279 | 0.114  | 0.982  | -0.130 |        | - |
| ENSRNOG000000024879<br>0.389 2.19E-02       | Polrmt     | -0.012 | 0.014  | -0.371 | 0.077  |        |   |
| ENSRNOG000000054251<br>1.178 2.19E-02       | Clec7a     | -0.203 | 0.895  | 2.029  | -0.067 |        | - |
| ENSRNOG00000013505<br>0.357 2.19E-02        | Vdac2      | -0.005 | -0.166 | -0.460 | 0.182  |        |   |
| ENSRNOG00000018366<br>2.19E-02              | RGD1310819 | 0.198  | 2.137  | 3.033  | -1.888 | -2.693 |   |
| ENSRNOG000000046231<br>0.557 2.20E-02       | Cacna1s    | 0.424  | -0.305 | -1.005 | 0.238  |        |   |
| ENSRNOG00000017481<br>0.148 0.481 2.21E-02  | Sucla2     | -0.161 | -0.292 | -0.626 |        |        |   |
| ENSRNOG00000018502<br>2.21E-02              | Mon1a      | 0.043  | -0.059 | -0.377 | 0.131  | 0.374  |   |
| ENSRNOG000000048321<br>2.22E-02             | Tnfsf8     | 1.480  | 1.160  | 1.699  | -1.653 | -1.687 |   |
| ENSRNOG00000017577<br>0.650 2.22E-02        | Bph1       | -0.105 | -0.674 | -0.734 | 0.595  |        |   |
| ENSRNOG000000037238<br>0.107 0.464 2.22E-02 | Rnmtl1     | -0.341 | -0.121 | -0.377 |        |        |   |
| ENSRNOG00000015177<br>2.22E-02              | Sun2       | 0.085  | -0.015 | -0.388 | 0.182  | 0.362  |   |
| ENSRNOG00000017419<br>0.197 0.325 2.22E-02  | Map3k4     | -0.059 | -0.178 | -0.404 |        |        |   |
| ENSRNOG00000001834<br>2.22E-02              | Mzt2b      | 0.130  | -0.180 | -0.381 | 0.165  | 0.309  |   |
| ENSRNOG000000003890<br>2.22E-02             | Nap1l1     | 0.021  | 0.178  | 0.663  | -0.180 | -0.436 |   |
| ENSRNOG000000022953<br>0.961 2.22E-02       | Ccdc163    | -0.065 | 0.136  | 0.827  | -0.496 |        | - |
| ENSRNOG000000033815<br>2.22E-02             | AC142181.1 | 0.282  | 0.604  | 2.041  | -0.226 | -1.494 |   |
| ENSRNOG000000004706<br>1.242 2.22E-02       | Vit        | -0.044 | -0.743 | -0.693 | 0.967  |        |   |
| ENSRNOG000000027228<br>0.954 2.22E-02       | Mogat2     | 0.027  | -0.223 | -1.171 | 0.188  |        |   |
| ENSRNOG000000004078<br>2.22E-02             | Eno3       | 0.171  | -0.281 | -1.258 | 0.298  | 0.772  |   |

|                                            |              |        |        |        |        |        |                |
|--------------------------------------------|--------------|--------|--------|--------|--------|--------|----------------|
| ENSRNOG00000013048<br>2.22E-02             | Pde7a        | 0.061  | 1.015  | 1.260  | -0.540 | -0.863 |                |
| ENSRNOG00000006615<br>2.22E-02             | Mtap         | 0.143  | 0.009  | 0.238  | -0.056 | -0.363 |                |
| ENSRNOG00000013967<br>2.22E-02             | Blnk         | -0.491 |        | 0.570  | 1.746  | -0.351 | -1.180         |
| ENSRNOG00000002823<br>2.23E-02             | Mapk9        | 0.084  | -0.177 |        | -0.478 | 0.109  | 0.331          |
| ENSRNOG000000052289<br>0.263 2.24E-02      | Ptdss1       |        | 0.048  | -0.021 |        | 0.172  | -0.123 -       |
| ENSRNOG00000016891<br>2.24E-02             | Uimc1        | 0.096  | 0.145  | 0.354  | -0.107 | -0.341 |                |
| ENSRNOG00000014987<br>2.24E-02             | Mdfi         | 0.192  | 0.149  | 1.163  | -0.636 | -1.302 |                |
| ENSRNOG00000019306<br>2.26E-02             | Syt12        | -0.016 |        | 0.538  | 2.542  | -0.821 | -2.516         |
| ENSRNOG00000002459<br>0.445 2.26E-02       | Fbxo40       |        | 0.159  | 0.084  | -0.599 | -0.051 |                |
| ENSRNOG000000060141<br>0.490 2.27E-02      | Epdr1        | -0.467 |        | -0.327 |        | -0.592 | 0.215          |
| ENSRNOG00000008046<br>2.27E-02             | Tmem30b      |        | 0.417  | 0.079  | 1.507  | -0.888 | -2.275         |
| ENSRNOG00000016029<br>2.27E-02             | Rb1          | 0.116  | 0.260  | 0.531  | -0.344 | -0.497 |                |
| ENSRNOG00000045655<br>0.880 2.28E-02       | LOC100911774 |        |        | 0.200  | 0.426  | 0.726  | -0.403 -       |
| ENSRNOG00000009538<br>0.563 2.29E-02       | Etfdh        | -0.404 |        | -0.349 |        | -0.383 | 0.171          |
| ENSRNOG00000015142<br>0.198 0.463 2.29E-02 | Timm21       |        | -0.122 |        | -0.216 | -0.435 |                |
| ENSRNOG00000011158<br>0.060 0.232 2.29E-02 | Ppp2r2a      |        | -0.115 |        | -0.067 | -0.234 |                |
| ENSRNOG00000010011<br>0.949 2.29E-02       | Osbpl3       |        | -0.506 |        | 0.785  | 1.231  | -0.963 -       |
| ENSRNOG00000013437<br>0.529 1.275 2.30E-02 | LOC691083    |        | -0.011 |        | -0.616 | -1.764 |                |
| ENSRNOG00000021380<br>2.30E-02             | Fads6        | -0.103 |        | 0.101  | -0.432 | 0.126  | 0.544          |
| ENSRNOG00000010309<br>2.30E-02             | Nfyb         | 0.065  | -0.179 |        | -0.478 | 0.068  | 0.359          |
| ENSRNOG00000009112<br>2.30E-02             | Pon2         | -0.030 |        | 0.030  | 0.404  | -0.272 | -0.405         |
| ENSRNOG00000027730<br>0.597 2.31E-02       | Nxpe1        | -0.121 |        | -0.287 |        | -0.456 | 0.308          |
| ENSRNOG00000018400                         | Golm1        | 0.115  | 0.059  | -0.520 |        | 0.278  | 0.798 2.32E-02 |
| ENSRNOG00000002959<br>0.123 0.545 2.32E-02 | Shroom4      |        | -0.116 |        | -0.249 | -0.470 |                |
| ENSRNOG00000033639<br>0.351 2.32E-02       | Zfp777       |        | 0.061  | -0.110 |        | -0.535 | 0.184          |
| ENSRNOG00000024429<br>2.32E-02             | Peg12        | 0.755  | 0.483  | 1.199  | -0.987 | -1.430 |                |
| ENSRNOG00000057125<br>2.33E-02             | Ddr1         | -0.010 |        | 0.472  | 0.766  | -0.446 | -0.576         |

|                      |                |              |              |             |             |
|----------------------|----------------|--------------|--------------|-------------|-------------|
| ENSRNOG00000014383   | AABR07070456.1 | 0.095        | -0.280       | -1.090      |             |
| 0.511 0.883 2.33E-02 |                |              |              |             |             |
| ENSRNOG00000020060   | Atf5           | 0.063        | -0.082       | -0.329      | 0.186 0.560 |
| 2.33E-02             |                |              |              |             |             |
| ENSRNOG00000007230   | Kank3          | -0.230       | -0.270       | -0.357      | 0.395       |
| 0.557 2.33E-02       |                |              |              |             |             |
| ENSRNOG00000009222   | Epha2          | 0.031 0.071  | -0.204       | 0.120 0.525 | 2.33E-02    |
|                      |                |              |              |             |             |
| ENSRNOG00000048095   | RGD1564801     | 0.025 0.065  | 0.497 0.083  | -0.530      |             |
| 2.33E-02             |                |              |              |             |             |
| ENSRNOG00000016475   | Nt5c3b         | -0.170       | 0.189 0.579  | -0.162      | -           |
| 0.468 2.33E-02       |                |              |              |             |             |
| ENSRNOG00000010719   | Exosc10        | -0.075       | -0.028       | -0.169      |             |
| 0.093 0.240 2.33E-02 |                |              |              |             |             |
| ENSRNOG00000000451   | RT1-Ba         | 0.281 0.654  | 0.991 -0.671 | -0.849      |             |
| 2.33E-02             |                |              |              |             |             |
| ENSRNOG00000029178   | Abcc5          | -0.148       | -0.046       | -0.649      | 0.133       |
| 0.476 2.34E-02       |                |              |              |             |             |
| ENSRNOG00000015810   | Trip13         | 0.523 0.598  | 1.307 -1.081 | -1.720      |             |
| 2.34E-02             |                |              |              |             |             |
| ENSRNOG00000032885   | Cycs           | -0.053       | -0.452       | -0.917      | 0.230       |
| 0.602 2.34E-02       |                |              |              |             |             |
| ENSRNOG00000000893   | Tmem248        | 0.376 -0.250 | -0.763       | 0.246       |             |
| 0.462 2.36E-02       |                |              |              |             |             |
| ENSRNOG00000030416   | Zfp870         | 0.000 -0.225 | -0.674       | 0.187       |             |
| 0.465 2.36E-02       |                |              |              |             |             |
| ENSRNOG00000023086   | Arpp19         | -0.098       | 0.490 1.065  | -0.577      | -           |
| 0.861 2.37E-02       |                |              |              |             |             |
| ENSRNOG00000017826   | Mtrr           | 0.057 -0.108 | -0.286       | 0.040 0.252 |             |
| 2.38E-02             |                |              |              |             |             |
| ENSRNOG00000028753   | B9d2           | -0.098       | 0.332 0.654  | -0.265      | -0.447      |
| 2.38E-02             |                |              |              |             |             |
| ENSRNOG00000020995   | Fut1           | 0.125 0.479  | 0.587 -0.892 | -1.421      |             |
| 2.38E-02             |                |              |              |             |             |
| ENSRNOG00000017235   | Atp6v0d1       | 0.123 0.095  | 0.214 -0.070 | -0.218      |             |
| 2.38E-02             |                |              |              |             |             |
| ENSRNOG00000009000   | Foxj2          | -0.131       | -0.046       | -0.371      | 0.057       |
| 0.337 2.39E-02       |                |              |              |             |             |
| ENSRNOG00000027455   | RGD1564804     | 0.067 0.041  | 0.447 -0.021 | -0.436      |             |
| 2.39E-02             |                |              |              |             |             |
| ENSRNOG00000031641   | Rpl35a         | 1.130 0.602  | 1.123 -2.044 | -1.848      |             |
| 2.39E-02             |                |              |              |             |             |
| ENSRNOG00000051401   | AABR07049156.1 | -0.464       | 2.178 3.405  | -1.611      |             |
| -2.725 2.39E-02      |                |              |              |             |             |
| ENSRNOG00000017883   | Camsap1        | -0.010       | -0.108       | -0.406      |             |
| 0.191 0.323 2.40E-02 |                |              |              |             |             |
| ENSRNOG00000008569   | Ndufa6         | -0.066       | -0.305       | -0.524      |             |
| 0.293 0.460 2.40E-02 |                |              |              |             |             |
| ENSRNOG00000019940   | Ssr2           | 0.186 0.019  | 0.232 -0.064 | -0.307      |             |
| 2.40E-02             |                |              |              |             |             |
| ENSRNOG00000025370   | Zfp385c        | -0.123       | 0.443 1.495  | -0.286      | -           |
| 1.477 2.40E-02       |                |              |              |             |             |
| ENSRNOG00000020299   | Klc2           | -0.041       | -0.094       | -0.432      | 0.161       |
| 0.291 2.41E-02       |                |              |              |             |             |

|                                             |              |        |        |        |        |        |
|---------------------------------------------|--------------|--------|--------|--------|--------|--------|
| ENSRNOG00000004189<br>2.41E-02              | Helb         | -0.096 | 0.264  | 0.535  | -0.404 | -0.521 |
| ENSRNOG00000011654<br>2.41E-02              | Plk4         | 0.225  | 0.857  | 1.307  | -0.953 | -1.129 |
| ENSRNOG00000020086<br>0.243 2.41E-02        | Aar2         | -0.097 | -0.085 | -0.182 | 0.147  |        |
| ENSRNOG00000010119<br>2.41E-02              | Zmat3        | -0.040 | 0.079  | 0.554  | -0.399 | -0.563 |
| ENSRNOG00000008830<br>2.41E-02              | Nfe2l1       | 0.084  | 0.563  | 0.573  | -0.457 | -0.435 |
| ENSRNOG00000008218<br>2.41E-02              | Atp6v0e2     | 0.120  | 0.233  | 0.257  | -0.127 | -0.290 |
| ENSRNOG00000019283<br>2.42E-02              | P2ry2        | 0.035  | -0.288 | -0.588 | 0.210  | 0.515  |
| ENSRNOG00000003689<br>2.42E-02              | Nono         | -0.005 | 0.070  | 0.292  | -0.062 | -0.210 |
| ENSRNOG00000004773<br>2.42E-02              | Yaf2         | 0.121  | -0.241 | -0.536 | 0.143  | 0.307  |
| ENSRNOG00000012292<br>2.42E-02              | Alg8         | -0.012 | 0.338  | 0.496  | -0.371 | -0.506 |
| ENSRNOG000000055642<br>2.43E-02             | AC107096.1   | 0.262  | 0.608  | 1.999  | -1.119 | -2.522 |
| ENSRNOG000000025252<br>0.412 2.43E-02       | Yars2        | -0.084 | -0.337 | -0.590 | 0.185  |        |
| ENSRNOG000000023397<br>0.368 0.709 2.43E-02 | LOC102552732 | -0.099 | 0.137  | -0.158 |        |        |
| ENSRNOG000000002572<br>2.44E-02             | Cacybp       | 0.214  | 0.014  | 0.206  | -0.147 | -0.401 |
| ENSRNOG000000003127<br>0.101 0.375 2.44E-02 | Spryd4       | -0.150 | -0.162 | -0.346 |        |        |
| ENSRNOG000000020280<br>2.45E-02             | Armc6        | 0.064  | 0.048  | 0.174  | -0.089 | -0.405 |
| ENSRNOG000000032472<br>0.420 0.911 2.46E-02 | Adgrg2       | -0.535 | -0.132 | -0.106 |        |        |
| ENSRNOG000000058249<br>2.46E-02             | Pgk1         | 0.210  | -0.261 | -1.076 | 0.233  | 0.618  |
| ENSRNOG000000000860<br>0.580 2.46E-02       | Vwa7         | -0.278 | -0.191 | -0.755 | 0.043  |        |
| ENSRNOG000000008546<br>0.168 0.372 2.46E-02 | Mrpl35       | -0.119 | -0.206 | -0.452 |        |        |
| ENSRNOG000000002240<br>2.46E-02             | Dirc2        | 0.149  | -0.186 | -0.475 | 0.153  | 0.369  |
| ENSRNOG000000000464<br>0.310 2.46E-02       | Rxrb         | -0.013 | -0.071 | -0.351 | 0.127  |        |
| ENSRNOG00000014080<br>2.47E-02              | Kif23        | 0.023  | 0.407  | 1.587  | -0.345 | -1.493 |
| ENSRNOG00000018886<br>2.47E-02              | Aaed1        | 0.155  | -0.242 | -0.552 | 0.216  | 0.362  |
| ENSRNOG000000009535<br>0.191 0.327 2.47E-02 | Stoml2       | -0.057 | -0.141 | -0.363 |        |        |
| ENSRNOG000000028585<br>2.47E-02             | Tceal8       | 0.229  | 0.089  | 0.359  | -0.233 | -0.406 |
| ENSRNOG00000001134<br>2.47E-02              | Rfc5         | 0.294  | 0.330  | 0.504  | -0.317 | -0.450 |



|                                             |                |        |        |        |        |        |
|---------------------------------------------|----------------|--------|--------|--------|--------|--------|
| ENSRNOG00000036921<br>2.48E-02              | Tmsb10         | 0.129  | 0.241  | 1.192  | -0.227 | -0.890 |
| ENSRNOG00000025184<br>2.48E-02              | Prss35         | 0.784  | 1.612  | 2.876  | -1.871 | -2.286 |
| ENSRNOG00000049560<br>2.48E-02              | Glul           | 0.614  | -0.127 | -0.569 | 0.324  | 0.723  |
| ENSRNOG00000018522<br>0.603 2.48E-02        | Echs1          | -0.020 | -0.263 | -0.558 | 0.181  |        |
| ENSRNOG00000016690<br>2.48E-02              | Idi1           | -0.022 | 0.326  | 0.409  | -0.415 | -0.460 |
| ENSRNOG00000009325<br>2.48E-02              | Fuca1          | 0.245  | 0.406  | 0.895  | -0.453 | -0.552 |
| ENSRNOG00000000853<br>2.48E-02              | Aif1           | 0.149  | 0.367  | 0.870  | -0.237 | -0.640 |
| ENSRNOG00000001704<br>2.48E-02              | Runx1          | -0.549 | 2.189  | 2.974  | -1.653 | -1.552 |
| ENSRNOG00000009364<br>0.264 0.540 2.48E-02  | Ndufb9         | -0.159 | -0.326 | -0.683 |        |        |
| ENSRNOG00000010452<br>0.699 2.48E-02        | Cycs           | -0.050 | -0.485 | -0.924 | 0.286  |        |
| ENSRNOG00000023919<br>0.424 2.48E-02        | Gbas           | -0.087 | -0.203 | -0.642 | 0.137  |        |
| ENSRNOG00000016795<br>2.48E-02              | Rab16          | 0.183  | -0.222 | -0.517 | 0.227  | 0.318  |
| ENSRNOG00000002711<br>2.49E-02              | Nuf2           | 0.082  | 0.723  | 1.369  | -0.780 | -1.633 |
| ENSRNOG00000019627<br>0.953 2.49E-02        | Mybpc2         | 0.351  | -0.186 | -1.484 | 0.266  |        |
| ENSRNOG00000005009<br>2.50E-02              | Zfp3           | 0.259  | -0.303 | -0.729 | 0.235  | 0.444  |
| ENSRNOG00000024221<br>0.555 1.520 2.50E-02  | Mettl24        | -1.108 | -0.543 | -0.761 |        |        |
| ENSRNOG00000018932<br>0.471 2.50E-02        | Ccdc124        | 0.195  | -0.161 | -0.645 | 0.272  |        |
| ENSRNOG00000012830<br>2.50E-02              | Paqr8          | -0.296 | 0.258  | 1.581  | -0.146 | -1.432 |
| ENSRNOG00000005301<br>0.177 0.313 2.51E-02  | Eif2b4         | -0.076 | -0.188 | -0.448 |        |        |
| ENSRNOG000000057133<br>1.133 1.696 2.51E-02 | AABR07034455.2 | -0.069 | -1.238 | -2.405 |        |        |
| ENSRNOG000000032856<br>0.627 1.608 2.51E-02 | Tssklb         | -0.945 | -0.714 | -0.793 |        |        |
| ENSRNOG000000022748<br>0.232 0.481 2.51E-02 | Tmem126a       | -0.061 | -0.428 | -0.677 |        |        |
| ENSRNOG00000017037<br>2.52E-02              | Otud3          | 0.045  | -0.124 | -0.732 | 0.159  | 0.558  |
| ENSRNOG00000024629<br>0.542 2.52E-02        | Hadha          | -0.520 | -0.286 | -0.256 | 0.227  |        |
| ENSRNOG000000055295<br>0.505 2.52E-02       | Pecr           | -0.122 | -0.332 | -0.829 | 0.354  |        |
| ENSRNOG00000009545<br>0.412 2.52E-02        | Polr1a         | -0.056 | 0.322  | 0.584  | -0.431 | -      |
| ENSRNOG00000017741<br>2.52E-02              | Nudt5          | -0.078 | 0.350  | 0.819  | -0.190 | -0.509 |

|                      |                |        |        |        |        |        |          |
|----------------------|----------------|--------|--------|--------|--------|--------|----------|
| ENSRNOG00000010438   | Cpt1b          | -0.380 | -0.067 | -0.210 | 0.028  |        |          |
| 0.422 2.52E-02       |                |        |        |        |        |        |          |
| ENSRNOG00000017172   | Mvb12b         | 0.305  | -0.274 | -0.855 | 0.297  |        |          |
| 0.499 2.53E-02       |                |        |        |        |        |        |          |
| ENSRNOG00000002935   | Ankrd40        | 0.005  | -0.179 | -0.513 | 0.141  |        |          |
| 0.317 2.53E-02       |                |        |        |        |        |        |          |
| ENSRNOG000000036576  | Zdhhc6         | -0.022 | 0.034  | 0.332  | 0.007  | -0.318 |          |
| 2.53E-02             |                |        |        |        |        |        |          |
| ENSRNOG000000010326  | Col20a1        | 0.465  | 0.573  | 0.800  | -1.000 | -0.982 |          |
| 2.53E-02             |                |        |        |        |        |        |          |
| ENSRNOG000000018113  | Anlnl1         | 0.353  | 0.694  | 1.943  | -0.818 | -1.747 |          |
| 2.53E-02             |                |        |        |        |        |        |          |
| ENSRNOG000000048256  | Fam160a1       | 0.125  | -0.217 | -0.986 | 0.040  |        |          |
| 0.602 2.54E-02       |                |        |        |        |        |        |          |
| ENSRNOG000000016301  | Dmrt2          | -0.277 | -0.618 | -1.013 | 0.156  |        |          |
| 0.531 2.54E-02       |                |        |        |        |        |        |          |
| ENSRNOG000000033057  | Gapdh-ps2      | 0.377  | -0.403 | -1.113 | 0.187  |        |          |
| 0.766 2.54E-02       |                |        |        |        |        |        |          |
| ENSRNOG000000042740  | Mrpl42         | 0.073  | -0.443 | -0.807 | 0.317  |        |          |
| 0.490 2.55E-02       |                |        |        |        |        |        |          |
| ENSRNOG000000001088  | Rfc3           | 0.102  | -0.001 | 0.288  | -0.102 | -0.461 |          |
| 2.56E-02             |                |        |        |        |        |        |          |
| ENSRNOG000000009495  | Src            | 0.004  | 0.274  | 0.992  | 0.110  | -0.628 | 2.57E-02 |
|                      |                |        |        |        |        |        |          |
| ENSRNOG000000014571  | Dbnidd2        | 0.323  | -0.142 | -0.563 | 0.227  |        |          |
| 0.447 2.57E-02       |                |        |        |        |        |        |          |
| ENSRNOG000000009912  | Fgr            | 0.142  | 0.836  | 1.263  | -0.631 | -0.799 |          |
| 2.58E-02             |                |        |        |        |        |        |          |
| ENSRNOG000000058472  | AABR07049292.1 | 0.030  | 0.178  | -0.330 | 0.458  |        |          |
| 0.820 2.61E-02       |                |        |        |        |        |        |          |
| ENSRNOG000000003749  | Xk             | 0.231  | -0.267 | -0.567 | 0.230  | 0.395  |          |
| 2.61E-02             |                |        |        |        |        |        |          |
| ENSRNOG000000047247  | Ptprs          | 0.061  | -0.262 | -0.795 | 0.241  | 0.491  |          |
| 2.61E-02             |                |        |        |        |        |        |          |
| ENSRNOG000000052247  | Manba          | 0.204  | 0.360  | 0.630  | -0.239 | -0.500 |          |
| 2.61E-02             |                |        |        |        |        |        |          |
| ENSRNOG000000004011  | Nedd1          | 0.043  | 0.042  | -0.556 | 0.125  | 0.451  | 2.61E-02 |
|                      |                |        |        |        |        |        |          |
| ENSRNOG000000045749  | LOC100361879   | -0.047 | -0.322 | -0.685 |        |        |          |
| 0.403 0.651 2.62E-02 |                |        |        |        |        |        |          |
| ENSRNOG000000010274  | Smc4           | 0.284  | -0.416 | -0.073 | -0.211 | -      |          |
| 0.557 2.62E-02       |                |        |        |        |        |        |          |
| ENSRNOG000000026649  | Dnmt3a         | 0.196  | -0.406 | -0.851 | 0.348  |        |          |
| 0.532 2.62E-02       |                |        |        |        |        |        |          |
| ENSRNOG000000017912  | Atp2a3         | -0.089 | -0.078 | -0.274 |        |        |          |
| 0.068 0.440 2.62E-02 |                |        |        |        |        |        |          |
| ENSRNOG000000005695  | Mgp            | -0.354 | 0.349  | 1.255  | -0.437 | -0.773 |          |
| 2.62E-02             |                |        |        |        |        |        |          |
| ENSRNOG000000007637  | Acer2          | -0.190 | -0.136 | -0.244 | 0.433  |        |          |
| 0.791 2.63E-02       |                |        |        |        |        |        |          |
| ENSRNOG000000002373  | Akap1          | -0.226 | -0.274 | -0.605 | 0.162  |        |          |
| 0.466 2.63E-02       |                |        |        |        |        |        |          |
| ENSRNOG000000052840  | Tanc2          | -0.058 | 0.225  | 0.647  | -0.465 | -0.669 |          |
| 2.64E-02             |                |        |        |        |        |        |          |

|                    |                |          |        |        |        |          |
|--------------------|----------------|----------|--------|--------|--------|----------|
| ENSRNOG00000013783 | Efhd2          | -0.015   | 0.331  | 0.864  | -0.164 | -0.490   |
| 2.64E-02           |                |          |        |        |        |          |
| ENSRNOG00000058324 | AC098750.5     | -0.161   |        | -0.328 |        | -0.590   |
| 0.346              | 0.598          | 2.66E-02 |        |        |        |          |
| ENSRNOG00000012502 | Stk17b         | 0.040    | -0.139 |        | 0.518  | -0.061   |
| 0.566              | 2.67E-02       |          |        |        |        | -        |
| ENSRNOG00000008639 | Pabpc1         | 0.011    | 0.265  | 0.787  | -0.294 | -0.430   |
| 2.67E-02           |                |          |        |        |        |          |
| ENSRNOG00000007540 | Msc            | -0.125   | 0.706  | 1.444  | -0.798 | -1.142   |
| 2.68E-02           |                |          |        |        |        |          |
| ENSRNOG00000001847 | Ccdc91         | 0.201    | -0.184 |        | -0.771 | 0.148    |
| 0.482              | 2.68E-02       |          |        |        |        |          |
| ENSRNOG00000002112 | Zfp644         | -0.154   |        | -0.152 |        | -0.295   |
| 0.186              | 0.329          | 2.68E-02 |        |        |        |          |
| ENSRNOG00000018509 | Cx3cr1         | 0.055    | 0.450  | 1.553  | -0.580 | -1.657   |
| 2.68E-02           |                |          |        |        |        |          |
| ENSRNOG00000003837 | Mif4gd         | -0.045   |        | -0.149 |        | -0.470   |
| 0.247              | 0.431          | 2.69E-02 |        |        |        |          |
| ENSRNOG00000005061 | Dlst           | -0.272   |        | -0.193 |        | -0.504   |
| 0.430              | 2.69E-02       |          |        |        |        | 0.123    |
| ENSRNOG00000046832 | LOC100363642   |          | 0.053  | -0.286 |        | -0.436   |
| 0.228              | 0.284          | 2.71E-02 |        |        |        |          |
| ENSRNOG00000017737 | Dgkz           | -0.071   |        | -0.047 |        | -0.411   |
| 0.534              | 2.71E-02       |          |        |        |        | 0.210    |
| ENSRNOG00000012685 | Adck1          | 0.035    | -0.188 |        | -0.551 | 0.131    |
| 2.71E-02           |                |          |        |        |        | 0.390    |
| ENSRNOG00000015134 | Map3k12        | -0.044   |        | -0.122 |        | -0.313   |
| 0.163              | 0.296          | 2.71E-02 |        |        |        |          |
| ENSRNOG00000029995 | Herpud2        | 0.126    | -0.131 |        | -0.292 | 0.132    |
| 0.237              | 2.73E-02       |          |        |        |        |          |
| ENSRNOG00000005130 | Ogdh           | -0.163   |        | -0.152 |        | -0.678   |
| 0.575              | 2.74E-02       |          |        |        |        | 0.068    |
| ENSRNOG00000017259 | Tacc3          | -0.039   |        | 0.304  | 0.836  | -0.395   |
| 2.74E-02           |                |          |        |        |        | -0.624   |
| ENSRNOG00000010711 | Dicer1         | 0.063    | -0.175 |        | -0.490 | 0.104    |
| 0.351              | 2.74E-02       |          |        |        |        |          |
| ENSRNOG00000028047 | Mecr           | -0.139   |        | -0.187 |        | -0.576   |
| 0.506              | 2.74E-02       |          |        |        |        | 0.190    |
| ENSRNOG00000016460 | Clu            | 0.274    | 0.006  | -0.067 |        | 0.341    |
|                    |                |          |        |        | 0.456  | 2.74E-02 |
| ENSRNOG00000026928 | AABR07008097.1 |          | 0.176  | -0.218 |        | -1.084   |
| 0.282              | 0.645          | 2.75E-02 |        |        |        |          |
| ENSRNOG00000018126 | Abca1          | 0.254    | 0.526  | 1.214  | -0.284 | -0.768   |
| 2.75E-02           |                |          |        |        |        |          |
| ENSRNOG00000010375 | Slc39a2        | 0.293    | 1.029  | 2.266  | -1.297 | -2.040   |
| 2.76E-02           |                |          |        |        |        |          |
| ENSRNOG00000011981 | Slc39a13       | 0.131    | 0.120  | 0.124  | -0.095 | -0.291   |
| 2.76E-02           |                |          |        |        |        |          |
| ENSRNOG00000048088 | Mest           | 0.025    | 0.213  | 1.272  | -0.325 | -1.140   |
| 2.77E-02           |                |          |        |        |        |          |
| ENSRNOG00000037658 | Gprasp2        | 0.059    | 0.004  | 0.762  | 0.133  | -0.639   |
| 2.77E-02           |                |          |        |        |        |          |
| ENSRNOG00000016249 | Cep85          | -0.078   |        | -0.103 |        | -0.412   |
| 0.300              | 2.78E-02       |          |        |        |        | 0.103    |

|                    |          |        |        |        |        |        |          |
|--------------------|----------|--------|--------|--------|--------|--------|----------|
| ENSRNOG00000024365 | Ect2     | -0.271 | 0.384  | 1.633  | 0.221  | -1.831 |          |
| 2.78E-02           |          |        |        |        |        |        |          |
| ENSRNOG00000031335 | Ankrd37  | 0.026  | -0.716 |        | -0.688 | 0.642  |          |
| 0.903              |          |        |        |        |        |        | 2.79E-02 |
| ENSRNOG00000006364 | Dld      | -0.204 | -0.360 |        | -0.574 | 0.195  |          |
| 0.479              |          |        |        |        |        |        | 2.79E-02 |
| ENSRNOG00000000858 | Sapcd1   | -0.277 | -0.364 |        | -0.622 |        |          |
| 0.291              |          |        |        |        |        |        | 2.79E-02 |
| ENSRNOG00000009713 | Oxa11    | -0.155 | -0.154 |        | -0.357 | 0.151  |          |
| 0.326              |          |        |        |        |        |        | 2.79E-02 |
| ENSRNOG00000047321 | Hba2     | -0.742 | -0.519 |        | -1.032 | 0.567  |          |
| 1.024              |          |        |        |        |        |        | 2.79E-02 |
| ENSRNOG00000011952 | Samm50   | -0.057 | -0.206 |        | -0.574 |        |          |
| 0.169              |          |        |        |        |        |        | 2.79E-02 |
| ENSRNOG00000014727 | Fahd1    | -0.268 | -0.302 |        | -0.504 | 0.148  |          |
| 0.473              |          |        |        |        |        |        | 2.79E-02 |
| ENSRNOG00000016888 | Pask     | 0.051  | 0.334  | 1.164  | -1.041 | -1.466 |          |
| 2.79E-02           |          |        |        |        |        |        |          |
| ENSRNOG00000046168 | Ppm11    | 0.083  | -0.187 |        | -0.849 | 0.155  | 0.522    |
| 2.80E-02           |          |        |        |        |        |        |          |
| ENSRNOG00000025155 | Lmtk2    | 0.043  | -0.018 |        | -0.487 | 0.045  | 0.427    |
| 2.80E-02           |          |        |        |        |        |        |          |
| ENSRNOG00000004668 | Slc25a35 | 0.158  | -0.182 |        | -0.374 | 0.243  |          |
| 0.404              |          |        |        |        |        |        | 2.80E-02 |
| ENSRNOG00000008256 | Mrpl38   | -0.119 | -0.156 |        | -0.496 |        |          |
| 0.210              |          |        |        |        |        |        | 2.80E-02 |
| ENSRNOG00000016214 | Ag1      | 0.108  | -0.276 |        | -1.207 | 0.212  | 0.764    |
| 2.80E-02           |          |        |        |        |        |        |          |
| ENSRNOG00000015603 | Prkce    | -0.002 | -0.047 |        | -0.758 | 0.071  |          |
| 0.656              |          |        |        |        |        |        | 2.81E-02 |
| ENSRNOG00000020541 | Nprl3    | 0.117  | 0.028  | -0.400 | 0.174  | 0.403  | 2.82E-02 |
|                    |          |        |        |        |        |        |          |
| ENSRNOG00000014811 | Cyhr1    | 0.079  | -0.150 |        | -0.575 | 0.213  | 0.339    |
| 2.82E-02           |          |        |        |        |        |        |          |
| ENSRNOG00000012864 | Ern1     | 0.028  | 0.051  | -0.395 | 0.063  | 0.345  | 2.84E-02 |
|                    |          |        |        |        |        |        |          |
| ENSRNOG00000029980 | Zbtb16   | -0.190 | -0.383 |        | -0.911 |        |          |
| 0.252              |          |        |        |        |        |        | 2.84E-02 |
| ENSRNOG00000005568 | Pcnxl4   | -0.272 | -0.067 |        | -0.363 |        |          |
| 0.027              |          |        |        |        |        |        | 2.84E-02 |
| ENSRNOG00000019024 | Trim67   | -0.618 | 0.595  | -1.335 |        | -0.232 |          |
| 2.635              |          |        |        |        |        |        | 2.84E-02 |
| ENSRNOG00000047393 | Krt18    | -0.793 | 5.346  | 7.621  | -4.023 | -4.400 |          |
| 2.84E-02           |          |        |        |        |        |        |          |
| ENSRNOG00000029886 | Hba1     | -0.768 | -0.580 |        | -1.049 | 0.581  |          |
| 1.026              |          |        |        |        |        |        | 2.86E-02 |
| ENSRNOG00000017307 | Prss23   | 0.000  | 0.227  | 0.350  | -0.238 | -0.311 |          |
| 2.86E-02           |          |        |        |        |        |        |          |
| ENSRNOG00000011831 | Nudt18   | 0.371  | 0.254  | 0.194  | -0.125 | -0.483 |          |
| 2.86E-02           |          |        |        |        |        |        |          |
| ENSRNOG00000005762 | Rab22a   | 0.179  | -0.216 |        | -0.466 | 0.162  |          |
| 0.245              |          |        |        |        |        |        | 2.88E-02 |
| ENSRNOG00000025349 | Maneal   | 0.267  | 0.103  | -0.295 | 0.777  | 1.111  |          |
| 2.88E-02           |          |        |        |        |        |        |          |

|                                             |                |        |        |        |        |        |
|---------------------------------------------|----------------|--------|--------|--------|--------|--------|
| ENSRNOG00000002187<br>2.840 2.88E-02        | Ropn1          | -2.261 | -1.422 | -2.283 | 1.675  |        |
| ENSRNOG000000060703<br>2.135 2.88E-02       | Troap          | -0.008 | -0.006 | 1.460  | -0.240 | -      |
| ENSRNOG000000051471<br>1.327 2.89E-02       | AABR07063346.1 | 0.566  | 1.309  | 1.457  | -1.749 | -      |
| ENSRNOG000000015858<br>0.963 2.89E-02       | Hyal1          | -0.411 | -0.530 | -1.039 | 0.286  |        |
| ENSRNOG000000009205<br>0.393 2.89E-02       | Lmo4           | -0.037 | -0.082 | -0.406 | 0.267  |        |
| ENSRNOG000000001544<br>0.580 2.89E-02       | Cyyr1          | -0.045 | -0.262 | -0.478 | 0.229  |        |
| ENSRNOG000000018288<br>0.289 2.90E-02       | Ncoa6          | -0.011 | -0.055 | -0.295 | 0.117  |        |
| ENSRNOG000000031706<br>0.253 0.579 2.90E-02 | AABR07027388.1 | 0.242  | -0.290 | -1.126 |        |        |
| ENSRNOG000000007805<br>2.90E-02             | Mybl2          | -0.101 | 0.932  | 1.773  | -1.502 | -1.711 |
| ENSRNOG000000006086<br>2.90E-02             | Lynx1          | 0.031  | -0.422 | -1.311 | 0.205  | 0.637  |
| ENSRNOG000000013742<br>0.621 2.90E-02       | Large          | -0.513 | -0.086 | -0.391 | -0.013 |        |
| ENSRNOG000000006326<br>2.91E-02             | Atraid         | 0.073  | 0.004  | 0.210  | -0.049 | -0.307 |
| ENSRNOG000000006763<br>0.205 2.92E-02       | Rbm18          | -0.011 | -0.078 | -0.224 | 0.041  |        |
| ENSRNOG000000023850<br>2.92E-02             | Tbrg1          | 0.216  | 0.166  | 0.321  | -0.258 | -0.337 |
| ENSRNOG000000016617<br>2.92E-02             | Wwtr1          | 0.049  | 0.406  | 0.551  | -0.523 | -0.498 |
| ENSRNOG000000040300<br>2.93E-02             | Raet1c         | 0.189  | 0.158  | -0.583 | 0.240  | 1.403  |
| ENSRNOG000000018611<br>0.645 2.93E-02       | Tpsb2          | -0.157 | -0.084 | -0.004 | 0.493  |        |
| ENSRNOG000000000661<br>0.368 2.93E-02       | Hps4           | -0.084 | -0.171 | -0.487 | 0.125  |        |
| ENSRNOG000000028255<br>2.93E-02             | Usp36          | -0.026 | 0.018  | -0.309 | 0.006  | 0.304  |
| ENSRNOG000000015109<br>2.93E-02             | Ubxn8          | -0.132 | 0.312  | 0.673  | -0.338 | -0.520 |
| ENSRNOG000000016348<br>2.247 2.93E-02       | Tat            | -1.298 | -1.480 | -1.600 | 1.496  |        |
| ENSRNOG000000015357<br>2.93E-02             | Bmper          | 0.349  | 0.087  | 0.219  | -0.133 | -0.524 |
| ENSRNOG000000032948<br>2.94E-02             | Tyk2           | -0.066 | 0.269  | 0.458  | -0.126 | -0.259 |
| ENSRNOG000000047322<br>2.94E-02             | Crb3           | 0.095  | -0.411 | -1.128 | 0.389  | 0.665  |
| ENSRNOG000000018057<br>0.330 2.94E-02       | Mrpl2          | -0.098 | -0.152 | -0.448 | 0.151  |        |
| ENSRNOG000000002496<br>2.557 2.94E-02       | Stxbp5l        | -0.917 | 1.823  | 3.423  | -1.666 | -      |
| ENSRNOG000000013669<br>0.307 2.95E-02       | Pik3r4         | -0.054 | 0.191  | 0.332  | -0.222 | -      |

|                    |                |          |        |        |        |        |        |
|--------------------|----------------|----------|--------|--------|--------|--------|--------|
| ENSRNOG00000002778 | Aatf           | 0.029    | 0.101  | 0.417  | -0.113 | -0.381 |        |
| 2.95E-02           |                |          |        |        |        |        |        |
| ENSRNOG00000050669 | LOC100911515   |          |        | 0.096  | -0.481 | -1.112 |        |
| 0.450              | 0.779          | 2.96E-02 |        |        |        |        |        |
| ENSRNOG00000031769 | Chchd7         |          | -0.127 |        | -0.300 | -0.423 |        |
| 0.295              | 0.475          | 2.96E-02 |        |        |        |        |        |
| ENSRNOG00000016311 | Slc6a2         |          | 0.540  | -0.114 |        | -1.196 | 0.500  |
| 1.276              | 2.97E-02       |          |        |        |        |        |        |
| ENSRNOG00000017495 | Klhdc3         |          | 0.287  | -0.399 |        | -0.840 | 0.295  |
| 0.492              | 2.97E-02       |          |        |        |        |        |        |
| ENSRNOG00000055667 | AC119111.1     | -0.006   |        | 0.320  | 0.869  | -0.522 | -      |
| 1.184              | 2.97E-02       |          |        |        |        |        |        |
| ENSRNOG00000031127 | Snrpe          | 0.168    | 0.054  | 0.366  | -0.115 | -0.393 |        |
| 2.97E-02           |                |          |        |        |        |        |        |
| ENSRNOG00000033262 | Reep6          | -0.344   |        | 0.158  | -0.417 | 0.162  | 0.759  |
| 2.97E-02           |                |          |        |        |        |        |        |
| ENSRNOG00000007500 | Top1mt         |          | -0.112 |        | -0.261 | -0.667 |        |
| 0.244              | 0.413          | 2.97E-02 |        |        |        |        |        |
| ENSRNOG00000046150 | AABR07008805.1 |          | -0.143 |        | -0.086 | -0.401 |        |
| 0.381              | 0.632          | 2.98E-02 |        |        |        |        |        |
| ENSRNOG00000016923 | Clptm1l        |          | -0.008 |        | 0.051  | 0.292  | -0.057 |
| 0.232              | 2.98E-02       |          |        |        |        |        | -      |
| ENSRNOG00000016358 | Apba2          | -0.653   |        | -0.155 |        | -0.774 | 0.070  |
| 1.746              | 2.98E-02       |          |        |        |        |        |        |
| ENSRNOG00000023803 | Cmya5          | 0.267    | -0.267 |        | -1.061 | 0.171  | 0.718  |
| 2.98E-02           |                |          |        |        |        |        |        |
| ENSRNOG00000025689 | Abhd1          | -0.151   |        | -0.018 |        | -0.055 | 0.169  |
| 0.464              | 2.98E-02       |          |        |        |        |        |        |
| ENSRNOG00000058096 | AABR07021704.1 |          | -0.260 |        | -0.173 | -0.759 |        |
| -0.122             | 0.695          | 3.00E-02 |        |        |        |        |        |
| ENSRNOG00000057661 | AABR07029863.2 |          | -0.173 |        | -0.380 | -0.765 |        |
| 0.506              | 0.630          | 3.01E-02 |        |        |        |        |        |
| ENSRNOG00000057701 | Myom1          | -0.113   |        | -0.024 |        | -0.564 | 0.081  |
| 0.452              | 3.01E-02       |          |        |        |        |        |        |
| ENSRNOG00000007405 | Krba1          | -0.407   |        | -0.140 |        | -0.339 | 0.157  |
| 0.366              | 3.01E-02       |          |        |        |        |        |        |
| ENSRNOG00000042492 | Rfwd2          | 0.235    | -0.263 |        | -0.599 | 0.163  | 0.337  |
| 3.01E-02           |                |          |        |        |        |        |        |
| ENSRNOG00000047023 | Aldh1l1        |          | -0.026 |        | 0.163  | -0.314 | -0.040 |
| 0.334              | 3.01E-02       |          |        |        |        |        |        |
| ENSRNOG00000029205 | Zfp354c        |          | 0.143  | 0.001  | 0.334  | 0.011  | -0.378 |
| 3.01E-02           |                |          |        |        |        |        |        |
| ENSRNOG00000020813 | Ltbp3          | 0.183    | 0.149  | 0.217  | -0.123 | -0.385 |        |
| 3.01E-02           |                |          |        |        |        |        |        |
| ENSRNOG00000007235 | Atp5g1         |          | -0.185 |        | -0.369 | -0.773 |        |
| 0.289              | 0.614          | 3.02E-02 |        |        |        |        |        |
| ENSRNOG00000004457 | RGD1560617     |          | 0.137  | 0.157  | 0.703  | -0.239 | -0.500 |
| 3.02E-02           |                |          |        |        |        |        |        |
| ENSRNOG00000018570 | Clqtnf3        |          | 0.355  | 0.831  | 2.055  | -1.191 | -1.738 |
| 3.02E-02           |                |          |        |        |        |        |        |
| ENSRNOG00000012209 | Cdadcl         |          | 0.175  | -0.361 |        | -0.582 | 0.233  |
| 0.410              | 3.02E-02       |          |        |        |        |        |        |
| ENSRNOG00000018179 | Glt8d1         |          | 0.103  | 0.168  | 0.465  | -0.296 | -0.418 |
| 3.02E-02           |                |          |        |        |        |        |        |



|                    |           |          |          |        |        |        |
|--------------------|-----------|----------|----------|--------|--------|--------|
| ENSRNOG00000019349 | Sf3a2     | -0.083   | -0.032   | -0.247 | 0.153  |        |
| 0.325              |           | 3.18E-02 |          |        |        |        |
| ENSRNOG00000027901 | Mrm1      | -0.131   | -0.033   | -0.474 | 0.114  |        |
| 0.484              |           | 3.18E-02 |          |        |        |        |
| ENSRNOG00000004404 | Tac4      | -0.176   | 2.825    | 4.996  | -2.553 | -3.498 |
| 3.18E-02           |           |          |          |        |        |        |
| ENSRNOG00000015026 | Arhgef11  | -0.076   | -0.095   | -0.372 |        |        |
| 0.105              |           | 0.314    | 3.18E-02 |        |        |        |
| ENSRNOG00000019311 | Nfkb2     | -0.027   | 0.907    | 1.084  | -0.602 | -0.597 |
| 3.18E-02           |           |          |          |        |        |        |
| ENSRNOG00000014871 | Zic4      | 1.780    | 1.854    | 1.747  | -1.312 | -2.219 |
| 3.19E-02           |           |          |          |        |        |        |
| ENSRNOG00000047235 | Vps26b    | -0.080   | -0.094   | -0.186 |        |        |
| 0.153              |           | 0.170    | 3.19E-02 |        |        |        |
| ENSRNOG00000008843 | Eci1      | -0.258   | -0.061   | -0.123 | 0.132  |        |
| 0.447              |           | 3.20E-02 |          |        |        |        |
| ENSRNOG00000040122 | Myoz1     | 0.631    | -0.281   | -1.121 | 0.368  | 0.744  |
| 3.21E-02           |           |          |          |        |        |        |
| ENSRNOG00000013653 | Pdlim7    | 0.078    | -0.106   | -0.858 | 0.194  |        |
| 0.534              |           | 3.21E-02 |          |        |        |        |
| ENSRNOG00000001878 | Klhl22    | 0.160    | -0.070   | -0.399 | 0.145  |        |
| 0.332              |           | 3.21E-02 |          |        |        |        |
| ENSRNOG00000004681 | Eny2      | -0.098   | 0.139    | 0.658  | -0.178 | -0.465 |
| 3.21E-02           |           |          |          |        |        |        |
| ENSRNOG00000002831 | Wfikkn2   | -0.114   | 0.265    | 0.664  | -0.313 | -      |
| 0.759              |           | 3.21E-02 |          |        |        |        |
| ENSRNOG00000045637 | Rnf14     | -0.010   | -0.130   | -0.270 | 0.074  |        |
| 0.259              |           | 3.21E-02 |          |        |        |        |
| ENSRNOG00000039076 | LOC688452 | -0.005   | 0.234    | 0.878  | -0.197 | -      |
| 0.607              |           | 3.22E-02 |          |        |        |        |
| ENSRNOG00000015982 | Wnt11     | -0.239   | -0.329   | -0.531 | 0.254  |        |
| 0.568              |           | 3.23E-02 |          |        |        |        |
| ENSRNOG00000036692 | Gcgr      | -1.678   | -0.839   | -1.461 | 0.811  |        |
| 1.486              |           | 3.24E-02 |          |        |        |        |
| ENSRNOG00000017405 | Raly      | -0.141   | -0.068   | -0.295 | 0.206  |        |
| 0.319              |           | 3.24E-02 |          |        |        |        |
| ENSRNOG00000052365 | 3082ex4-5 | 0.045    | -0.023   | -0.338 | 0.211  |        |
| 0.628              |           | 3.26E-02 |          |        |        |        |
| ENSRNOG00000060511 | Tcap      | 0.330    | -0.098   | -0.630 | 0.193  | 0.531  |
| 3.26E-02           |           |          |          |        |        |        |
| ENSRNOG00000008246 | Emilin1   | -0.048   | 0.165    | 0.678  | -0.064 | -      |
| 0.502              |           | 3.26E-02 |          |        |        |        |
| ENSRNOG00000046261 | Acp5      | 0.314    | 0.291    | 1.128  | -0.419 | -0.952 |
| 3.26E-02           |           |          |          |        |        |        |
| ENSRNOG00000003330 | Acsf2     | -0.334   | 0.062    | -0.007 | 0.287  | 0.543  |
| 3.26E-02           |           |          |          |        |        |        |
| ENSRNOG00000043143 | Eml1      | 0.047    | -0.134   | -0.860 | 0.195  | 0.503  |
| 3.28E-02           |           |          |          |        |        |        |
| ENSRNOG00000002232 | Aff1      | -0.086   | -0.032   | -0.657 | 0.095  |        |
| 0.537              |           | 3.28E-02 |          |        |        |        |
| ENSRNOG00000021420 | Tirap     | 0.140    | -0.114   | -0.377 | 0.057  | 0.429  |
| 3.28E-02           |           |          |          |        |        |        |
| ENSRNOG00000003835 | Slc43a2   | -0.035   | 0.518    | 0.775  | -0.392 | -      |
| 0.586              |           | 3.28E-02 |          |        |        |        |



|                      |                |        |        |        |               |
|----------------------|----------------|--------|--------|--------|---------------|
| ENSRNOG00000013328   | Rbpms          | -0.230 | -0.229 | -0.185 | 0.443         |
| 0.541 3.29E-02       |                |        |        |        |               |
| ENSRNOG00000036659   | Fn3k           | 0.548  | -0.263 | -1.217 | 0.335 0.742   |
| 3.29E-02             |                |        |        |        |               |
| ENSRNOG00000014065   | Zfp653         | -0.061 | -0.089 | -0.318 |               |
| 0.231 0.376 3.29E-02 |                |        |        |        |               |
| ENSRNOG00000012204   | LOC100294508   | 0.291  | -0.102 | -0.639 |               |
| 0.123 0.374 3.29E-02 |                |        |        |        |               |
| ENSRNOG00000031827   | Arih2          | 0.040  | -0.095 | -0.409 | 0.058 0.261   |
| 3.29E-02             |                |        |        |        |               |
| ENSRNOG00000033110   | Svep1          | 0.260  | 0.215  | 0.704  | -0.445 -0.751 |
| 3.29E-02             |                |        |        |        |               |
| ENSRNOG00000025383   | LOC100365902   | -0.166 | -0.248 | -0.559 |               |
| 0.166 0.383 3.29E-02 |                |        |        |        |               |
| ENSRNOG00000002461   | Nid1           | -0.030 | 0.116  | 0.615  | -0.287 -0.607 |
| 3.29E-02             |                |        |        |        |               |
| ENSRNOG00000059579   | Gpt2           | 0.311  | -0.356 | -1.531 | 0.357 0.934   |
| 3.30E-02             |                |        |        |        |               |
| ENSRNOG00000018164   | Spes2          | 0.254  | -0.308 | -0.507 | 0.254 0.290   |
| 3.30E-02             |                |        |        |        |               |
| ENSRNOG00000009183   | Szrd1          | 0.059  | -0.080 | -0.379 | 0.078 0.258   |
| 3.32E-02             |                |        |        |        |               |
| ENSRNOG00000060846   | Morc4          | -0.037 | 0.170  | 0.522  | -0.251 -0.435 |
| 3.32E-02             |                |        |        |        |               |
| ENSRNOG00000017609   | Cnga4          | 0.889  | 1.178  | 1.532  | -1.064 -1.674 |
| 3.32E-02             |                |        |        |        |               |
| ENSRNOG00000008451   | Fut8           | 0.107  | 0.177  | 0.388  | -0.122 -0.400 |
| 3.34E-02             |                |        |        |        |               |
| ENSRNOG00000000341   | Nid2           | 0.088  | 0.024  | 0.210  | -0.096 -0.559 |
| 3.34E-02             |                |        |        |        |               |
| ENSRNOG00000024809   | Ntmt1          | -0.227 | -0.254 | -0.586 | 0.206         |
| 0.410 3.34E-02       |                |        |        |        |               |
| ENSRNOG00000004333   | Flywch1        | -0.072 | -0.045 | -0.310 |               |
| 0.132 0.360 3.35E-02 |                |        |        |        |               |
| ENSRNOG00000032788   | Dysf           | -0.063 | 0.376  | 0.460  | -0.378 -0.374 |
| 3.35E-02             |                |        |        |        |               |
| ENSRNOG00000023465   | LOC500300      | -0.137 | -0.777 | -1.094 |               |
| 0.673 0.907 3.35E-02 |                |        |        |        |               |
| ENSRNOG00000007097   | Gpatch3        | -0.077 | -0.219 | -0.443 |               |
| 0.386 0.446 3.36E-02 |                |        |        |        |               |
| ENSRNOG00000012952   | Lrig1          | 0.090  | -0.217 | -0.911 | 0.206 0.514   |
| 3.37E-02             |                |        |        |        |               |
| ENSRNOG00000010169   | Atpaf1         | -0.170 | -0.361 | -0.787 |               |
| 0.184 0.493 3.37E-02 |                |        |        |        |               |
| ENSRNOG00000027480   | Tmem116        | -0.575 | -0.223 | -0.898 |               |
| 0.112 0.873 3.37E-02 |                |        |        |        |               |
| ENSRNOG00000008279   | Mrps15         | 0.142  | -0.234 | -0.610 | 0.238         |
| 0.379 3.37E-02       |                |        |        |        |               |
| ENSRNOG00000023923   | Fastkd2        | -0.035 | -0.288 | -0.531 |               |
| 0.147 0.383 3.37E-02 |                |        |        |        |               |
| ENSRNOG00000021669   | Mybl1          | -0.095 | 0.338  | 0.875  | -0.248 -0.617 |
| 3.37E-02             |                |        |        |        |               |
| ENSRNOG00000002734   | AABR07042077.1 | 0.876  | 1.064  | 2.624  | -1.306 -      |
| 2.107 3.38E-02       |                |        |        |        |               |

|                     |                |        |        |        |        |        |
|---------------------|----------------|--------|--------|--------|--------|--------|
| ENSRNOG00000060087  | Adralb         | -1.528 | 2.443  | 3.892  | -2.296 | -      |
| 2.521               |                |        |        |        |        |        |
| 3.38E-02            |                |        |        |        |        |        |
| ENSRNOG00000059698  | Gpr141         | -0.293 | 1.471  | 2.692  | -1.578 | -      |
| 1.862               |                |        |        |        |        |        |
| 3.38E-02            |                |        |        |        |        |        |
| ENSRNOG00000025676  | Fam198a        | 0.245  | 0.534  | 1.254  | -0.240 | -0.791 |
| 3.39E-02            |                |        |        |        |        |        |
| ENSRNOG00000052810  | Cyp2c11        | -1.325 | -0.967 |        | -1.736 |        |
| 1.704               |                |        |        |        |        |        |
| 2.340               |                |        |        |        |        |        |
| 3.40E-02            |                |        |        |        |        |        |
| ENSRNOG00000001258  | Snx8           | -0.048 | 0.217  | 0.758  | -0.089 | -0.466 |
| 3.40E-02            |                |        |        |        |        |        |
| ENSRNOG00000025643  | Ccdc13         | 0.059  | -0.073 | 0.844  | 0.056  | -1.772 |
| 3.41E-02            |                |        |        |        |        |        |
| ENSRNOG00000046443  | Mthfsd         | -0.049 | -0.265 |        | -0.645 |        |
| 0.202               |                |        |        |        |        |        |
| 0.483               |                |        |        |        |        |        |
| 3.42E-02            |                |        |        |        |        |        |
| ENSRNOG00000002669  | Cluh           | -0.311 | -0.144 | -0.526 |        | 0.082  |
| 0.437               |                |        |        |        |        |        |
| 3.43E-02            |                |        |        |        |        |        |
| ENSRNOG00000015242  | Fbxl8          | 0.133  | 0.340  | 0.568  | -0.455 | -0.625 |
| 3.43E-02            |                |        |        |        |        |        |
| ENSRNOG000000051619 | Asb2           | -0.099 | -0.261 | -1.377 |        | 0.268  |
| 0.892               |                |        |        |        |        |        |
| 3.44E-02            |                |        |        |        |        |        |
| ENSRNOG00000017321  | Trub1          | -0.149 | -0.136 | -0.444 |        | 0.139  |
| 0.376               |                |        |        |        |        |        |
| 3.45E-02            |                |        |        |        |        |        |
| ENSRNOG00000017416  | Ppic           | 0.216  | 0.183  | 1.044  | -0.394 | -0.845 |
| 3.45E-02            |                |        |        |        |        |        |
| ENSRNOG00000010096  | Azi2           | 0.087  | -0.110 | -0.229 | 0.135  | 0.209  |
| 3.45E-02            |                |        |        |        |        |        |
| ENSRNOG00000029172  | LOC100361944   | -0.027 | -0.303 |        | -0.721 |        |
| 0.336               |                |        |        |        |        |        |
| 0.507               |                |        |        |        |        |        |
| 3.45E-02            |                |        |        |        |        |        |
| ENSRNOG00000028711  | Dgat1          | -0.023 | -0.094 | -0.304 |        | 0.033  |
| 0.291               |                |        |        |        |        |        |
| 3.45E-02            |                |        |        |        |        |        |
| ENSRNOG00000056559  | AABR07034669.1 | -0.014 | 0.269  | 0.614  | -0.196 |        |
| -0.529              |                |        |        |        |        |        |
| 3.45E-02            |                |        |        |        |        |        |
| ENSRNOG00000020835  | Hipk4          | 0.068  | 0.228  | -0.429 | 0.013  | 0.686  |
| 3.45E-02            |                |        |        |        |        |        |
| ENSRNOG00000007869  | Wscd1          | -0.168 | -0.569 | -0.608 |        | 0.190  |
| 0.643               |                |        |        |        |        |        |
| 3.45E-02            |                |        |        |        |        |        |
| ENSRNOG00000002848  | Maoa           | -0.014 | -0.137 | -0.396 |        | 0.036  |
| 0.298               |                |        |        |        |        |        |
| 3.45E-02            |                |        |        |        |        |        |
| ENSRNOG00000003946  | Tor1aip1       | 0.190  | -0.013 | -0.315 |        | 0.061  |
| 0.293               |                |        |        |        |        |        |
| 3.45E-02            |                |        |        |        |        |        |
| ENSRNOG00000008673  | Arpc3          | -0.088 | 0.181  | 0.517  | -0.080 | -0.320 |
| 3.45E-02            |                |        |        |        |        |        |
| ENSRNOG00000020903  | Oraov1         | 0.447  | 0.347  | 0.241  | -0.662 | -0.436 |
| 3.45E-02            |                |        |        |        |        |        |
| ENSRNOG00000004273  | Ifitm1         | -0.160 | 0.435  | 1.678  | -0.357 | -      |
| 0.877               |                |        |        |        |        |        |
| 3.45E-02            |                |        |        |        |        |        |
| ENSRNOG00000009348  | Nos3           | -0.192 | -0.223 | -0.380 |        | 0.312  |
| 0.527               |                |        |        |        |        |        |
| 3.46E-02            |                |        |        |        |        |        |
| ENSRNOG00000003163  | Sdhc           | -0.188 | -0.267 | -0.638 |        | 0.204  |
| 0.464               |                |        |        |        |        |        |
| 3.46E-02            |                |        |        |        |        |        |
| ENSRNOG00000040273  | AABR07003017.1 | 0.196  | 0.080  | 0.529  | -0.184 | -      |
| 0.451               |                |        |        |        |        |        |
| 3.47E-02            |                |        |        |        |        |        |
| ENSRNOG00000052296  | Shank3         | -0.242 | -0.095 |        | -0.414 |        |
| 0.261               |                |        |        |        |        |        |
| 0.579               |                |        |        |        |        |        |
| 3.48E-02            |                |        |        |        |        |        |

|                                            |                 |        |        |        |        |        |
|--------------------------------------------|-----------------|--------|--------|--------|--------|--------|
| ENSRNOG00000047219<br>3.49E-02             | Ube3b           | 0.051  | -0.127 | -0.552 | 0.078  | 0.355  |
| ENSRNOG00000054854<br>3.49E-02             | AC110387.1      | 0.190  | 0.061  | 0.472  | -0.133 | -0.565 |
| ENSRNOG00000053061<br>0.325 3.51E-02       | Ubl4a           | -0.132 | -0.207 | -0.521 | 0.119  |        |
| ENSRNOG00000011253<br>0.270 1.109 3.51E-02 | RGD1304810      | -0.491 | -0.627 | -1.040 |        | -      |
| ENSRNOG00000005433<br>3.52E-02             | Shq1            | 0.276  | 0.497  | 0.815  | -0.691 | -0.713 |
| ENSRNOG00000012347<br>0.463 3.53E-02       | Gata2           | -0.079 | -0.214 | -0.276 | 0.299  |        |
| ENSRNOG00000008214<br>3.54E-02             | Fbxo9           | 0.014  | -0.126 | -0.407 | 0.061  | 0.291  |
| ENSRNOG00000015409<br>-0.370 3.54E-02      | LOC100911959    |        | -0.212 | 0.334  | 0.496  | -0.352 |
| ENSRNOG00000002273<br>3.54E-02             | Naaa            | -0.025 | 0.280  | 0.810  | -0.164 | -0.557 |
| ENSRNOG00000020339<br>0.508 3.54E-02       | Neur11          | 0.284  | -0.133 | -0.733 | 0.259  |        |
| ENSRNOG00000018650<br>3.54E-02             | Ap3m2           | 0.110  | 0.399  | 0.348  | -0.480 | -0.452 |
| ENSRNOG00000057991<br>3.002 3.56E-02       | 7SK             | -1.005 | -0.697 | -3.474 | 1.104  |        |
| ENSRNOG00000004823<br>3.56E-02             | Dock4           | 0.000  | -0.320 | -0.879 | 0.044  | 0.578  |
| ENSRNOG00000010091<br>0.286 3.56E-02       | Efcab14         | 0.149  | -0.149 | -0.443 | 0.040  |        |
| ENSRNOG00000024066<br>0.332 0.540 3.56E-02 | Fundc2          | -0.066 | -0.135 | -0.846 |        |        |
| ENSRNOG00000029535<br>3.56E-02             | Nrbp2           | -0.182 | 0.371  | 0.713  | -0.438 | -0.488 |
| ENSRNOG00000061379<br>3.57E-02             | C7              | 0.219  | 0.240  | 1.125  | -0.438 | -1.129 |
| ENSRNOG00000013867<br>1.189 3.57E-02       | Fgf1            | -1.284 | -0.446 | -0.578 | 0.344  |        |
| ENSRNOG00000023381<br>0.203 0.570 3.57E-02 | Proca1          | -0.437 | -0.226 | -0.463 |        |        |
| ENSRNOG00000047928<br>-1.229 3.57E-02      | AABR07048653.1  |        | -0.268 | 0.332  | 1.489  | -0.494 |
| ENSRNOG00000042962<br>0.392 3.58E-02       | Pdss2           | -0.261 | -0.225 | -0.476 | 0.131  |        |
| ENSRNOG00000039388<br>3.58E-02             | Prrt4           | -0.771 | 3.372  | 4.152  | -2.517 | -2.575 |
| ENSRNOG00000016827<br>0.298 0.506 3.58E-02 | Slc38a3         | -0.330 | -0.284 | -0.633 |        |        |
| ENSRNOG00000058987<br>3.58E-02             | Rn60_20_0049.10 | 0.111  | 0.030  | 1.134  | 0.013  | -1.292 |
| ENSRNOG00000049918<br>0.644 3.59E-02       | Lrg1            | -0.103 | -0.094 | -0.286 | 0.190  |        |
| ENSRNOG00000004234<br>3.60E-02             | Mgat2           | 0.085  | 0.102  | 0.550  | -0.070 | -0.352 |
| ENSRNOG00000015902<br>1.276 3.61E-02       | Cpxm2           | -0.283 | -0.351 | -0.612 | 0.272  |        |

|                     |                |          |          |        |        |        |          |
|---------------------|----------------|----------|----------|--------|--------|--------|----------|
| ENSRNOG00000007136  | Anxa7          | 0.158    | 0.279    | 0.621  | -0.215 | -0.427 |          |
| 3.61E-02            |                |          |          |        |        |        |          |
| ENSRNOG00000010655  | Mttp           | 0.011    | 0.247    | 0.590  | 0.006  | -0.812 | 3.61E-02 |
|                     |                |          |          |        |        |        |          |
| ENSRNOG000000061857 | Mgst2          | -0.167   |          | 1.217  | 2.202  | -1.052 | -1.327   |
| 3.61E-02            |                |          |          |        |        |        |          |
| ENSRNOG000000037871 | Sfxn5          | 0.113    | -0.391   |        | -1.563 | 0.310  | 0.879    |
| 3.62E-02            |                |          |          |        |        |        |          |
| ENSRNOG000000051615 | Hmgn2          | -0.324   |          | 0.286  | 0.753  | -0.190 | -0.513   |
| 3.62E-02            |                |          |          |        |        |        |          |
| ENSRNOG000000017523 | H6pd           | 0.112    | 0.447    | 0.629  | -0.447 |        | -0.473   |
| 3.62E-02            |                |          |          |        |        |        |          |
| ENSRNOG000000010910 | Gmeb1          | 0.039    | -0.022   |        | -0.130 | 0.065  | 0.232    |
| 3.62E-02            |                |          |          |        |        |        |          |
| ENSRNOG000000033615 | Mt-nd3         |          | -0.254   |        | -0.396 |        | -0.609   |
| 0.296               |                | 0.581    | 3.64E-02 |        |        |        |          |
| ENSRNOG000000037190 | Cd101          | -0.030   |          | 1.049  | 1.876  | -0.628 | -1.044   |
| 3.66E-02            |                |          |          |        |        |        |          |
| ENSRNOG000000019058 | Gstm3          | 0.037    | 1.959    | 2.272  | -1.693 |        | -1.755   |
| 3.66E-02            |                |          |          |        |        |        |          |
| ENSRNOG000000061046 | AABR07059632.3 |          | -0.009   |        | -0.158 |        | -0.306   |
| 0.199               |                | 0.314    | 3.66E-02 |        |        |        |          |
| ENSRNOG000000000456 | Psmb8          | 0.170    | 0.686    | 1.152  | -0.303 |        | -0.641   |
| 3.66E-02            |                |          |          |        |        |        |          |
| ENSRNOG000000016360 | Gps2           | 0.344    | -0.141   |        | -0.458 | 0.201  | 0.384    |
| 3.66E-02            |                |          |          |        |        |        |          |
| ENSRNOG000000012081 | Txn1           | 0.015    | 0.251    | 0.644  | -0.276 |        | -0.438   |
| 3.67E-02            |                |          |          |        |        |        |          |
| ENSRNOG000000001880 | Dgcr6          | 0.166    | -0.251   |        | -0.834 | 0.325  | 0.553    |
| 3.67E-02            |                |          |          |        |        |        |          |
| ENSRNOG000000011020 | Eif3l          | 0.006    | 0.125    | 0.351  | -0.100 |        | -0.249   |
| 3.67E-02            |                |          |          |        |        |        |          |
| ENSRNOG000000025075 | Relt           | -0.005   |          | 0.625  | 0.761  | -0.712 | -0.753   |
| 3.67E-02            |                |          |          |        |        |        |          |
| ENSRNOG000000027489 | Mn1            | 0.449    | -0.333   |        | -1.205 | 0.181  | 0.924    |
| 3.68E-02            |                |          |          |        |        |        |          |
| ENSRNOG000000024376 | Zfp111         |          | 0.076    | -0.163 |        | -0.400 | 0.258    |
| 0.299               |                | 3.69E-02 |          |        |        |        |          |
| ENSRNOG000000052725 | RGD1566029     |          | -0.147   |        | 0.240  | 0.758  | -0.641   |
| 1.084               |                | 3.70E-02 |          |        |        |        | -        |
| ENSRNOG000000051605 | SNORD86        |          | -0.393   |        | 0.256  | -0.389 | 0.211    |
| 1.402               |                | 3.70E-02 |          |        |        |        |          |
| ENSRNOG000000046918 | Apoo           | 0.076    | -0.341   |        | -0.772 | 0.211  | 0.467    |
| 3.70E-02            |                |          |          |        |        |        |          |
| ENSRNOG000000002194 | Coq2           | -0.006   |          | -0.150 |        | -0.493 | 0.176    |
| 0.383               |                | 3.70E-02 |          |        |        |        |          |
| ENSRNOG000000021660 | Nprl2          | 0.002    | -0.150   |        | -0.269 | 0.226  | 0.261    |
| 3.70E-02            |                |          |          |        |        |        |          |
| ENSRNOG000000020893 | Snx27          | -0.032   |          | -0.075 |        | -0.349 | 0.075    |
| 0.248               |                | 3.70E-02 |          |        |        |        |          |
| ENSRNOG000000006766 | Laptm4b        |          | -0.008   |        | 0.105  | 0.394  | -0.233   |
| 0.266               |                | 3.70E-02 |          |        |        |        | -        |
| ENSRNOG000000014369 | Slc27a4        | 0.006    | 0.267    | 0.363  | -0.302 |        | -0.349   |
| 3.70E-02            |                |          |          |        |        |        |          |

|                      |                |        |        |        |        |        |             |
|----------------------|----------------|--------|--------|--------|--------|--------|-------------|
| ENSRNOG00000010370   | Tnip1          | 0.004  | 0.296  | 0.400  | -0.153 | -0.358 |             |
| 3.70E-02             |                |        |        |        |        |        |             |
| ENSRNOG00000016587   | Ninj1          | -0.002 |        | 0.501  | 1.123  | -0.336 | -0.592      |
| 3.70E-02             |                |        |        |        |        |        |             |
| ENSRNOG00000025895   | Sdpr           | -0.190 |        | -0.420 |        | -0.403 | 0.407       |
| 0.521 3.71E-02       |                |        |        |        |        |        |             |
| ENSRNOG00000021123   | AC098622.1     | -0.173 |        | -0.331 |        | -0.772 |             |
| 0.346 0.625 3.72E-02 |                |        |        |        |        |        |             |
| ENSRNOG00000027894   | Iqgap3         |        | 0.342  | 0.785  | 1.231  | -0.626 | -0.996      |
| 3.72E-02             |                |        |        |        |        |        |             |
| ENSRNOG00000001161   | Gatc           | 0.090  | -0.205 |        | -0.476 |        | 0.158 0.329 |
| 3.72E-02             |                |        |        |        |        |        |             |
| ENSRNOG00000019842   | Artn           | 0.267  | 2.482  | 3.505  | -2.471 |        | -1.887      |
| 3.72E-02             |                |        |        |        |        |        |             |
| ENSRNOG00000046629   | Zfp37          | 0.581  | 0.337  | 0.875  | -0.541 |        | -1.404      |
| 3.73E-02             |                |        |        |        |        |        |             |
| ENSRNOG00000012378   | Dbn1           | -0.084 |        | 0.274  | 0.403  | -0.231 | -0.275      |
| 3.74E-02             |                |        |        |        |        |        |             |
| ENSRNOG00000026914   | Dnah1          | -0.559 |        | 0.737  | 1.587  | -0.263 | -1.376      |
| 3.74E-02             |                |        |        |        |        |        |             |
| ENSRNOG00000011949   | Ndufb5         |        | -0.217 |        | -0.345 |        | -0.630      |
| 0.269 0.525 3.75E-02 |                |        |        |        |        |        |             |
| ENSRNOG00000052734   | AABR07051310.1 |        | -0.490 |        | 0.263  | -0.902 |             |
| 0.259 1.922 3.76E-02 |                |        |        |        |        |        |             |
| ENSRNOG00000016362   | Gpr4           | -0.136 |        | -0.100 |        | -0.471 | 0.346       |
| 0.699 3.76E-02       |                |        |        |        |        |        |             |
| ENSRNOG00000008523   | Faf1           | 0.080  | -0.250 |        | -0.490 |        | 0.203 0.382 |
| 3.76E-02             |                |        |        |        |        |        |             |
| ENSRNOG00000013517   | Phtf2          | -0.259 |        | -0.331 |        | -0.428 | 0.156       |
| 0.424 3.76E-02       |                |        |        |        |        |        |             |
| ENSRNOG00000020251   | Art1           | 0.024  | -0.090 |        | -0.484 |        | 0.110 0.383 |
| 3.76E-02             |                |        |        |        |        |        |             |
| ENSRNOG00000026793   | Nt5dc3         |        | -0.044 |        | -0.114 |        | -0.684      |
| 0.009 0.608 3.76E-02 |                |        |        |        |        |        |             |
| ENSRNOG00000042320   | Slc41a1        |        | -0.300 |        | -0.132 |        | -0.287      |
| 0.271 0.382 3.76E-02 |                |        |        |        |        |        |             |
| ENSRNOG00000022274   | Slc2a8         |        | 0.215  | -0.093 |        | -0.528 | 0.197       |
| 0.349 3.77E-02       |                |        |        |        |        |        |             |
| ENSRNOG00000018148   | Cd99l2         |        | 0.179  | 0.581  | 0.998  | -0.499 | -0.991      |
| 3.78E-02             |                |        |        |        |        |        |             |
| ENSRNOG00000002338   | Dgke           | -0.052 |        | -0.281 |        | -0.553 | 0.205       |
| 0.503 3.78E-02       |                |        |        |        |        |        |             |
| ENSRNOG00000020905   | Hdac5          | -0.132 |        | -0.048 |        | -0.301 | 0.176       |
| 0.364 3.79E-02       |                |        |        |        |        |        |             |
| ENSRNOG00000028064   | Fhad1          | -0.214 |        | 1.543  | 3.873  | -2.562 | -2.925      |
| 3.80E-02             |                |        |        |        |        |        |             |
| ENSRNOG00000027456   | Cdc42bpg       |        | -0.122 |        | -0.077 |        | -0.217      |
| 0.237 0.518 3.80E-02 |                |        |        |        |        |        |             |
| ENSRNOG00000016631   | Zfp276         |        | -0.016 |        | 0.122  | -0.210 | 0.211       |
| 0.499 3.80E-02       |                |        |        |        |        |        |             |
| ENSRNOG00000019127   | Zfp606         |        | -0.136 |        | -0.320 |        | -0.597      |
| 0.308 0.445 3.80E-02 |                |        |        |        |        |        |             |
| ENSRNOG00000023152   | Tmem201        |        | 0.120  | -0.092 |        | -0.702 | 0.139       |
| 0.425 3.80E-02       |                |        |        |        |        |        |             |

|                                            |                |        |        |        |        |        |        |
|--------------------------------------------|----------------|--------|--------|--------|--------|--------|--------|
| ENSRNOG00000043141<br>3.80E-02             | Ap3s2          | 0.087  | 0.130  | 0.170  | -0.213 | -0.286 |        |
| ENSRNOG00000050547<br>0.325 3.80E-02       | Syngn2         |        | 0.192  | -0.083 |        | -0.575 | 0.144  |
| ENSRNOG00000021839<br>3.80E-02             | Cep126         |        | 0.182  | 0.167  | 0.943  | -0.602 | -1.113 |
| ENSRNOG00000016813<br>3.81E-02             | Tia1           | 0.018  | 0.180  | 0.252  | -0.119 | -0.283 |        |
| ENSRNOG00000017707<br>3.81E-02             | Abi2           | 0.084  | 0.023  | 0.183  | -0.233 | -0.411 |        |
| ENSRNOG00000015773<br>3.81E-02             | Il21r          | 0.083  | 0.707  | 1.737  | -0.243 | -1.044 |        |
| ENSRNOG00000002693<br>3.81E-02             | Nme1           | 0.016  | 0.140  | 0.448  | -0.139 | -0.478 |        |
| ENSRNOG00000054609<br>0.380 3.81E-02       | AABR07002683.1 |        | 0.094  | 0.117  | 0.368  | -0.243 | -      |
| ENSRNOG00000000302<br>3.82E-02             | Sesn1          | 0.104  | -0.220 |        | -0.608 | 0.219  | 0.371  |
| ENSRNOG00000046799<br>0.351 3.82E-02       | Phb            | -0.094 |        | -0.181 |        | -0.454 | 0.243  |
| ENSRNOG00000005486<br>0.128 0.519 3.84E-02 | AABR07058267.1 |        | 0.127  | -0.337 |        | -0.756 |        |
| ENSRNOG00000001169<br>0.439 3.85E-02       | Slc37a1        |        | 0.064  | -0.018 |        | -0.431 | 0.145  |
| ENSRNOG00000020908<br>3.85E-02             | LOC303566      |        | 0.368  | 0.985  | 1.115  | -1.362 | -1.368 |
| ENSRNOG00000030124<br>0.282 3.85E-02       | Ptpn11         |        | 0.146  | -0.114 |        | -0.518 | 0.036  |
| ENSRNOG00000007818<br>0.367 3.85E-02       | Slc45a4        |        | -0.066 |        | 0.367  | 0.199  | -0.450 |
| ENSRNOG00000012415<br>0.565 3.85E-02       | Mpc1           | -0.189 |        | -0.423 |        | -0.726 | 0.225  |
| ENSRNOG00000008061<br>3.86E-02             | Nuak1          | -0.250 |        | 0.105  | -0.082 | 0.130  | 0.410  |
| ENSRNOG00000014052<br>0.465 3.86E-02       | Ccna1          | -0.021 |        | -0.360 |        | -0.670 | 0.296  |
| ENSRNOG00000005447<br>-0.807 3.88E-02      | LOC100364791   |        |        | -0.202 |        | 0.488  | 0.725  |
| ENSRNOG00000051541<br>0.486 2.082 3.88E-02 | AC133316.1     |        | -0.742 |        | -0.288 | -2.164 |        |
| ENSRNOG00000027491<br>3.88E-02             | Vldlr          | 0.199  | -0.324 |        | -0.763 | 0.157  | 0.399  |
| ENSRNOG00000007172<br>0.123 0.300 3.88E-02 | Map4k3         |        | -0.031 |        | -0.014 | -0.246 |        |
| ENSRNOG00000032844<br>3.88E-02             | RT1-Da         |        | 0.311  | 0.664  | 0.976  | -0.646 | -0.821 |
| ENSRNOG00000052880<br>0.838 3.88E-02       | Prph           | -0.129 |        | -0.454 |        | -0.612 | 0.650  |
| ENSRNOG00000042848<br>0.397 3.88E-02       | Jam2           | -0.058 |        | -0.242 |        | -0.246 | 0.188  |
| ENSRNOG00000013875<br>0.061 0.287 3.88E-02 | Fbxl17         |        | -0.072 |        | -0.054 | -0.458 |        |
| ENSRNOG00000019073<br>3.88E-02             | Ikbkb          | -0.368 |        | 0.000  | -0.165 | 0.022  | 0.274  |

|                      |                |        |        |        |        |        |
|----------------------|----------------|--------|--------|--------|--------|--------|
| ENSRNOG00000009450   | Hcn4           | -1.965 | -0.978 | -1.400 | 1.131  |        |
| 1.867 3.89E-02       |                |        |        |        |        |        |
| ENSRNOG00000009323   | Fam214b        | -0.282 | 0.580  | 1.063  | -0.572 | -      |
| 0.677 3.89E-02       |                |        |        |        |        |        |
| ENSRNOG00000017102   | Cmtr2          | 0.037  | -0.150 | -0.435 | 0.012  | 0.416  |
| 3.91E-02             |                |        |        |        |        |        |
| ENSRNOG00000030127   | Eml2           | -0.175 | 0.372  | 0.455  | -0.316 | -0.334 |
| 3.91E-02             |                |        |        |        |        |        |
| ENSRNOG00000002917   | Sec14l5        | 0.323  | -0.678 | -2.008 | 0.374  |        |
| 1.340 3.92E-02       |                |        |        |        |        |        |
| ENSRNOG00000020451   | Cd81           | 0.124  | 0.093  | 0.228  | -0.114 | -0.265 |
| 3.93E-02             |                |        |        |        |        |        |
| ENSRNOG00000004312   | Tmbim4         | 0.134  | 0.081  | 0.315  | -0.062 | -0.317 |
| 3.94E-02             |                |        |        |        |        |        |
| ENSRNOG00000007799   | Fam151a        | -0.366 | -0.415 | -0.900 |        |        |
| 0.580 0.957 3.94E-02 |                |        |        |        |        |        |
| ENSRNOG00000048222   | Nlrc5          | -0.559 | 1.103  | 1.905  | -0.637 | -0.822 |
| 3.94E-02             |                |        |        |        |        |        |
| ENSRNOG00000010812   | Osbp16         | -0.001 | -0.258 | -0.904 |        |        |
| 0.217 0.568 3.95E-02 |                |        |        |        |        |        |
| ENSRNOG00000027115   | Zc2hc1c        | -0.209 | -0.312 | -0.731 |        |        |
| 0.240 0.780 3.96E-02 |                |        |        |        |        |        |
| ENSRNOG00000026880   | Usp38          | 0.055  | -0.170 | -0.572 | 0.111  | 0.391  |
| 3.97E-02             |                |        |        |        |        |        |
| ENSRNOG00000008159   | Msantd3        | 0.189  | -0.004 | 0.155  | -0.151 | -      |
| 0.294 3.97E-02       |                |        |        |        |        |        |
| ENSRNOG00000020590   | Adam15         | -0.051 | 0.065  | -0.016 | 0.082  |        |
| 0.425 3.97E-02       |                |        |        |        |        |        |
| ENSRNOG00000021085   | Sf1            | -0.068 | -0.013 | -0.174 | 0.117  |        |
| 0.256 3.98E-02       |                |        |        |        |        |        |
| ENSRNOG00000016033   | Endog          | -0.222 | -0.248 | -0.868 | 0.251  |        |
| 0.657 3.98E-02       |                |        |        |        |        |        |
| ENSRNOG00000029152   | Tmem69         | -0.084 | -0.252 | -0.371 |        |        |
| 0.103 0.337 3.98E-02 |                |        |        |        |        |        |
| ENSRNOG00000046028   | Haus6          | 0.036  | 0.411  | 0.909  | -0.522 | -0.631 |
| 3.98E-02             |                |        |        |        |        |        |
| ENSRNOG00000014946   | Thumpd1        | -0.141 | -0.144 | -0.183 |        |        |
| 0.083 0.247 3.98E-02 |                |        |        |        |        |        |
| ENSRNOG00000021004   | Rasip1         | -0.164 | -0.125 | -0.139 |        |        |
| 0.234 0.436 3.98E-02 |                |        |        |        |        |        |
| ENSRNOG00000017090   | RGD1308706     | 0.331  | -0.248 | -0.672 | 0.201  |        |
| 0.382 3.99E-02       |                |        |        |        |        |        |
| ENSRNOG00000010467   | Cpa5           | 0.925  | 0.352  | 0.771  | -1.652 | -2.128 |
| 3.99E-02             |                |        |        |        |        |        |
| ENSRNOG00000052533   | AABR07052521.1 | 0.187  | -0.413 | -1.002 |        |        |
| 0.473 1.493 3.99E-02 |                |        |        |        |        |        |
| ENSRNOG00000010204   | Tmem9          | -0.609 | 0.432  | 1.470  | -0.256 | -0.919 |
| 4.00E-02             |                |        |        |        |        |        |
| ENSRNOG00000010819   | Hspa41         | -0.269 | 0.143  | -0.118 | 0.601  |        |
| 0.862 4.02E-02       |                |        |        |        |        |        |
| ENSRNOG00000007129   | Cd8b           | -0.027 | 0.818  | 2.160  | -0.258 | -1.912 |
| 4.04E-02             |                |        |        |        |        |        |
| ENSRNOG00000012723   | Trim55         | 0.017  | 0.345  | 0.487  | -0.240 | -0.361 |
| 4.04E-02             |                |        |        |        |        |        |

|                                            |                |        |        |        |        |        |   |
|--------------------------------------------|----------------|--------|--------|--------|--------|--------|---|
| ENSRNOG00000015121<br>4.05E-02             | N4bp1          | 0.026  | -0.038 | -0.275 | 0.065  | 0.354  |   |
| ENSRNOG00000015118<br>0.350 4.05E-02       | Cpped1         | 0.034  | -0.128 | -0.653 | 0.103  |        |   |
| ENSRNOG00000023021<br>0.364 4.07E-02       | Msl2           | -0.022 | -0.149 | -0.402 | 0.134  |        |   |
| ENSRNOG00000047816<br>0.357 4.07E-02       | Ccs            | -0.123 | -0.103 | -0.403 | 0.287  |        |   |
| ENSRNOG00000014287<br>0.296 4.07E-02       | Stk11          | -0.108 | -0.128 | -0.312 | 0.191  |        |   |
| ENSRNOG00000020277<br>4.07E-02             | Cntnap1        | 0.025  | 0.328  | 0.437  | -0.377 | -0.647 |   |
| ENSRNOG00000018207<br>0.689 4.07E-02       | Dynlt1         | -0.051 | 0.348  | 1.052  | -0.383 |        | - |
| ENSRNOG00000036876<br>4.07E-02             | RGD1308923     | 0.022  | 0.521  | 0.960  | -0.436 | -0.697 |   |
| ENSRNOG00000003949<br>4.07E-02             | Phka2          | 0.458  | 0.417  | 1.114  | -0.693 | -1.518 |   |
| ENSRNOG00000012664<br>4.08E-02             | Polr1e         | 0.104  | 0.349  | 0.476  | -0.405 | -0.464 |   |
| ENSRNOG00000050318<br>4.08E-02             | Fsd1           | -0.360 | 1.008  | 1.795  | -1.315 | -1.097 |   |
| ENSRNOG00000013647<br>4.09E-02             | Polm           | 0.544  | -0.176 | -0.861 | 0.233  | 0.535  |   |
| ENSRNOG00000057837<br>0.260 0.887 4.09E-02 | AABR07017236.1 | 0.458  | -0.532 |        | -0.841 |        |   |
| ENSRNOG00000061786<br>0.438 0.700 4.09E-02 | Rn60_18_0774.1 | 0.293  | -0.303 |        | -0.935 |        |   |
| ENSRNOG00000028208<br>0.416 4.10E-02       | Mief2          | -0.301 | -0.205 | -0.575 | 0.141  |        |   |
| ENSRNOG00000032917<br>0.910 4.10E-02       | Zfand2a        | -0.025 | 0.935  | 1.537  | -0.806 |        | - |
| ENSRNOG00000024930<br>0.321 4.11E-02       | Smim19         | 0.192  | -0.353 | -0.514 | 0.307  |        |   |
| ENSRNOG00000042939<br>0.806 4.11E-02       | Nrip2          | -0.146 | 0.068  | -0.493 | -0.124 |        |   |
| ENSRNOG00000014330<br>4.11E-02             | Pcmt1          | 0.026  | -0.163 | -0.482 | 0.130  | 0.281  |   |
| ENSRNOG00000019100<br>4.11E-02             | Kif2c          | -0.261 | 0.025  | 1.399  | -0.206 | -1.613 |   |
| ENSRNOG00000020296<br>0.562 4.11E-02       | Usmg5          | -0.080 | -0.373 | -0.615 | 0.275  |        |   |
| ENSRNOG00000019659<br>0.842 4.12E-02       | Aspa           | -0.066 | -0.114 | 0.207  | -0.521 |        | - |
| ENSRNOG00000000588<br>0.603 4.12E-02       | Slc16a10       | 0.142  | -0.020 | -0.775 | 0.071  |        |   |
| ENSRNOG00000033719<br>0.646 4.12E-02       | Pcdhb12        | 0.118  | -0.118 | 0.066  | -0.449 |        | - |
| ENSRNOG00000001736<br>2.305 4.13E-02       | Bdh1           | -1.071 | -0.637 | -0.912 | 0.567  |        |   |
| ENSRNOG00000014461<br>4.13E-02             | Galns          | 0.175  | -0.011 | -0.775 | 0.186  | 0.550  |   |
| ENSRNOG00000003086<br>4.13E-02             | Cenpv          | 0.170  | -0.013 | -0.406 | 0.050  | 0.372  |   |



|                      |                |        |        |        |        |        |
|----------------------|----------------|--------|--------|--------|--------|--------|
| ENSRNOG00000009756   | Pacsin2        | -0.204 | -0.042 | -0.126 |        |        |
| 0.118 0.251 4.13E-02 |                |        |        |        |        |        |
| ENSRNOG00000017213   | Cdk11b         | 0.031  | -0.054 | -0.207 | 0.121  |        |
| 0.219 4.13E-02       |                |        |        |        |        |        |
| ENSRNOG00000002773   | Rgs4           | -0.132 | -0.324 | -0.658 | 0.411  |        |
| 0.638 4.13E-02       |                |        |        |        |        |        |
| ENSRNOG00000042503   | Ndufv2         | -0.099 | -0.333 | -0.653 |        |        |
| 0.252 0.478 4.13E-02 |                |        |        |        |        |        |
| ENSRNOG00000017506   | Cltb           | 0.140  | -0.004 | -0.478 | 0.155  | 0.387  |
| 4.13E-02             |                |        |        |        |        |        |
| ENSRNOG00000011189   | Acy1           | -0.050 | -0.079 | -0.238 | 0.186  |        |
| 0.361 4.13E-02       |                |        |        |        |        |        |
| ENSRNOG00000006399   | Synj2bp        | 0.021  | -0.281 | -0.538 | 0.148  |        |
| 0.327 4.13E-02       |                |        |        |        |        |        |
| ENSRNOG00000014637   | Atxn10         | -0.061 | 0.036  | 0.221  | -0.089 | -      |
| 0.241 4.13E-02       |                |        |        |        |        |        |
| ENSRNOG000000061348  | Fam53b         | -0.254 | 0.291  | 0.377  | -0.327 | -      |
| 0.354 4.13E-02       |                |        |        |        |        |        |
| ENSRNOG000000037331  | Cd33           | 0.091  | 0.549  | 1.259  | -0.314 | -0.830 |
| 4.13E-02             |                |        |        |        |        |        |
| ENSRNOG00000008431   | Gabbr2         | 0.146  | 0.520  | 1.114  | -0.665 | -0.977 |
| 4.13E-02             |                |        |        |        |        |        |
| ENSRNOG000000039110  | Lsmem1         | 0.273  | -0.359 | -0.987 | 0.264  |        |
| 0.600 4.14E-02       |                |        |        |        |        |        |
| ENSRNOG00000009549   | Fbxo3          | -0.059 | -0.219 | -0.412 | 0.097  |        |
| 0.324 4.15E-02       |                |        |        |        |        |        |
| ENSRNOG000000050042  | Myh8           | 0.292  | 0.611  | 0.920  | -0.670 | -1.096 |
| 4.16E-02             |                |        |        |        |        |        |
| ENSRNOG00000003150   | Mpc2           | -0.234 | -0.385 | -0.627 | 0.334  |        |
| 0.568 4.16E-02       |                |        |        |        |        |        |
| ENSRNOG00000004968   | Ncapg2         | 0.108  | 0.220  | 0.855  | -0.580 | -0.761 |
| 4.16E-02             |                |        |        |        |        |        |
| ENSRNOG000000038044  | Tsc22d2        | -0.001 | -0.094 | -0.520 |        |        |
| 0.080 0.393 4.17E-02 |                |        |        |        |        |        |
| ENSRNOG00000005012   | Utp14a         | -0.050 | 0.040  | 0.349  | -0.127 | -      |
| 0.305 4.18E-02       |                |        |        |        |        |        |
| ENSRNOG000000059350  | Ppp1r3a        | 0.192  | -0.348 | -0.920 | 0.171  |        |
| 0.641 4.19E-02       |                |        |        |        |        |        |
| ENSRNOG000000027574  | AABR07053879.1 | 0.335  | -0.173 | -1.187 |        |        |
| 0.105 1.151 4.20E-02 |                |        |        |        |        |        |
| ENSRNOG000000033906  | Zfp667         | 0.160  | -0.375 | -0.615 | 0.219  |        |
| 0.513 4.20E-02       |                |        |        |        |        |        |
| ENSRNOG00000014964   | Hp             | -0.365 | -0.262 | -0.539 | 0.322  |        |
| 0.852 4.20E-02       |                |        |        |        |        |        |
| ENSRNOG00000005667   | Astn1          | -0.169 | -0.314 | -0.453 | -0.028 |        |
| 0.727 4.20E-02       |                |        |        |        |        |        |
| ENSRNOG00000013747   | Sh3bp2         | -0.008 | 0.640  | 1.248  | -0.462 | -      |
| 0.744 4.20E-02       |                |        |        |        |        |        |
| ENSRNOG000000034038  | AABR07005844.1 | -0.271 | -0.312 | -0.470 |        |        |
| 0.167 0.936 4.20E-02 |                |        |        |        |        |        |
| ENSRNOG00000006832   | Zdhhc5         | 0.054  | -0.115 | -0.367 | 0.054  |        |
| 0.222 4.20E-02       |                |        |        |        |        |        |
| ENSRNOG00000014132   | Mypop          | 0.079  | -0.068 | -0.793 | 0.419  | 0.619  |
| 4.21E-02             |                |        |        |        |        |        |

|                                            |              |        |        |        |        |        |              |
|--------------------------------------------|--------------|--------|--------|--------|--------|--------|--------------|
| ENSRNOG00000049920<br>4.21E-02             | Psma2        | 0.047  | 0.071  | 0.319  | -0.153 | -0.315 |              |
| ENSRNOG00000011882<br>4.21E-02             | Gab2         | -0.019 |        | 0.250  | 0.523  | -0.536 | -0.477       |
| ENSRNOG00000001647<br>4.21E-02             | Ets2         | 0.624  | 0.645  | 0.719  | -0.551 | -0.632 |              |
| ENSRNOG00000021151<br>0.531 4.21E-02       | Ppp1r14b     | -0.109 |        | 0.358  | 0.547  | -0.230 | -            |
| ENSRNOG00000015701<br>0.429 4.22E-02       | Rreb1        | -0.144 |        | -0.066 |        | -0.476 | 0.035        |
| ENSRNOG00000003786<br>4.22E-02             | Tspan6       |        | 0.176  | -0.076 |        | 0.348  | 0.015 -0.333 |
| ENSRNOG00000002860<br>0.536 4.23E-02       | Ccdc181      |        | 0.203  | -0.324 |        | -0.812 | 0.305        |
| ENSRNOG00000000130<br>0.085 0.493 4.24E-02 | Dnajb5       |        | -0.198 |        | -0.116 | -0.535 |              |
| ENSRNOG00000003504<br>0.402 4.24E-02       | Rnaseh2a     |        | 0.013  | -0.184 |        | -0.469 | 0.287        |
| ENSRNOG00000008711<br>0.282 4.24E-02       | Med24        | -0.003 |        | -0.122 |        | -0.460 | 0.164        |
| ENSRNOG00000020039<br>1.494 4.25E-02       | Slc5a2       |        | -0.456 |        | 0.654  | 1.600  | -0.189 -     |
| ENSRNOG00000019693<br>0.330 4.25E-02       | Clpb         | -0.045 |        | -0.140 |        | -0.398 | 0.164        |
| ENSRNOG00000017311<br>0.512 4.26E-02       | Me3          | -0.130 |        | -0.203 |        | -0.706 | 0.195        |
| ENSRNOG00000005686<br>0.094 0.280 4.26E-02 | Suclg2       |        | -0.275 |        | -0.112 | -0.279 |              |
| ENSRNOG00000043167<br>4.26E-02             | Itga9        | -0.034 |        | 0.150  | 1.316  | -0.311 | -0.870       |
| ENSRNOG00000017074<br>4.26E-02             | Rab28        | 0.163  | -0.226 |        | -0.555 | 0.204  | 0.338        |
| ENSRNOG00000056964<br>0.320 4.26E-02       | LOC102549158 |        |        | 0.020  | 0.227  | 0.481  | -0.281 -     |
| ENSRNOG00000003669<br>0.918 4.26E-02       | Myocd        | -0.786 |        | -0.622 |        | -1.068 | 0.261        |
| ENSRNOG00000019473<br>0.295 0.867 4.26E-02 | Dcun1d2      |        | -0.075 |        | -0.060 | -0.872 |              |
| ENSRNOG00000011060<br>0.344 0.484 4.26E-02 | Unc119       |        | -0.283 |        | -0.249 | -0.606 |              |
| ENSRNOG00000009031<br>0.970 0.920 4.26E-02 | Gucy2c       |        | -0.403 |        | -0.720 | -1.585 |              |
| ENSRNOG00000009419<br>0.552 4.27E-02       | Ptprg        | -0.094 |        | -0.084 |        | -0.492 | 0.041        |
| ENSRNOG00000011026<br>0.121 0.469 4.27E-02 | Irf2bpl      |        | -0.163 |        | -0.141 | -0.555 |              |
| ENSRNOG00000048989<br>4.27E-02             | Larp7        | -0.102 |        | 0.048  | 0.199  | -0.158 | -0.323       |
| ENSRNOG00000007246<br>0.454 4.29E-02       | Atxn7        | -0.016 |        | -0.022 |        | -0.516 | -0.052       |
| ENSRNOG00000007628<br>0.437 4.29E-02       | Ptp4a3       |        | 0.183  | -0.153 |        | -0.434 | 0.322        |
| ENSRNOG00000009280<br>4.30E-02             | Mkrn1        | -0.094 |        | 0.100  | 0.232  | -0.192 | -0.310       |

|                     |                |          |        |        |        |        |  |
|---------------------|----------------|----------|--------|--------|--------|--------|--|
| ENSRNOG00000021149  | Ush1c          | 0.138    | -0.110 | -1.388 | 0.205  | 1.151  |  |
| 4.30E-02            |                |          |        |        |        |        |  |
| ENSRNOG00000058593  | Zbtb1          | -0.030   | 0.145  | 0.344  | -0.222 | -0.400 |  |
| 4.33E-02            |                |          |        |        |        |        |  |
| ENSRNOG00000014215  | Klf9           | 0.082    | -0.184 | -0.725 | 0.069  | 0.575  |  |
| 4.33E-02            |                |          |        |        |        |        |  |
| ENSRNOG00000052539  | Prpf40b        | -0.106   | -0.061 | -0.357 |        |        |  |
| 0.108               | 0.291          | 4.33E-02 |        |        |        |        |  |
| ENSRNOG00000010975  | Adnp           | -0.096   | -0.108 | -0.262 | 0.078  |        |  |
| 0.272               | 4.34E-02       |          |        |        |        |        |  |
| ENSRNOG00000017693  | Slc2a5         | -0.282   | 0.197  | -0.070 | 0.366  |        |  |
| 0.940               | 4.34E-02       |          |        |        |        |        |  |
| ENSRNOG00000001603  | N6amt1         | -0.070   | -0.251 | -0.576 |        |        |  |
| 0.256               | 0.363          | 4.34E-02 |        |        |        |        |  |
| ENSRNOG000000061108 | Arcn1          | 0.073    | -0.113 | -0.164 | 0.100  | 0.191  |  |
| 4.34E-02            |                |          |        |        |        |        |  |
| ENSRNOG000000018865 | Adamts12       | 0.147    | -0.002 | 0.478  | -0.271 | -      |  |
| 0.642               | 4.34E-02       |          |        |        |        |        |  |
| ENSRNOG000000057659 | AABR07067080.1 | 0.090    | -0.143 | -1.218 |        |        |  |
| 0.160               | 0.932          | 4.37E-02 |        |        |        |        |  |
| ENSRNOG000000028330 | AABR07067600.1 | 0.114    | -0.161 | -0.355 |        |        |  |
| 0.020               | 0.348          | 4.37E-02 |        |        |        |        |  |
| ENSRNOG000000001711 | Hrasls         | 0.070    | -0.497 | -0.765 | 0.310  |        |  |
| 0.320               | 4.37E-02       |          |        |        |        |        |  |
| ENSRNOG000000000457 | Tap1           | -0.068   | 0.575  | 1.055  | -0.281 | -0.511 |  |
| 4.37E-02            |                |          |        |        |        |        |  |
| ENSRNOG000000002343 | Uchl1          | -0.509   | 1.369  | 2.775  | -1.532 | -1.714 |  |
| 4.37E-02            |                |          |        |        |        |        |  |
| ENSRNOG000000011847 | Grk4           | -0.015   | -0.337 | -0.424 | 0.539  |        |  |
| 0.398               | 4.37E-02       |          |        |        |        |        |  |
| ENSRNOG000000009686 | Aqp7           | -1.910   | -1.044 | -0.421 | 1.360  |        |  |
| 1.722               | 4.38E-02       |          |        |        |        |        |  |
| ENSRNOG000000034078 | Mxi1           | 0.266    | -0.160 | -0.426 | 0.262  | 0.338  |  |
| 4.38E-02            |                |          |        |        |        |        |  |
| ENSRNOG000000050067 | LOC100364509   | 0.023    | 0.015  | 0.379  | 0.057  | -0.341 |  |
| 4.38E-02            |                |          |        |        |        |        |  |
| ENSRNOG000000013583 | Tbc1d8         | 0.052    | 0.378  | 0.453  | -0.207 | -0.386 |  |
| 4.38E-02            |                |          |        |        |        |        |  |
| ENSRNOG000000053850 | Rdh5           | -0.382   | 0.608  | 1.704  | -0.449 | -1.410 |  |
| 4.38E-02            |                |          |        |        |        |        |  |
| ENSRNOG000000001628 | Pcp4           | -0.203   | 1.419  | 3.210  | -1.481 | -2.476 |  |
| 4.38E-02            |                |          |        |        |        |        |  |
| ENSRNOG000000015813 | Ubr2           | -0.012   | -0.187 | -0.565 | 0.132  |        |  |
| 0.409               | 4.38E-02       |          |        |        |        |        |  |
| ENSRNOG000000000576 | Anapc16        | 0.264    | -0.104 | -0.765 | 0.129  |        |  |
| 0.461               | 4.39E-02       |          |        |        |        |        |  |
| ENSRNOG000000020460 | Banf1          | 0.164    | -0.340 | -0.641 | 0.287  | 0.384  |  |
| 4.39E-02            |                |          |        |        |        |        |  |
| ENSRNOG000000049511 | Safb2          | -0.079   | -0.126 | -0.335 | 0.154  |        |  |
| 0.286               | 4.39E-02       |          |        |        |        |        |  |
| ENSRNOG000000007971 | Wbp2           | 0.032    | -0.032 | -0.294 | 0.132  | 0.242  |  |
| 4.41E-02            |                |          |        |        |        |        |  |
| ENSRNOG000000047783 | Tmem200a       | -0.382   | 0.673  | 2.311  | -1.576 | -      |  |
| 2.152               | 4.41E-02       |          |        |        |        |        |  |

|                    |                |          |        |        |        |        |
|--------------------|----------------|----------|--------|--------|--------|--------|
| ENSRNOG00000013358 | Aqp11          | -0.002   | 0.525  | 1.126  | -0.654 | -1.319 |
| 4.42E-02           |                |          |        |        |        |        |
| ENSRNOG00000001706 | Kalrn          | 0.067    | -0.385 | -0.830 | 0.379  | 0.562  |
| 4.42E-02           |                |          |        |        |        |        |
| ENSRNOG00000007578 | Zfp830         | -0.094   | -0.219 | -0.366 |        |        |
| 0.164              | 0.316          | 4.42E-02 |        |        |        |        |
| ENSRNOG00000028752 | Tmem81         | 0.027    | -0.317 | -0.444 | -0.170 |        |
| 0.719              | 4.42E-02       |          |        |        |        |        |
| ENSRNOG00000042533 | Accs1          | -0.832   | -0.803 | -0.737 | 0.720  |        |
| 1.311              | 4.43E-02       |          |        |        |        |        |
| ENSRNOG00000018159 | Anxa4          | 0.206    | 0.245  | 0.471  | -0.172 | -0.334 |
| 4.43E-02           |                |          |        |        |        |        |
| ENSRNOG00000003717 | Cnih4          | 0.125    | -0.066 | 0.200  | -0.049 | -0.290 |
| 4.43E-02           |                |          |        |        |        |        |
| ENSRNOG00000000306 | Smpd2          | 0.112    | 0.138  | 0.319  | -0.260 | -0.351 |
| 4.43E-02           |                |          |        |        |        |        |
| ENSRNOG00000011936 | Abhd14a        | -0.062   | -0.209 | -0.460 |        |        |
| 0.289              | 0.406          | 4.43E-02 |        |        |        |        |
| ENSRNOG00000007827 | Cox4i2         | -0.133   | -0.284 | -0.515 |        |        |
| 0.171              | 0.617          | 4.43E-02 |        |        |        |        |
| ENSRNOG00000031269 | RGD1304694     | 0.042    | 0.083  | -0.100 | -0.007 |        |
| 0.229              | 4.44E-02       |          |        |        |        |        |
| ENSRNOG00000012473 | Cflar          | 0.004    | -0.015 | -0.274 | 0.061  | 0.335  |
| 4.44E-02           |                |          |        |        |        |        |
| ENSRNOG00000049537 | Rn60_13_0828.1 | 0.190    | 0.120  | 0.428  | -0.145 | -      |
| 0.340              | 4.44E-02       |          |        |        |        |        |
| ENSRNOG00000010208 | Timp1          | 0.193    | 0.629  | 1.549  | -0.958 | -1.013 |
| 4.46E-02           |                |          |        |        |        |        |
| ENSRNOG00000013461 | Ralbp1         | 0.152    | -0.129 | -0.354 | 0.159  |        |
| 0.224              | 4.46E-02       |          |        |        |        |        |
| ENSRNOG00000000571 | Psap           | 0.126    | -0.015 | -0.404 | 0.051  | 0.301  |
| 4.46E-02           |                |          |        |        |        |        |
| ENSRNOG00000018809 | Psm5           | -0.057   | 0.312  | 0.635  | -0.335 | -0.391 |
| 4.47E-02           |                |          |        |        |        |        |
| ENSRNOG00000011863 | Gins3          | 0.065    | 0.210  | 1.032  | -0.328 | -1.097 |
| 4.47E-02           |                |          |        |        |        |        |
| ENSRNOG00000036672 | Sectm1a        | 0.279    | 1.762  | 2.922  | -1.359 | -1.649 |
| 4.50E-02           |                |          |        |        |        |        |
| ENSRNOG00000016544 | Arhgef28       | -0.028   | 0.024  | -0.270 | 0.084  |        |
| 0.498              | 4.50E-02       |          |        |        |        |        |
| ENSRNOG00000008934 | Tmem65         | -0.301   | -0.339 | -0.664 |        |        |
| 0.257              | 0.657          | 4.51E-02 |        |        |        |        |
| ENSRNOG00000013683 | Slpr1          | 0.028    | -0.341 | -0.594 | 0.266  | 0.527  |
| 4.51E-02           |                |          |        |        |        |        |
| ENSRNOG00000007351 | Ggh            | -0.019   | -0.288 | 0.195  | 0.082  | -0.579 |
| 4.51E-02           |                |          |        |        |        |        |
| ENSRNOG00000052298 | AABR07014974.1 | -0.199   | -0.223 | -0.712 |        |        |
| 0.184              | 0.771          | 4.51E-02 |        |        |        |        |
| ENSRNOG00000010213 | Fgd5           | -0.180   | -0.177 | -0.335 | 0.271  |        |
| 0.441              | 4.51E-02       |          |        |        |        |        |
| ENSRNOG00000002055 | Noa1           | -0.021   | -0.159 | -0.388 | 0.131  |        |
| 0.329              | 4.51E-02       |          |        |        |        |        |
| ENSRNOG00000014209 | Utp6           | 0.099    | 0.087  | 0.173  | -0.168 | -0.266 |
| 4.51E-02           |                |          |        |        |        |        |

|                     |              |        |        |        |        |        |        |
|---------------------|--------------|--------|--------|--------|--------|--------|--------|
| ENSRNOG00000008424  | Aagab        | 0.110  | 0.280  | 0.238  | -0.389 | -0.312 |        |
| 4.51E-02            |              |        |        |        |        |        |        |
| ENSRNOG00000017003  | Plxna1       |        | -0.055 | 0.243  | 0.494  | -0.206 | -      |
| 0.409               |              |        |        |        |        |        |        |
| 4.51E-02            |              |        |        |        |        |        |        |
| ENSRNOG00000016561  | Ns5atp9      | 0.366  | 0.261  | 1.627  | -1.279 | -1.919 |        |
| 4.51E-02            |              |        |        |        |        |        |        |
| ENSRNOG00000014117  | Hmox1        | 0.043  | 0.912  | 1.545  | -0.998 | -0.889 |        |
| 4.51E-02            |              |        |        |        |        |        |        |
| ENSRNOG00000001047  | Map2k7       |        | -0.001 | -0.053 |        | -0.407 |        |
| 0.083               |              |        |        |        |        |        |        |
| 0.286               |              |        |        |        |        |        |        |
| 4.52E-02            |              |        |        |        |        |        |        |
| ENSRNOG00000003600  | Pnpt1        | -0.119 |        | -0.260 | -0.302 | 0.133  |        |
| 0.316               |              |        |        |        |        |        |        |
| 4.53E-02            |              |        |        |        |        |        |        |
| ENSRNOG00000015188  | LOC100909998 |        | 0.009  | -0.228 |        | -0.661 |        |
| 0.376               |              |        |        |        |        |        |        |
| 0.649               |              |        |        |        |        |        |        |
| 4.53E-02            |              |        |        |        |        |        |        |
| ENSRNOG00000019511  | Mrps18a      |        | -0.040 | -0.151 |        | -0.417 |        |
| 0.196               |              |        |        |        |        |        |        |
| 0.346               |              |        |        |        |        |        |        |
| 4.54E-02            |              |        |        |        |        |        |        |
| ENSRNOG000000061358 | AC129365.1   | 0.053  | -0.149 |        | 0.452  | 0.149  | -0.501 |
| 4.55E-02            |              |        |        |        |        |        |        |
| ENSRNOG00000018760  | Mpp7         | -0.469 |        | -1.100 | -1.153 | 0.762  |        |
| 1.251               |              |        |        |        |        |        |        |
| 4.55E-02            |              |        |        |        |        |        |        |
| ENSRNOG00000022060  | Magi1        | -0.518 |        | -0.012 | -0.363 | 0.126  |        |
| 0.439               |              |        |        |        |        |        |        |
| 4.55E-02            |              |        |        |        |        |        |        |
| ENSRNOG00000001514  | Cdca7        | 0.268  | 0.259  | 0.995  | -0.243 | -1.145 |        |
| 4.55E-02            |              |        |        |        |        |        |        |
| ENSRNOG00000017869  | Irf8         | -0.399 |        | 0.771  | 1.627  | -0.237 | -0.772 |
| 4.55E-02            |              |        |        |        |        |        |        |
| ENSRNOG00000017502  | Sike1        | 0.163  | -0.083 |        | 0.085  | -0.112 | -0.279 |
| 4.56E-02            |              |        |        |        |        |        |        |
| ENSRNOG00000002710  | Cnst         | 0.223  | -0.071 |        | -1.088 | 0.185  | 0.634  |
| 4.57E-02            |              |        |        |        |        |        |        |
| ENSRNOG00000018349  | Polr1b       |        | 0.065  | -0.143 |        | -0.378 | 0.069  |
| 0.364               |              |        |        |        |        |        |        |
| 4.57E-02            |              |        |        |        |        |        |        |
| ENSRNOG00000007710  | Usp20        | -0.318 |        | 0.342  | 0.692  | -0.309 | -0.445 |
| 4.58E-02            |              |        |        |        |        |        |        |
| ENSRNOG00000019996  | Slc16a1      |        | -0.410 |        | -0.445 | -0.668 |        |
| 0.320               |              |        |        |        |        |        |        |
| 0.762               |              |        |        |        |        |        |        |
| 4.58E-02            |              |        |        |        |        |        |        |
| ENSRNOG00000011140  | Fam213a      |        | -0.416 |        | -0.097 | -0.399 |        |
| 0.231               |              |        |        |        |        |        |        |
| 0.843               |              |        |        |        |        |        |        |
| 4.58E-02            |              |        |        |        |        |        |        |
| ENSRNOG00000021954  | Spg11        | -0.036 |        | -0.070 |        | -0.406 | 0.163  |
| 0.338               |              |        |        |        |        |        |        |
| 4.59E-02            |              |        |        |        |        |        |        |
| ENSRNOG000000056246 | Gls          | -0.010 |        | -0.197 |        | -0.354 | 0.097  |
| 0.288               |              |        |        |        |        |        |        |
| 4.59E-02            |              |        |        |        |        |        |        |
| ENSRNOG00000009029  | Nptn         | 0.054  | -0.118 |        | -0.382 | 0.052  | 0.220  |
| 4.59E-02            |              |        |        |        |        |        |        |
| ENSRNOG000000042960 | Rgcc         | -0.279 |        | 0.220  | 1.440  | -0.314 | -1.114 |
| 4.59E-02            |              |        |        |        |        |        |        |
| ENSRNOG00000003846  | Pitpna       |        | 0.098  | 0.065  | 0.117  | -0.153 | -0.238 |
| 4.59E-02            |              |        |        |        |        |        |        |
| ENSRNOG00000024503  | Nbas         | 0.000  | -0.046 |        | -0.402 | -0.013 |        |
| 0.302               |              |        |        |        |        |        |        |
| 4.59E-02            |              |        |        |        |        |        |        |
| ENSRNOG00000016494  | Tmem204      |        | -0.110 |        | -0.177 | -0.327 |        |
| 0.259               |              |        |        |        |        |        |        |
| 0.471               |              |        |        |        |        |        |        |
| 4.60E-02            |              |        |        |        |        |        |        |
| ENSRNOG00000015972  | Ano5         | 0.160  | -0.299 |        | -1.092 | 0.093  | 0.696  |
| 4.60E-02            |              |        |        |        |        |        |        |

|                     |                |          |        |        |        |        |
|---------------------|----------------|----------|--------|--------|--------|--------|
| ENSRNOG00000014104  | Myo5b          | -0.378   | 1.759  | 4.398  | -1.431 | -2.350 |
| 4.60E-02            |                |          |        |        |        |        |
| ENSRNOG00000013586  | Snai3          | -0.370   | -1.177 |        | -0.909 | 0.887  |
| 1.061               | 4.62E-02       |          |        |        |        |        |
| ENSRNOG00000015735  | Zswim1         | 0.061    | -0.196 |        | -0.548 | 0.228  |
| 0.438               | 4.63E-02       |          |        |        |        |        |
| ENSRNOG00000004459  | Sdr9c7         | -0.978   | 2.582  | 4.413  | -2.514 | -      |
| 3.117               | 4.64E-02       |          |        |        |        |        |
| ENSRNOG00000012386  | Zbtb38         | 0.274    | 0.018  | -0.701 |        | -0.086 |
| 0.477               | 4.65E-02       |          |        |        |        |        |
| ENSRNOG000000054391 | Snurf          | -0.001   | -0.321 |        | -1.638 | 0.375  |
| 1.494               | 4.65E-02       |          |        |        |        |        |
| ENSRNOG000000021143 | Setdb1         | -0.027   | 0.136  | 0.193  | -0.098 | -      |
| 0.223               | 4.65E-02       |          |        |        |        |        |
| ENSRNOG000000012134 | Scn4a          | 0.203    | -0.081 |        | -0.818 | 0.034  |
| 4.66E-02            |                |          |        |        |        | 0.541  |
| ENSRNOG000000037638 | Timm50         | -0.118   |        | -0.103 |        | -0.334 |
| 0.124               | 0.275          | 4.66E-02 |        |        |        |        |
| ENSRNOG000000003229 | Tspan7         | 0.201    | -0.003 |        | 0.182  | -0.120 |
| 0.289               | 4.66E-02       |          |        |        |        | -      |
| ENSRNOG000000003931 | Arsg           | -0.015   | 0.270  | 0.374  | -0.278 | -0.331 |
| 4.66E-02            |                |          |        |        |        |        |
| ENSRNOG000000047984 | Mrps22         | -0.069   |        | -0.188 |        | -0.412 |
| 0.155               | 0.301          | 4.67E-02 |        |        |        |        |
| ENSRNOG000000046479 | Chaf1a         | 0.024    | 0.146  | 0.363  | -0.274 | -0.461 |
| 4.67E-02            |                |          |        |        |        |        |
| ENSRNOG000000056941 | AABR07066529.3 |          | -0.725 |        | -0.385 | -0.444 |
| 0.140               | 0.874          | 4.67E-02 |        |        |        |        |
| ENSRNOG000000027049 | Atp5j2         | 0.000    | -0.322 |        | -0.567 | 0.237  |
| 0.435               | 4.67E-02       |          |        |        |        |        |
| ENSRNOG000000033663 | P4ha2          | 0.187    | -0.285 |        | -0.495 | 0.317  |
| 4.67E-02            |                |          |        |        |        | 0.396  |
| ENSRNOG000000019840 | Mdp1           | -0.055   |        | -0.326 |        | -0.518 |
| 0.396               | 4.67E-02       |          |        |        |        | 0.265  |
| ENSRNOG000000013598 | Melk           | 0.132    | 0.625  | 2.352  | -1.220 | -1.602 |
| 4.68E-02            |                |          |        |        |        |        |
| ENSRNOG000000010361 | Kif3b          | -0.027   |        | 0.206  | 0.269  | -0.296 |
| 4.69E-02            |                |          |        |        |        | -0.308 |
| ENSRNOG000000003280 | Grin2c         |          | -0.058 |        | 1.481  | 2.663  |
| 1.931               | 4.69E-02       |          |        |        |        | -2.045 |
| ENSRNOG000000023668 | Scyl1          | 0.090    | -0.087 |        | -0.382 | 0.148  |
| 4.69E-02            |                |          |        |        |        | 0.263  |
| ENSRNOG000000027799 | Tmie           | 0.083    | -0.188 |        | -0.494 | 0.072  |
| 4.70E-02            |                |          |        |        |        | 0.610  |
| ENSRNOG000000048193 | Hnrnph3        |          | -0.143 |        | -0.007 |        |
| 0.059               | 0.436          | 4.70E-02 |        |        |        | -0.283 |
| ENSRNOG000000007442 | Ubl7           | 0.076    | -0.051 |        | -0.352 | 0.133  |
| 4.70E-02            |                |          |        |        |        | 0.259  |
| ENSRNOG000000011134 | Lama2          | -0.049   |        | 0.037  | 0.333  | -0.353 |
| 4.70E-02            |                |          |        |        |        | -0.535 |
| ENSRNOG000000002423 | Fam114a2       | 0.064    | -0.125 |        | -0.303 | 0.068  |
| 0.200               | 4.70E-02       |          |        |        |        |        |
| ENSRNOG000000027503 | Rps25          | 0.199    | 0.031  | 0.421  | -0.053 | -0.445 |
| 4.70E-02            |                |          |        |        |        |        |

|                    |                |          |          |        |        |        |
|--------------------|----------------|----------|----------|--------|--------|--------|
| ENSRNOG00000017392 | Fgf2           | 0.270    | -0.153   | -0.915 | -0.059 |        |
| 0.804              |                | 4.70E-02 |          |        |        |        |
| ENSRNOG00000008062 | Dqx1           | -0.211   | -0.289   | -0.392 | 0.196  |        |
| 0.559              |                | 4.70E-02 |          |        |        |        |
| ENSRNOG00000020848 | Adck4          | -0.155   | 0.352    | 0.584  | -0.266 | -0.403 |
| 4.70E-02           |                |          |          |        |        |        |
| ENSRNOG00000017206 | Igfbp5         | -0.149   | 0.626    | 0.955  | -0.415 | -      |
| 0.632              |                | 4.70E-02 |          |        |        |        |
| ENSRNOG00000049105 | AC095947.2     | 0.147    | 0.148    | 0.509  | -0.061 | -0.449 |
| 4.70E-02           |                |          |          |        |        |        |
| ENSRNOG00000010239 | Cnbp           | -0.073   | -0.201   | -0.387 | 0.113  |        |
| 0.274              |                | 4.71E-02 |          |        |        |        |
| ENSRNOG00000014190 | Hint3          | 0.057    | -0.288   | -0.584 | 0.242  | 0.366  |
| 4.72E-02           |                |          |          |        |        |        |
| ENSRNOG00000008807 | Rp1            | -2.068   | -1.454   | -1.419 | 1.725  |        |
| 2.664              |                | 4.72E-02 |          |        |        |        |
| ENSRNOG00000019811 | LOC100362432   | 0.129    | -0.284   | -0.669 |        |        |
| 0.248              |                | 0.389    | 4.72E-02 |        |        |        |
| ENSRNOG00000017133 | LOC306766      | 0.014    | -0.136   | -0.460 | 0.075  |        |
| 0.310              |                | 4.72E-02 |          |        |        |        |
| ENSRNOG00000016321 | Entpd4         | 0.092    | 0.065    | 0.075  | -0.159 | -0.270 |
| 4.72E-02           |                |          |          |        |        |        |
| ENSRNOG00000002353 | Rab3gap2       | -0.075   | 0.259    | 0.385  | -0.290 | -      |
| 0.300              |                | 4.72E-02 |          |        |        |        |
| ENSRNOG00000023269 | AABR07021759.1 | 0.194    | -0.010   | 0.182  | -0.082 |        |
| -0.327             |                | 4.72E-02 |          |        |        |        |
| ENSRNOG00000010950 | Cep41          | 0.205    | 0.085    | 0.414  | -0.370 | -0.634 |
| 4.72E-02           |                |          |          |        |        |        |
| ENSRNOG00000015278 | Myl12a         | -0.541   | 0.401    | 1.239  | -0.462 | -      |
| 0.781              |                | 4.72E-02 |          |        |        |        |
| ENSRNOG00000045888 | AABR07030798.1 | 0.751    | 0.780    | 1.207  | -0.470 | -      |
| 1.339              |                | 4.72E-02 |          |        |        |        |
| ENSRNOG00000016957 | Igfbp2         | 0.412    | 1.735    | 2.177  | -1.036 | -2.111 |
| 4.72E-02           |                |          |          |        |        |        |
| ENSRNOG00000020384 | Fam13b         | -0.037   | 0.207    | 0.364  | -0.279 | -      |
| 0.318              |                | 4.72E-02 |          |        |        |        |
| ENSRNOG00000020689 | Cpeb3          | -0.022   | -0.018   | -0.681 | -0.048 |        |
| 0.493              |                | 4.73E-02 |          |        |        |        |
| ENSRNOG00000011853 | Mbd2           | 0.176    | -0.219   | -0.477 | 0.184  | 0.304  |
| 4.73E-02           |                |          |          |        |        |        |
| ENSRNOG00000043503 | Ehd1           | -0.013   | -0.105   | -0.377 | 0.121  |        |
| 0.275              |                | 4.73E-02 |          |        |        |        |
| ENSRNOG00000042576 | Tcp1111        | -0.027   | 0.995    | 1.364  | -0.939 | -      |
| 0.776              |                | 4.73E-02 |          |        |        |        |
| ENSRNOG00000032339 | Ras112         | -0.272   | -0.244   | -0.428 |        |        |
| 0.418              |                | 0.495    | 4.73E-02 |        |        |        |
| ENSRNOG00000024197 | AABR07049149.1 | 0.190    | 0.093    | 0.358  | -0.172 | -      |
| 0.563              |                | 4.74E-02 |          |        |        |        |
| ENSRNOG00000054049 | Preli2         | -0.503   | 0.372    | 1.245  | -0.141 | -      |
| 0.692              |                | 4.74E-02 |          |        |        |        |
| ENSRNOG00000039985 | Ube2a          | -0.043   | -0.152   | -0.364 | 0.160  |        |
| 0.258              |                | 4.75E-02 |          |        |        |        |
| ENSRNOG00000017466 | Kif5b          | 0.066    | 0.268    | 0.274  | -0.341 | -0.367 |
| 4.75E-02           |                |          |          |        |        |        |

|                     |                |          |        |        |        |        |
|---------------------|----------------|----------|--------|--------|--------|--------|
| ENSRNOG00000005043  | Cpeb2          | 0.120    | -0.193 | -0.903 | 0.056  | 0.587  |
| 4.76E-02            |                |          |        |        |        |        |
| ENSRNOG00000012264  | Alkbh1         |          | -0.077 | -0.095 | -0.212 |        |
| 0.016               | 0.263          | 4.80E-02 |        |        |        |        |
| ENSRNOG000000054360 | Tspan11        | 0.102    | 0.229  | 0.502  | -0.362 | -0.560 |
| 4.80E-02            |                |          |        |        |        |        |
| ENSRNOG00000012808  | Tmem259        | -0.019   | -0.057 | -0.309 |        |        |
| 0.129               | 0.286          | 4.80E-02 |        |        |        |        |
| ENSRNOG00000010064  | Abcc4          | 0.189    | -0.143 | -0.828 | 0.061  | 0.559  |
| 4.82E-02            |                |          |        |        |        |        |
| ENSRNOG00000002839  | Slc19a2        | -0.417   | 0.098  | 0.165  | -0.001 |        |
| 0.511               | 4.83E-02       |          |        |        |        |        |
| ENSRNOG000000021812 | Scx            | 0.506    | 0.179  | 0.439  | -0.194 | -0.662 |
| 4.83E-02            |                |          |        |        |        |        |
| ENSRNOG00000016443  | Vps13d         | 0.061    | -0.146 | -0.700 | 0.042  |        |
| 0.492               | 4.83E-02       |          |        |        |        |        |
| ENSRNOG00000017962  | Serpinb6       | 0.010    | 0.158  | 0.488  | -0.163 | -0.357 |
| 4.85E-02            |                |          |        |        |        |        |
| ENSRNOG00000002695  | Tfb2m          | -0.042   | -0.310 | -0.413 | 0.239  |        |
| 0.395               | 4.86E-02       |          |        |        |        |        |
| ENSRNOG000000028415 | Cdc20          | 0.205    | 0.266  | 0.649  | -0.367 | -0.760 |
| 4.86E-02            |                |          |        |        |        |        |
| ENSRNOG000000060988 | Kcnc4          | 0.605    | 0.292  | 0.003  | -0.499 | -0.634 |
| 4.86E-02            |                |          |        |        |        |        |
| ENSRNOG00000003076  | Rbms2          | -0.053   | -0.010 | -0.071 | 0.046  |        |
| 0.286               | 4.87E-02       |          |        |        |        |        |
| ENSRNOG00000009974  | Coq3           | -0.214   | -0.437 | -0.597 | 0.245  |        |
| 0.495               | 4.87E-02       |          |        |        |        |        |
| ENSRNOG00000019760  | Oxnad1         | -0.318   | -0.308 | -0.435 |        |        |
| 0.243               | 0.445          | 4.90E-02 |        |        |        |        |
| ENSRNOG00000010609  | Abcf2          | 0.131    | -0.056 | -0.379 | 0.079  | 0.274  |
| 4.90E-02            |                |          |        |        |        |        |
| ENSRNOG00000002205  | Ociad1         | -0.051   | -0.158 | -0.357 |        |        |
| 0.104               | 0.247          | 4.90E-02 |        |        |        |        |
| ENSRNOG000000058588 | Nfxl1          | 0.066    | 0.127  | 0.328  | -0.089 | -0.313 |
| 4.90E-02            |                |          |        |        |        |        |
| ENSRNOG00000019785  | Phtf1          | -0.023   | 0.109  | 0.340  | -0.317 | -0.325 |
| 4.90E-02            |                |          |        |        |        |        |
| ENSRNOG000000023881 | Skap1          | 0.032    | 0.257  | 1.337  | -0.051 | -1.318 |
| 4.90E-02            |                |          |        |        |        |        |
| ENSRNOG000000049385 | Adamtsl4       | -0.240   | -0.114 | -0.230 |        |        |
| 0.273               | 0.604          | 4.91E-02 |        |        |        |        |
| ENSRNOG000000058710 | AABR07021465.2 | -0.119   | 0.483  | 1.384  | -0.618 |        |
| -0.748              | 4.91E-02       |          |        |        |        |        |
| ENSRNOG00000011684  | Auh            | 0.113    | -0.178 | -0.662 | 0.217  | 0.403  |
| 4.91E-02            |                |          |        |        |        |        |
| ENSRNOG000000003603 | Arhgap44       | -0.019   | 0.002  | -0.477 | -0.101 |        |
| 0.351               | 4.92E-02       |          |        |        |        |        |
| ENSRNOG00000018599  | Gga2           | 0.106    | 0.135  | 0.433  | -0.262 | -0.322 |
| 4.92E-02            |                |          |        |        |        |        |
| ENSRNOG000000021068 | Pip5k1a        | 0.095    | -0.096 | -0.434 | 0.078  |        |
| 0.276               | 4.93E-02       |          |        |        |        |        |
| ENSRNOG00000015718  | RGD1307461     | 0.189    | -0.309 | -1.072 | 0.486  |        |
| 0.739               | 4.94E-02       |          |        |        |        |        |



|                      |                |                   |              |             |        |
|----------------------|----------------|-------------------|--------------|-------------|--------|
| ENSRNOG00000023227   | AABR07052585.2 | -0.012            | -0.031       | -0.549      |        |
| 0.154 0.578 4.95E-02 |                |                   |              |             |        |
| ENSRNOG00000050315   | Dcxr           | 0.223 -0.221      | -0.647       | 0.254 0.523 |        |
| 4.95E-02             |                |                   |              |             |        |
| ENSRNOG00000017420   | Nudt6          | -0.143            | -0.174       | -0.504      | 0.173  |
| 0.382 4.96E-02       |                |                   |              |             |        |
| ENSRNOG00000005707   | Bfsp1          | -0.033            | 0.415 1.128  | -0.209      | -0.897 |
| 4.97E-02             |                |                   |              |             |        |
| ENSRNOG00000017446   | Ndufs8         | -0.100            | -0.325       | -0.709      |        |
| 0.350 0.486 4.97E-02 |                |                   |              |             |        |
| ENSRNOG00000032150   | Adcy2          | 0.367 0.399 0.462 | -0.213       | -0.380      |        |
| 4.97E-02             |                |                   |              |             |        |
| ENSRNOG00000009462   | Ccdc90b        | -0.108            | 0.083 0.471  | -0.146      | -      |
| 0.415 4.97E-02       |                |                   |              |             |        |
| ENSRNOG00000001516   | Rapgef4        | -0.130            | -0.195       | -0.502      |        |
| 0.215 0.467 4.99E-02 |                |                   |              |             |        |
| ENSRNOG00000022309   | Frem1          | -0.171            | 0.262 0.841  | -0.403      | -0.945 |
| 4.99E-02             |                |                   |              |             |        |
| ENSRNOG00000042682   | Grpel2         | 0.008 -0.009      | 0.096 -0.016 | -           |        |
| 0.232 4.99E-02       |                |                   |              |             |        |
