# Supplementary material for: A robust neuromuscular system protects rat and human skeletal muscle from sarcopenia
Source: publisher site journal article supplement (doi:10.18632/aging.100926), 2016-03-24
Supplement: Supplementary file [file aging-v8i4-100926-supplementary-material-SD5.pdf]

| Gene Ontology ID | Gene Ontology term (Biological Process)     | Number of annotated genes | Number of significant genes | Number of expected genes | p-value  | (Fisher test)  |
|------------------|---------------------------------------------|---------------------------|-----------------------------|--------------------------|----------|----------------|
| GO:0002376       | immune system process                       | 1210                      | 38                          | 15.96                    | 1.80E-07 |                |
| GO:0006952       | defense response                            | 617                       | 24                          | 8.14                     | 1.50E-06 |                |
| GO:0002252       | immune effector process                     |                           | 331                         | 17                       | 4.37     | 1.50E-06       |
| GO:0006955       | immune response                             | 598                       | 22                          | 7.89                     | 1.00E-05 |                |
| GO:0001775       | cell activation                             | 525                       | 20                          | 6.92                     | 1.70E-05 |                |
| GO:0002456       | T cell mediated immunity                    |                           | 65                          | 7                        | 0.86     | 2.20E-05       |
| GO:0046649       | lymphocyte activation                       | 372                       | 16                          | 4.91                     | 3.00E-05 |                |
| GO:0006950       | response to stress                          | 2004                      | 46                          | 26.43                    | 4.70E-05 |                |
| GO:0001932       | regulation of protein phosphorylation       |                           | 662                         | 22                       | 8.73     | 5.00E-05       |
| GO:0043903       | regulation of symbiosis, encompassing mu... |                           | 104                         | 8                        | 1.37     | 6.60E-05       |
| GO:0045321       | leukocyte activation                        | 443                       | 17                          | 5.84                     | 7.00E-05 |                |
| GO:0042592       | homeostatic process                         | 933                       | 27                          | 12.31                    | 7.10E-05 |                |
| GO:0044699       | single-organism process                     |                           | 7957                        | 122                      | 104.94   | 7.10E-05       |
| GO:0048878       | chemical homeostasis                        | 600                       | 20                          | 7.91                     | 1.10E-04 |                |
| GO:0051338       | regulation of transferase activity          | 508                       | 18                          | 6.7                      | 1.20E-04 |                |
| GO:0050792       | regulation of viral process                 | 87                        | 7                           | 1.15                     | 1.40E-04 |                |
| GO:0042110       | T cell activation                           | 257                       | 12                          | 3.39                     | 1.40E-04 |                |
| GO:0043549       | regulation of kinase activity               |                           | 472                         | 17                       | 6.23     | 1.50E-04       |
| GO:0019058       | viral life cycle                            | 117                       | 8                           | 1.54                     | 1.50E-04 |                |
| GO:0044763       | single-organism cellular process            |                           | 7096                        | 112                      | 93.59    | 1.80E-04       |
| GO:0031399       | regulation of protein modification proce... |                           | 826                         | 24                       |          | 10.89 1.80E-04 |
| GO:0042325       | regulation of phosphorylation               |                           | 837                         | 24                       | 11.04    | 2.20E-04       |
| GO:0051146       | striated muscle cell differentiation        |                           | 193                         | 10                       | 2.55     | 2.30E-04       |
| GO:0002367       | cytokine production involved in immune r... |                           | 44                          | 5                        | 0.58     | 2.70E-04       |
| GO:0010033       | response to organic substance               |                           | 1657                        | 38                       | 21.85    | 2.90E-04       |
| GO:0000768       | syncytium formation by plasma membrane f... |                           | 25                          | 4                        | 0.33     | 3.00E-04       |
| GO:0000096       | sulfur amino acid metabolic process         |                           | 25                          | 4                        | 0.33     | 3.00E-04       |
| GO:0070887       | cellular response to chemical stimulus      | 1363                      | 33                          | 17.98                    |          | 3.10E-04       |
| GO:0007050       | cell cycle arrest                           | 100                       | 7                           | 1.32                     | 3.40E-04 |                |
| GO:0034097       | response to cytokine                        | 415                       | 15                          | 5.47                     | 3.60E-04 |                |
| GO:0006949       | syncytium formation                         | 27                        | 4                           | 0.36                     | 4.00E-04 |                |
| GO:0044419       | interspecies interaction between organis... |                           | 170                         | 9                        | 2.24     | 4.10E-04       |
| GO:0044403       | symbiosis, encompassing mutualism throug... |                           | 170                         | 9                        | 2.24     | 4.10E-04       |
| GO:0043901       | negative regulation of multi-organism pr... |                           | 76                          | 6                        | 1        | 4.80E-04       |

|            |                                             |      |    |       |          |
|------------|---------------------------------------------|------|----|-------|----------|
| GO:0048525 | negative regulation of viral process        | 51   | 5  | 0.67  |          |
|            | 5.30E-04                                    |      |    |       |          |
| GO:0016032 | viral process                               | 141  | 8  | 1.86  | 5.40E-04 |
| GO:0002449 | lymphocyte mediated immunity                | 142  | 8  | 1.87  | 5.70E-04 |
| GO:0032268 | regulation of cellular protein metabolic... | 1060 | 27 |       |          |
|            | 13.98 5.70E-04                              |      |    |       |          |
| GO:0048002 | antigen processing and presentation of p... | 52   | 5  | 0.69  |          |
|            | 5.90E-04                                    |      |    |       |          |
| GO:0002709 | regulation of T cell mediated immunity      | 52   | 5  | 0.69  |          |
|            | 5.90E-04                                    |      |    |       |          |
| GO:0007568 | aging                                       | 258  | 11 | 3.4   | 6.00E-04 |
| GO:0045859 | regulation of protein kinase activity       | 436  | 15 | 5.75  |          |
|            | 6.10E-04                                    |      |    |       |          |
| GO:0006811 | ion transport                               | 846  | 23 | 11.16 | 6.40E-04 |
| GO:0019882 | antigen processing and presentation         | 81   | 6  | 1.07  |          |
|            | 6.80E-04                                    |      |    |       |          |
| GO:2000278 | regulation of DNA biosynthetic process      | 31   | 4  | 0.41  |          |
|            | 6.90E-04                                    |      |    |       |          |
| GO:0002682 | regulation of immune system process         | 639  | 19 | 8.43  |          |
|            | 6.90E-04                                    |      |    |       |          |
| GO:0044764 | multi-organism cellular process             | 148  | 8  | 1.95  | 7.40E-04 |
| GO:0009615 | response to virus                           | 149  | 8  | 1.97  | 7.80E-04 |
| GO:0003009 | skeletal muscle contraction                 | 32   | 4  | 0.42  | 7.80E-04 |
| GO:0001816 | cytokine production                         | 354  | 13 | 4.67  | 7.90E-04 |
| GO:0034341 | response to interferon-gamma                | 56   | 5  | 0.74  | 8.20E-04 |
| GO:0045087 | innate immune response                      | 269  | 11 | 3.55  | 8.40E-04 |
| GO:0002369 | T cell cytokine production                  | 15   | 3  | 0.2   | 9.10E-04 |
| GO:0002474 | antigen processing and presentation of p... | 34   | 4  | 0.45  |          |
|            | 9.90E-04                                    |      |    |       |          |
| GO:0071345 | cellular response to cytokine stimulus      | 321  | 12 | 4.23  |          |
|            | 1.08E-03                                    |      |    |       |          |
| GO:0090279 | regulation of calcium ion import            | 16   | 3  | 0.21  | 1.11E-03 |
| GO:0002706 | regulation of lymphocyte mediated immuni... | 90   | 6  | 1.19  |          |
|            | 1.18E-03                                    |      |    |       |          |
| GO:2000107 | negative regulation of leukocyte apoptot... | 36   | 4  | 0.47  |          |
|            | 1.23E-03                                    |      |    |       |          |
| GO:0007159 | leukocyte cell-cell adhesion                | 36   | 4  | 0.47  | 1.23E-03 |
| GO:0006875 | cellular metal ion homeostasis              | 282  | 11 | 3.72  | 1.24E-03 |
| GO:0010959 | regulation of metal ion transport           | 199  | 9  | 2.62  | 1.25E-03 |
| GO:0055065 | metal ion homeostasis                       | 328  | 12 | 4.33  | 1.30E-03 |
| GO:0065008 | regulation of biological quality            | 1978 | 41 | 26.09 | 1.30E-03 |
| GO:0002440 | production of molecular mediator of immu... | 92   | 6  | 1.21  |          |
|            | 1.33E-03                                    |      |    |       |          |
| GO:0010942 | positive regulation of cell death           | 330  | 12 | 4.35  | 1.37E-03 |
| GO:0051607 | defense response to virus                   | 93   | 6  | 1.23  | 1.40E-03 |
| GO:0080134 | regulation of response to stress            | 626  | 18 | 8.26  | 1.42E-03 |
| GO:0002250 | adaptive immune response                    | 164  | 8  | 2.16  | 1.45E-03 |

|            |                                             |      |    |       |          |
|------------|---------------------------------------------|------|----|-------|----------|
| GO:0070374 | positive regulation of ERK1 and ERK2 cas... | 95   | 6  | 1.25  |          |
|            | 1.57E-03                                    |      |    |       |          |
| GO:0032897 | negative regulation of viral transcripti... | 18   | 3  | 0.24  |          |
|            | 1.58E-03                                    |      |    |       |          |
| GO:0006812 | cation transport                            | 635  | 18 | 8.38  | 1.66E-03 |
| GO:0050881 | musculoskeletal movement                    | 39   | 4  | 0.51  | 1.66E-03 |
| GO:0050879 | multicellular organismal movement           | 39   | 4  | 0.51  | 1.66E-03 |
| GO:0050776 | regulation of immune response               | 339  | 12 | 4.47  | 1.71E-03 |
| GO:0051240 | positive regulation of multicellular org... | 435  | 14 | 5.74  |          |
|            | 1.76E-03                                    |      |    |       |          |
| GO:0055082 | cellular chemical homeostasis               | 388  | 13 | 5.12  | 1.81E-03 |
| GO:0006941 | striated muscle contraction                 | 98   | 6  | 1.29  | 1.84E-03 |
| GO:0042692 | muscle cell differentiation                 | 254  | 10 | 3.35  | 1.93E-03 |
| GO:0051924 | regulation of calcium ion transport         | 134  | 7  | 1.77  |          |
|            | 1.94E-03                                    |      |    |       |          |
| GO:0001819 | positive regulation of cytokine producti... | 173  | 8  | 2.28  |          |
|            | 2.03E-03                                    |      |    |       |          |
| GO:0002819 | regulation of adaptive immune response      | 100  | 6  | 1.32  |          |
|            | 2.04E-03                                    |      |    |       |          |
| GO:0006915 | apoptotic process                           | 1156 | 27 | 15.25 | 2.11E-03 |
| GO:0034612 | response to tumor necrosis factor           | 101  | 6  | 1.33  | 2.14E-03 |
| GO:0002684 | positive regulation of immune system pro... | 396  | 13 | 5.22  |          |
|            | 2.16E-03                                    |      |    |       |          |
| GO:0043068 | positive regulation of programmed cell d... | 303  | 11 | 4     |          |
|            | 2.19E-03                                    |      |    |       |          |
| GO:0002697 | regulation of immune effector process       | 176  | 8  | 2.32  |          |
|            | 2.26E-03                                    |      |    |       |          |
| GO:0043900 | regulation of multi-organism process        | 176  | 8  | 2.32  |          |
|            | 2.26E-03                                    |      |    |       |          |
| GO:0030003 | cellular cation homeostasis                 | 305  | 11 | 4.02  | 2.31E-03 |
| GO:0048871 | multicellular organismal homeostasis        | 177  | 8  | 2.33  |          |
|            | 2.34E-03                                    |      |    |       |          |
| GO:0001817 | regulation of cytokine production           | 306  | 11 | 4.04  | 2.37E-03 |
| GO:0006816 | calcium ion transport                       | 220  | 9  | 2.9   | 2.50E-03 |
| GO:0002443 | leukocyte mediated immunity                 | 179  | 8  | 2.36  | 2.51E-03 |
| GO:0009605 | response to external stimulus               | 1230 | 28 | 16.22 | 2.51E-03 |
| GO:0030282 | bone mineralization                         | 72   | 5  | 0.95  | 2.55E-03 |
| GO:0098542 | defense response to other organism          | 180  | 8  | 2.37  | 2.60E-03 |
| GO:0006873 | cellular ion homeostasis                    | 311  | 11 | 4.1   | 2.68E-03 |
| GO:0042221 | response to chemical                        | 2119 | 42 | 27.95 | 2.71E-03 |
| GO:0030001 | metal ion transport                         | 457  | 14 | 6.03  | 2.77E-03 |
| GO:0012501 | programmed cell death                       | 1180 | 27 | 15.56 | 2.83E-03 |
| GO:0002711 | positive regulation of T cell mediated i... | 45   | 4  | 0.59  |          |
|            | 2.84E-03                                    |      |    |       |          |
| GO:0030595 | leukocyte chemotaxis                        | 107  | 6  | 1.41  | 2.86E-03 |
| GO:0050801 | ion homeostasis                             | 409  | 13 | 5.39  | 2.86E-03 |

|            |                                             |      |    |       |          |  |
|------------|---------------------------------------------|------|----|-------|----------|--|
| GO:0043067 | regulation of programmed cell death         | 948  | 23 | 12.5  |          |  |
|            | 2.92E-03                                    |      |    |       |          |  |
| GO:0055080 | cation homeostasis                          | 362  | 12 | 4.77  | 2.95E-03 |  |
| GO:0010941 | regulation of cell death                    | 1007 | 24 | 13.28 | 2.96E-03 |  |
| GO:0045786 | negative regulation of cell cycle           | 184  | 8  | 2.43  | 2.98E-03 |  |
| GO:0002703 | regulation of leukocyte mediated immunit... | 108  | 6  | 1.42  |          |  |
|            | 3.00E-03                                    |      |    |       |          |  |
| GO:0034113 | heterotypic cell-cell adhesion              | 23   | 3  | 0.3   | 3.28E-03 |  |
| GO:0070229 | negative regulation of lymphocyte apopto... | 23   | 3  | 0.3   |          |  |
|            | 3.28E-03                                    |      |    |       |          |  |
| GO:0055076 | transition metal ion homeostasis            | 78   | 5  | 1.03  | 3.62E-03 |  |
| GO:0001960 | negative regulation of cytokine-mediated... | 24   | 3  | 0.32  |          |  |
|            | 3.71E-03                                    |      |    |       |          |  |
| GO:0032269 | negative regulation of cellular protein ... | 374  | 12 | 4.93  |          |  |
|            | 3.84E-03                                    |      |    |       |          |  |
| GO:0070838 | divalent metal ion transport                | 236  | 9  | 3.11  | 3.98E-03 |  |
| GO:0002460 | adaptive immune response based on somati... | 153  | 7  | 2.02  |          |  |
|            | 4.08E-03                                    |      |    |       |          |  |
| GO:0001910 | regulation of leukocyte mediated cytotox... | 50   | 4  | 0.66  |          |  |
|            | 4.17E-03                                    |      |    |       |          |  |
| GO:0045214 | sarcomere organization                      | 25   | 3  | 0.33  | 4.17E-03 |  |
| GO:0071310 | cellular response to organic substance      | 1096 | 25 | 14.46 |          |  |
|            | 4.30E-03                                    |      |    |       |          |  |
| GO:0072511 | divalent inorganic cation transport         | 241  | 9  | 3.18  |          |  |
|            | 4.57E-03                                    |      |    |       |          |  |
| GO:0006954 | inflammatory response                       | 334  | 11 | 4.41  | 4.61E-03 |  |
| GO:0009408 | response to heat                            | 83   | 5  | 1.09  | 4.73E-03 |  |
| GO:0055072 | iron ion homeostasis                        | 52   | 4  | 0.69  | 4.80E-03 |  |
| GO:0030099 | myeloid cell differentiation                | 243  | 9  | 3.2   | 4.82E-03 |  |
| GO:0042098 | T cell proliferation                        | 119  | 6  | 1.57  | 4.84E-03 |  |
| GO:0050900 | leukocyte migration                         | 159  | 7  | 2.1   | 5.03E-03 |  |
| GO:0046916 | cellular transition metal ion homeostasi... | 53   | 4  | 0.7   |          |  |
|            | 5.14E-03                                    |      |    |       |          |  |
| GO:0046688 | response to copper ion                      | 27   | 3  | 0.36  | 5.21E-03 |  |
| GO:0060761 | negative regulation of response to cytok... | 27   | 3  | 0.36  |          |  |
|            | 5.21E-03                                    |      |    |       |          |  |
| GO:0043269 | regulation of ion transport                 | 340  | 11 | 4.48  | 5.26E-03 |  |
| GO:0042981 | regulation of apoptotic process             | 937  | 22 | 12.36 | 5.36E-03 |  |
| GO:0031214 | biomineral tissue development               | 86   | 5  | 1.13  | 5.49E-03 |  |
| GO:0031341 | regulation of cell killing                  | 54   | 4  | 0.71  | 5.50E-03 |  |
| GO:0030335 | positive regulation of cell migration       | 249  | 9  | 3.28  |          |  |
|            | 5.64E-03                                    |      |    |       |          |  |
| GO:0008219 | cell death                                  | 1242 | 27 | 16.38 | 5.72E-03 |  |
| GO:0014902 | myotube differentiation                     | 87   | 5  | 1.15  | 5.77E-03 |  |
| GO:0045123 | cellular extravasation                      | 28   | 3  | 0.37  | 5.77E-03 |  |
| GO:0050732 | negative regulation of peptidyl-tyrosine... | 28   | 3  | 0.37  |          |  |
|            | 5.77E-03                                    |      |    |       |          |  |
| GO:0046651 | lymphocyte proliferation                    | 164  | 7  | 2.16  | 5.95E-03 |  |
| GO:0016265 | death                                       | 1247 | 27 | 16.45 | 6.04E-03 |  |

|            |                                             |      |    |      |          |
|------------|---------------------------------------------|------|----|------|----------|
| GO:0043065 | positive regulation of apoptotic process    | 299  | 10 | 3.94 |          |
|            | 6.15E-03                                    |      |    |      |          |
| GO:0032943 | mononuclear cell proliferation              | 165  | 7  | 2.18 | 6.15E-03 |
| GO:0071897 | DNA biosynthetic process                    | 56   | 4  | 0.74 | 6.26E-03 |
| GO:0001894 | tissue homeostasis                          | 126  | 6  | 1.66 | 6.37E-03 |
| GO:0006879 | cellular iron ion homeostasis               | 29   | 3  | 0.38 | 6.38E-03 |
| GO:0046782 | regulation of viral transcription           | 29   | 3  | 0.38 | 6.38E-03 |
| GO:2000147 | positive regulation of cell motility        | 254  | 9  | 3.35 |          |
|            | 6.40E-03                                    |      |    |      |          |
| GO:0010035 | response to inorganic substance             | 401  | 12 | 5.29 | 6.65E-03 |
| GO:0097529 | myeloid leukocyte migration                 | 91   | 5  | 1.2  | 6.96E-03 |
| GO:0019725 | cellular homeostasis                        | 455  | 13 | 6    | 6.98E-03 |
| GO:0030154 | cell differentiation                        | 2229 | 42 | 29.4 | 7.00E-03 |
| GO:0006826 | iron ion transport                          | 30   | 3  | 0.4  | 7.02E-03 |
| GO:0019080 | viral gene expression                       | 30   | 3  | 0.4  | 7.02E-03 |
| GO:0019083 | viral transcription                         | 30   | 3  | 0.4  | 7.02E-03 |
| GO:0002700 | regulation of production of molecular me... | 58   | 4  | 0.76 |          |
|            | 7.08E-03                                    |      |    |      |          |
| GO:0050670 | regulation of lymphocyte proliferation      | 129  | 6  | 1.7  |          |
|            | 7.13E-03                                    |      |    |      |          |
| GO:0070661 | leukocyte proliferation                     | 170  | 7  | 2.24 | 7.20E-03 |
| GO:0050667 | homocysteine metabolic process              | 10   | 2  | 0.13 | 7.25E-03 |
| GO:0043922 | negative regulation by host of viral tra... | 10   | 2  | 0.13 |          |
|            | 7.25E-03                                    |      |    |      |          |
| GO:0048305 | immunoglobulin secretion                    | 10   | 2  | 0.13 | 7.25E-03 |
| GO:1900744 | regulation of p38MAPK cascade               | 10   | 2  | 0.13 | 7.25E-03 |
| GO:1900027 | regulation of ruffle assembly               | 10   | 2  | 0.13 | 7.25E-03 |
| GO:0006898 | receptor-mediated endocytosis               | 130  | 6  | 1.71 | 7.40E-03 |
| GO:0032944 | regulation of mononuclear cell prolifera... | 130  | 6  | 1.71 |          |
|            | 7.40E-03                                    |      |    |      |          |
| GO:0010038 | response to metal ion                       | 260  | 9  | 3.43 | 7.42E-03 |
| GO:0030097 | hemopoiesis                                 | 513  | 14 | 6.77 | 7.64E-03 |
| GO:0001933 | negative regulation of protein phosphory... | 216  | 8  | 2.85 |          |
|            | 7.75E-03                                    |      |    |      |          |
| GO:0051272 | positive regulation of cellular componen... | 262  | 9  | 3.46 |          |
|            | 7.79E-03                                    |      |    |      |          |
| GO:0040017 | positive regulation of locomotion           | 262  | 9  | 3.46 | 7.79E-03 |
| GO:0070663 | regulation of leukocyte proliferation       | 132  | 6  | 1.74 |          |
|            | 7.95E-03                                    |      |    |      |          |
| GO:0048584 | positive regulation of response to stimu... | 1030 | 23 |      |          |
|            | 13.58                                       |      |    |      | 8.02E-03 |
| GO:0051347 | positive regulation of transferase activ... | 311  | 10 | 4.1  |          |
|            | 8.02E-03                                    |      |    |      |          |
| GO:0002822 | regulation of adaptive immune response b... | 95   | 5  | 1.25 |          |
|            | 8.32E-03                                    |      |    |      |          |

|            |                                             |      |    |       |          |
|------------|---------------------------------------------|------|----|-------|----------|
| GO:2000106 | regulation of leukocyte apoptotic proces... | 61   | 4  | 0.8   | 8.45E-03 |
| GO:0071621 | granulocyte chemotaxis                      | 61   | 4  | 0.8   | 8.45E-03 |
| GO:0002708 | positive regulation of lymphocyte mediat... | 61   | 4  | 0.8   | 8.45E-03 |
| GO:0001776 | leukocyte homeostasis                       | 61   | 4  | 0.8   | 8.45E-03 |
| GO:0048872 | homeostasis of number of cells              | 176  | 7  | 2.32  | 8.65E-03 |
| GO:0060249 | anatomical structure homeostasis            | 176  | 7  | 2.32  | 8.65E-03 |
| GO:0065007 | biological regulation                       | 6249 | 96 | 82.42 | 8.74E-03 |
| GO:0010831 | positive regulation of myotube different... | 11   | 2  | 0.15  | 8.78E-03 |
| GO:0014874 | response to stimulus involved in regulat... | 11   | 2  | 0.15  | 8.78E-03 |
| GO:1902187 | negative regulation of viral release fro... | 11   | 2  | 0.15  | 8.78E-03 |
| GO:0038066 | p38MAPK cascade                             | 11   | 2  | 0.15  | 8.78E-03 |
| GO:0048875 | chemical homeostasis within a tissue        | 11   | 2  | 0.15  | 8.78E-03 |
| GO:0002724 | regulation of T cell cytokine production    | 11   | 2  | 0.15  | 8.78E-03 |
| GO:0002687 | positive regulation of leukocyte migrati... | 62   | 4  | 0.82  | 8.94E-03 |
| GO:0002824 | positive regulation of adaptive immune r... | 62   | 4  | 0.82  | 8.94E-03 |
| GO:0045860 | positive regulation of protein kinase ac... | 268  | 9  | 3.53  | 8.97E-03 |
| GO:0048524 | positive regulation of viral process        | 33   | 3  | 0.44  | 9.17E-03 |
| GO:0019221 | cytokine-mediated signaling pathway         | 178  | 7  | 2.35  | 9.17E-03 |
| GO:0001934 | positive regulation of protein phosphory... | 420  | 12 | 5.54  | 9.45E-03 |
| GO:0001909 | leukocyte mediated cytotoxicity             | 63   | 4  | 0.83  | 9.45E-03 |
| GO:0002705 | positive regulation of leukocyte mediate... | 63   | 4  | 0.83  | 9.45E-03 |
| GO:0002821 | positive regulation of adaptive immune r... | 63   | 4  | 0.83  | 9.45E-03 |
| GO:0070372 | regulation of ERK1 and ERK2 cascade         | 137  | 6  | 1.81  | 9.46E-03 |
| GO:0003012 | muscle system process                       | 225  | 8  | 2.97  | 9.79E-03 |
| GO:0044033 | multi-organism metabolic process            | 34   | 3  | 0.45  | 9.96E-03 |
| GO:0030239 | myofibril assembly                          | 34   | 3  | 0.45  | 9.96E-03 |
| GO:0097530 | granulocyte migration                       | 64   | 4  | 0.84  | 9.98E-03 |
| GO:0051249 | regulation of lymphocyte activation         | 226  | 8  | 2.98  | 1.00E-02 |
| GO:0014854 | response to inactivity                      | 12   | 2  | 0.16  | 1.05E-02 |
| GO:0060333 | interferon-gamma-mediated signaling path... | 12   | 2  | 0.16  | 1.05E-02 |
| GO:0060307 | regulation of ventricular cardiac muscle... | 12   | 2  | 0.16  | 1.05E-02 |

|            |                                             |      |    |          |          |
|------------|---------------------------------------------|------|----|----------|----------|
| GO:0045070 | positive regulation of viral genome repl... | 12   | 2  | 0.16     |          |
|            | 1.05E-02                                    |      |    |          |          |
| GO:0051248 | negative regulation of protein metabolic... | 426  | 12 | 5.62     |          |
|            | 1.05E-02                                    |      |    |          |          |
| GO:0001916 | positive regulation of T cell mediated c... | 35   | 3  | 0.46     |          |
|            | 1.08E-02                                    |      |    |          |          |
| GO:0002718 | regulation of cytokine production involv... | 35   | 3  | 0.46     |          |
|            | 1.08E-02                                    |      |    |          |          |
| GO:0045069 | regulation of viral genome replication      | 35   | 3  | 0.46     |          |
|            | 1.08E-02                                    |      |    |          |          |
| GO:0048534 | hematopoietic or lymphoid organ developm... | 536  | 14 | 7.07     |          |
|            | 1.10E-02                                    |      |    |          |          |
| GO:0033500 | carbohydrate homeostasis                    | 143  | 6  | 1.89     | 1.15E-02 |
| GO:0042593 | glucose homeostasis                         | 143  | 6  | 1.89     | 1.15E-02 |
| GO:1901264 | carbohydrate derivative transport           | 36   | 3  | 0.47     | 1.17E-02 |
| GO:0001914 | regulation of T cell mediated cytotoxici... | 36   | 3  | 0.47     |          |
|            | 1.17E-02                                    |      |    |          |          |
| GO:0002286 | T cell activation involved in immune res... | 36   | 3  | 0.47     |          |
|            | 1.17E-02                                    |      |    |          |          |
| GO:0060326 | cell chemotaxis                             | 144  | 6  | 1.9      | 1.19E-02 |
| GO:0031400 | negative regulation of protein modificat... | 281  | 9  | 3.71     |          |
|            | 1.20E-02                                    |      |    |          |          |
| GO:0031347 | regulation of defense response              | 281  | 9  | 3.71     | 1.20E-02 |
| GO:0060009 | Sertoli cell development                    | 13   | 2  | 0.17     | 1.22E-02 |
| GO:0002820 | negative regulation of adaptive immune r... | 13   | 2  | 0.17     |          |
|            | 1.22E-02                                    |      |    |          |          |
| GO:0071900 | regulation of protein serine/threonine k... | 282  | 9  | 3.72     |          |
|            | 1.23E-02                                    |      |    |          |          |
| GO:0050730 | regulation of peptidyl-tyrosine phosphor... | 145  | 6  | 1.91     |          |
|            | 1.23E-02                                    |      |    |          |          |
| GO:0019220 | regulation of phosphate metabolic proces... | 1258 | 26 |          |          |
|            | 16.59                                       |      |    | 1.27E-02 |          |
| GO:0072503 | cellular divalent inorganic cation homeo... | 236  | 8  | 3.11     |          |
|            | 1.28E-02                                    |      |    |          |          |
| GO:0007229 | integrin-mediated signaling pathway         | 69   | 4  | 0.91     |          |
|            | 1.29E-02                                    |      |    |          |          |
| GO:0006468 | protein phosphorylation                     | 1015 | 22 | 13.39    | 1.32E-02 |
| GO:0048869 | cellular developmental process              | 2380 | 43 | 31.39    | 1.32E-02 |
| GO:0051174 | regulation of phosphorus metabolic proce... | 1263 | 26 |          |          |
|            | 16.66                                       |      |    | 1.33E-02 |          |
| GO:0033674 | positive regulation of kinase activity      | 286  | 9  | 3.77     |          |
|            | 1.33E-02                                    |      |    |          |          |
| GO:0048518 | positive regulation of biological proces... | 3007 | 52 |          |          |
|            | 39.66                                       |      |    | 1.35E-02 |          |
| GO:0070371 | ERK1 and ERK2 cascade                       | 148  | 6  | 1.95     | 1.35E-02 |
| GO:2000379 | positive regulation of reactive oxygen s... | 38   | 3  | 0.5      |          |
|            | 1.35E-02                                    |      |    |          |          |
| GO:0006801 | superoxide metabolic process                | 38   | 3  | 0.5      | 1.35E-02 |
| GO:0070509 | calcium ion import                          | 38   | 3  | 0.5      | 1.35E-02 |
| GO:0002699 | positive regulation of immune effector p... | 108  | 5  | 1.42     |          |
|            | 1.40E-02                                    |      |    |          |          |

|            |                                             |      |    |       |          |  |
|------------|---------------------------------------------|------|----|-------|----------|--|
| GO:0060338 | regulation of type I interferon-mediated... | 14   | 2  | 0.18  |          |  |
|            | 1.42E-02                                    |      |    |       |          |  |
| GO:0000097 | sulfur amino acid biosynthetic process      | 14   | 2  | 0.18  |          |  |
|            | 1.42E-02                                    |      |    |       |          |  |
| GO:0055094 | response to lipoprotein particle            | 14   | 2  | 0.18  | 1.42E-02 |  |
| GO:0070233 | negative regulation of T cell apoptotic ... | 14   | 2  | 0.18  |          |  |
|            | 1.42E-02                                    |      |    |       |          |  |
| GO:0007569 | cell aging                                  | 71   | 4  | 0.94  | 1.42E-02 |  |
| GO:0051246 | regulation of protein metabolic process     | 1334 | 27 | 17.59 |          |  |
|            | 1.44E-02                                    |      |    |       |          |  |
| GO:0071156 | regulation of cell cycle arrest             | 39   | 3  | 0.51  | 1.45E-02 |  |
| GO:0043902 | positive regulation of multi-organism pr... | 39   | 3  | 0.51  |          |  |
|            | 1.45E-02                                    |      |    |       |          |  |
| GO:0001913 | T cell mediated cytotoxicity                | 39   | 3  | 0.51  | 1.45E-02 |  |
| GO:0043491 | protein kinase B signaling                  | 109  | 5  | 1.44  | 1.45E-02 |  |
| GO:0051094 | positive regulation of developmental pro... | 669  | 16 | 8.82  |          |  |
|            | 1.48E-02                                    |      |    |       |          |  |
| GO:0001906 | cell killing                                | 72   | 4  | 0.95  | 1.49E-02 |  |
| GO:0055007 | cardiac muscle cell differentiation         | 72   | 4  | 0.95  |          |  |
|            | 1.49E-02                                    |      |    |       |          |  |
| GO:0042632 | cholesterol homeostasis                     | 40   | 3  | 0.53  | 1.55E-02 |  |
| GO:0071887 | leukocyte apoptotic process                 | 73   | 4  | 0.96  | 1.56E-02 |  |
| GO:0001503 | ossification                                | 294  | 9  | 3.88  | 1.57E-02 |  |
| GO:0048583 | regulation of response to stimulus          | 2065 | 38 | 27.24 | 1.58E-02 |  |
| GO:0030574 | collagen catabolic process                  | 15   | 2  | 0.2   | 1.62E-02 |  |
| GO:0061028 | establishment of endothelial barrier        | 15   | 2  | 0.2   |          |  |
|            | 1.62E-02                                    |      |    |       |          |  |
| GO:0086005 | ventricular cardiac muscle cell action p... | 15   | 2  | 0.2   |          |  |
|            | 1.62E-02                                    |      |    |       |          |  |
| GO:0055092 | sterol homeostasis                          | 41   | 3  | 0.54  | 1.66E-02 |  |
| GO:0071346 | cellular response to interferon-gamma       | 41   | 3  | 0.54  |          |  |
|            | 1.66E-02                                    |      |    |       |          |  |
| GO:0019079 | viral genome replication                    | 41   | 3  | 0.54  | 1.66E-02 |  |
| GO:0002520 | immune system development                   | 566  | 14 | 7.46  | 1.70E-02 |  |
| GO:0072507 | divalent inorganic cation homeostasis       | 249  | 8  | 3.28  |          |  |
|            | 1.72E-02                                    |      |    |       |          |  |
| GO:0030029 | actin filament-based process                | 404  | 11 | 5.33  | 1.77E-02 |  |
| GO:0051704 | multi-organism process                      | 1044 | 22 | 13.77 | 1.78E-02 |  |
| GO:0023014 | signal transduction by phosphorylation      | 460  | 12 | 6.07  |          |  |
|            | 1.83E-02                                    |      |    |       |          |  |
| GO:0060008 | Sertoli cell differentiation                | 16   | 2  | 0.21  | 1.84E-02 |  |
| GO:0044243 | multicellular organismal catabolic proce... | 16   | 2  | 0.21  |          |  |
|            | 1.84E-02                                    |      |    |       |          |  |
| GO:0097178 | ruffle assembly                             | 16   | 2  | 0.21  | 1.84E-02 |  |
| GO:0002707 | negative regulation of lymphocyte mediat... | 16   | 2  | 0.21  |          |  |
|            | 1.84E-02                                    |      |    |       |          |  |
| GO:0070228 | regulation of lymphocyte apoptotic proce... | 43   | 3  | 0.57  |          |  |
|            | 1.89E-02                                    |      |    |       |          |  |
| GO:0032970 | regulation of actin filament-based proce... | 207  | 7  | 2.73  |          |  |
|            | 1.97E-02                                    |      |    |       |          |  |



|            |                                             |     |    |      |          |
|------------|---------------------------------------------|-----|----|------|----------|
| GO:1902533 | positive regulation of intracellular sig... | 521 | 13 | 6.87 |          |
|            | 1.99E-02                                    |     |    |      |          |
| GO:0051817 | modification of morphology or physiology... | 44  | 3  | 0.58 |          |
|            | 2.00E-02                                    |     |    |      |          |
| GO:0071479 | cellular response to ionizing radiation     | 44  | 3  | 0.58 |          |
|            | 2.00E-02                                    |     |    |      |          |
| GO:0061061 | muscle structure development                | 412 | 11 | 5.43 | 2.02E-02 |
| GO:0002521 | leukocyte differentiation                   | 307 | 9  | 4.05 | 2.02E-02 |
| GO:0043921 | modulation by host of viral transcriptio... | 17  | 2  | 0.22 |          |
|            | 2.06E-02                                    |     |    |      |          |
| GO:1902186 | regulation of viral release from host ce... | 17  | 2  | 0.22 |          |
|            | 2.06E-02                                    |     |    |      |          |
| GO:0060337 | type I interferon signaling pathway         | 17  | 2  | 0.22 |          |
|            | 2.06E-02                                    |     |    |      |          |
| GO:0006471 | protein ADP-ribosylation                    | 17  | 2  | 0.22 | 2.06E-02 |
| GO:0052472 | modulation by host of symbiont transcrip... | 17  | 2  | 0.22 |          |
|            | 2.06E-02                                    |     |    |      |          |
| GO:0002704 | negative regulation of leukocyte mediate... | 17  | 2  | 0.22 |          |
|            | 2.06E-02                                    |     |    |      |          |
| GO:0071357 | cellular response to type I interferon      | 17  | 2  | 0.22 |          |
|            | 2.06E-02                                    |     |    |      |          |
| GO:0051926 | negative regulation of calcium ion trans... | 17  | 2  | 0.22 |          |
|            | 2.06E-02                                    |     |    |      |          |
| GO:0051707 | response to other organism                  | 468 | 12 | 6.17 | 2.06E-02 |
| GO:0043207 | response to external biotic stimulus        | 468 | 12 | 6.17 |          |
|            | 2.06E-02                                    |     |    |      |          |
| GO:0042326 | negative regulation of phosphorylation      | 258 | 8  | 3.4  |          |
|            | 2.08E-02                                    |     |    |      |          |
| GO:0055002 | striated muscle cell development            | 120 | 5  | 1.58 | 2.11E-02 |
| GO:0002526 | acute inflammatory response                 | 80  | 4  | 1.06 | 2.12E-02 |
| GO:0046330 | positive regulation of JNK cascade          | 45  | 3  | 0.59 | 2.13E-02 |
| GO:0043502 | regulation of muscle adaptation             | 45  | 3  | 0.59 | 2.13E-02 |
| GO:0031401 | positive regulation of protein modificat... | 528 | 13 | 6.96 |          |
|            | 2.19E-02                                    |     |    |      |          |
| GO:0002690 | positive regulation of leukocyte chemota... | 46  | 3  | 0.61 |          |
|            | 2.25E-02                                    |     |    |      |          |
| GO:0044092 | negative regulation of molecular functio... | 588 | 14 | 7.76 |          |
|            | 2.29E-02                                    |     |    |      |          |
| GO:0070555 | response to interleukin-1                   | 82  | 4  | 1.08 | 2.30E-02 |
| GO:0071356 | cellular response to tumor necrosis fact... | 82  | 4  | 1.08 |          |
|            | 2.30E-02                                    |     |    |      |          |
| GO:0002694 | regulation of leukocyte activation          | 263 | 8  | 3.47 | 2.30E-02 |
| GO:0046640 | regulation of alpha-beta T cell prolifer... | 18  | 2  | 0.24 |          |
|            | 2.30E-02                                    |     |    |      |          |
| GO:0048247 | lymphocyte chemotaxis                       | 18  | 2  | 0.24 | 2.30E-02 |
| GO:0052312 | modulation of transcription in other org... | 18  | 2  | 0.24 |          |
|            | 2.30E-02                                    |     |    |      |          |
| GO:0051354 | negative regulation of oxidoreductase ac... | 18  | 2  | 0.24 |          |
|            | 2.30E-02                                    |     |    |      |          |

|            |                                             |      |    |       |          |
|------------|---------------------------------------------|------|----|-------|----------|
| GO:1901016 | regulation of potassium ion transmembran... | 18   | 2  | 0.24  | 2.30E-02 |
| GO:0019076 | viral release from host cell                | 18   | 2  | 0.24  | 2.30E-02 |
| GO:0051239 | regulation of multicellular organismal p... | 1583 | 30 | 20.88 | 2.30E-02 |
| GO:0072593 | reactive oxygen species metabolic proces... | 123  | 5  | 1.62  | 2.32E-02 |
| GO:0030500 | regulation of bone mineralization           | 47   | 3  | 0.62  | 2.39E-02 |
| GO:0001912 | positive regulation of leukocyte mediate... | 47   | 3  | 0.62  | 2.39E-02 |
| GO:0031032 | actomyosin structure organization           | 47   | 3  | 0.62  | 2.39E-02 |
| GO:0035821 | modification of morphology or physiology... | 47   | 3  | 0.62  | 2.39E-02 |
| GO:0044765 | single-organism transport                   | 2124 | 38 | 28.01 | 2.41E-02 |
| GO:0032956 | regulation of actin cytoskeleton organiz... | 169  | 6  | 2.23  | 2.43E-02 |
| GO:0043410 | positive regulation of MAPK cascade         | 267  | 8  | 3.52  | 2.49E-02 |
| GO:0006790 | sulfur compound metabolic process           | 170  | 6  | 2.24  | 2.49E-02 |
| GO:0042127 | regulation of cell proliferatation          | 956  | 20 | 12.61 | 2.54E-02 |
| GO:0007520 | myoblast fusion                             | 19   | 2  | 0.25  | 2.55E-02 |
| GO:0042092 | type 2 immune response                      | 19   | 2  | 0.25  | 2.55E-02 |
| GO:0045736 | negative regulation of cyclin-dependent ... | 19   | 2  | 0.25  | 2.55E-02 |
| GO:0034340 | response to type I interferon               | 19   | 2  | 0.25  | 2.55E-02 |
| GO:0071359 | cellular response to dsRNA                  | 19   | 2  | 0.25  | 2.55E-02 |
| GO:0032412 | regulation of ion transmembrane transpor... | 85   | 4  | 1.12  | 2.58E-02 |
| GO:0002685 | regulation of leukocyte migration           | 85   | 4  | 1.12  | 2.58E-02 |
| GO:0051092 | positive regulation of NF-kappaB transcr... | 85   | 4  | 1.12  | 2.58E-02 |
| GO:0009607 | response to biotic stimulus                 | 484  | 12 | 6.38  | 2.60E-02 |
| GO:0006936 | muscle contraction                          | 172  | 6  | 2.27  | 2.62E-02 |
| GO:0006575 | cellular modified amino acid metabolic p... | 127  | 5  | 1.68  | 2.62E-02 |
| GO:0055001 | muscle cell development                     | 127  | 5  | 1.68  | 2.62E-02 |
| GO:0045088 | regulation of innate immune response        | 127  | 5  | 1.68  | 2.62E-02 |
| GO:0046634 | regulation of alpha-beta T cell activati... | 49   | 3  | 0.65  | 2.66E-02 |
| GO:0006810 | transport                                   | 2553 | 44 | 33.67 | 2.68E-02 |
| GO:0050671 | positive regulation of lymphocyte prolif... | 86   | 4  | 1.13  | 2.68E-02 |
| GO:0035051 | cardiocyte differentiation                  | 86   | 4  | 1.13  | 2.68E-02 |
| GO:0009888 | tissue development                          | 1217 | 24 | 16.05 | 2.77E-02 |
| GO:0032946 | positive regulation of mononuclear cell ... | 87   | 4  | 1.15  | 2.78E-02 |

|            |                                             |      |    |       |          |
|------------|---------------------------------------------|------|----|-------|----------|
| GO:0032872 | regulation of stress-activated MAPK casc... | 129  | 5  | 1.7   | 2.78E-02 |
| GO:0007160 | cell-matrix adhesion                        | 129  | 5  | 1.7   | 2.78E-02 |
| GO:0030593 | neutrophil chemotaxis                       | 50   | 3  | 0.66  | 2.80E-02 |
| GO:0015748 | organophosphate ester transport             | 50   | 3  | 0.66  | 2.80E-02 |
| GO:0070167 | regulation of biomineral tissue developm... | 50   | 3  | 0.66  | 2.80E-02 |
| GO:0002478 | antigen processing and presentation of e... | 20   | 2  | 0.26  | 2.81E-02 |
| GO:0060306 | regulation of membrane repolarization       | 20   | 2  | 0.26  | 2.81E-02 |
| GO:0030947 | regulation of vascular endothelial growt... | 20   | 2  | 0.26  | 2.81E-02 |
| GO:0006874 | cellular calcium ion homeostasis            | 223  | 7  | 2.94  | 2.81E-02 |
| GO:0034765 | regulation of ion transmembrane transpor... | 175  | 6  | 2.31  | 2.82E-02 |
| GO:0009266 | response to temperature stimulus            | 130  | 5  | 1.71  | 2.86E-02 |
| GO:0090257 | regulation of muscle system process         | 130  | 5  | 1.71  | 2.86E-02 |
| GO:0070302 | regulation of stress-activated protein k... | 130  | 5  | 1.71  | 2.86E-02 |
| GO:0051090 | regulation of sequence-specific DNA bind... | 224  | 7  | 2.95  | 2.87E-02 |
| GO:0065009 | regulation of molecular function            | 1614 | 30 | 21.29 | 2.92E-02 |
| GO:1990266 | neutrophil migration                        | 51   | 3  | 0.67  | 2.95E-02 |
| GO:0002260 | lymphocyte homeostasis                      | 51   | 3  | 0.67  | 2.95E-02 |
| GO:0031343 | positive regulation of cell killing         | 51   | 3  | 0.67  | 2.95E-02 |
| GO:0016310 | phosphorylation                             | 1354 | 26 | 17.86 | 2.97E-02 |
| GO:0051896 | regulation of protein kinase B signaling    | 89   | 4  | 1.17  | 2.99E-02 |
| GO:0070665 | positive regulation of leukocyte prolife... | 89   | 4  | 1.17  | 2.99E-02 |
| GO:0022898 | regulation of transmembrane transporter ... | 89   | 4  | 1.17  | 2.99E-02 |
| GO:0030307 | positive regulation of cell growth          | 89   | 4  | 1.17  | 2.99E-02 |
| GO:0046633 | alpha-beta T cell proliferatation           | 21   | 2  | 0.28  | 3.08E-02 |
| GO:0002720 | positive regulation of cytokine producti... | 21   | 2  | 0.28  | 3.08E-02 |
| GO:0086002 | cardiac muscle cell action potential inv... | 21   | 2  | 0.28  | 3.08E-02 |
| GO:0045446 | endothelial cell differentiation            | 52   | 3  | 0.69  | 3.10E-02 |
| GO:0001959 | regulation of cytokine-mediated signalin... | 52   | 3  | 0.69  | 3.10E-02 |
| GO:0050777 | negative regulation of immune response      | 52   | 3  | 0.69  | 3.10E-02 |



|            |                                             |      |      |       |          |
|------------|---------------------------------------------|------|------|-------|----------|
| GO:0000041 | transition metal ion transport              | 56   | 3    | 0.74  | 3.75E-02 |
| GO:0071347 | cellular response to interleukin-156        |      | 3    | 0.74  | 3.75E-02 |
| GO:0032409 | regulation of transporter activity          | 96   | 4    | 1.27  | 3.79E-02 |
| GO:0070588 | calcium ion transmembrane transport         | 96   | 4    | 1.27  | 3.79E-02 |
| GO:0043408 | regulation of MAPK cascade                  | 399  | 10   | 5.26  | 3.81E-02 |
| GO:0071396 | cellular response to lipid                  | 291  | 8    | 3.84  | 3.86E-02 |
| GO:0050789 | regulation of biological process            | 5958 | 89   | 78.58 | 3.88E-02 |
| GO:0032874 | positive regulation of stress-activated ... |      | 57   | 3     | 0.75     |
|            | 3.92E-02                                    |      |      |       |          |
| GO:0060759 | regulation of response to cytokine stimu... |      | 57   | 3     | 0.75     |
|            | 3.92E-02                                    |      |      |       |          |
| GO:0051247 | positive regulation of protein metabolic... |      | 693  | 15    | 9.14     |
|            | 3.93E-02                                    |      |      |       |          |
| GO:0016049 | cell growth                                 | 292  | 8    | 3.85  | 3.93E-02 |
| GO:0071158 | positive regulation of cell cycle arrest    |      | 24   | 2     | 0.32     |
|            | 3.94E-02                                    |      |      |       |          |
| GO:1901379 | regulation of potassium ion transmembran... |      | 24   | 2     | 0.32     |
|            | 3.94E-02                                    |      |      |       |          |
| GO:0051851 | modification by host of symbiont morphol... |      | 24   | 2     | 0.32     |
|            | 3.94E-02                                    |      |      |       |          |
| GO:0086001 | cardiac muscle cell action potential        |      | 24   | 2     | 0.32     |
|            | 3.94E-02                                    |      |      |       |          |
| GO:0006469 | negative regulation of protein kinase ac... |      | 142  | 5     | 1.87     |
|            | 3.96E-02                                    |      |      |       |          |
| GO:0006796 | phosphate-containing compound metabolic ... |      | 2548 | 43    | 33.61    |
|            | 3.97E-02                                    |      |      |       |          |
| GO:0051897 | positive regulation of protein kinase B ... |      | 58   | 3     | 0.76     |
|            | 4.09E-02                                    |      |      |       |          |
| GO:0070304 | positive regulation of stress-activated ... |      | 58   | 3     | 0.76     |
|            | 4.09E-02                                    |      |      |       |          |
| GO:0000086 | G2/M transition of mitotic cell cycle       |      | 58   | 3     | 0.76     |
|            | 4.09E-02                                    |      |      |       |          |
| GO:0070482 | response to oxygen levels                   | 295  | 8    | 3.89  | 4.13E-02 |
| GO:0042113 | B cell activation                           | 144  | 5    | 1.9   | 4.17E-02 |
| GO:0048588 | developmental cell growth                   | 99   | 4    | 1.31  | 4.17E-02 |
| GO:1902305 | regulation of sodium ion transmembrane t... |      | 25   | 2     | 0.33     |
|            | 4.25E-02                                    |      |      |       |          |
| GO:0070534 | protein K63-linked ubiquitination           | 25   | 2    | 0.33  | 4.25E-02 |
| GO:0051702 | interaction with symbiont                   | 25   | 2    | 0.33  | 4.25E-02 |
| GO:0070296 | sarcoplasmic reticulum calcium ion trans... |      | 25   | 2     | 0.33     |
|            | 4.25E-02                                    |      |      |       |          |
| GO:0086009 | membrane repolarization                     | 25   | 2    | 0.33  | 4.25E-02 |
| GO:0002702 | positive regulation of production of mol... |      | 25   | 2     | 0.33     |
|            | 4.25E-02                                    |      |      |       |          |
| GO:0070232 | regulation of T cell apoptotic process      | 25   | 2    | 0.33  | 4.25E-02 |
|            | 4.25E-02                                    |      |      |       |          |
| GO:0019884 | antigen processing and presentation of e... |      | 25   | 2     | 0.33     |
|            | 4.25E-02                                    |      |      |       |          |

|            |                                             |      |    |       |          |
|------------|---------------------------------------------|------|----|-------|----------|
| GO:0051155 | positive regulation of striated muscle c... | 25   | 2  | 0.33  |          |
|            | 4.25E-02                                    |      |    |       |          |
| GO:0042787 | protein ubiquitination involved in ubiqu... | 59   | 3  | 0.78  |          |
|            | 4.27E-02                                    |      |    |       |          |
| GO:0042770 | signal transduction in response to DNA d... | 59   | 3  | 0.78  |          |
|            | 4.27E-02                                    |      |    |       |          |
| GO:0060537 | muscle tissue development                   | 298  | 8  | 3.93  | 4.34E-02 |
| GO:0051403 | stress-activated MAPK cascade               | 146  | 5  | 1.93  | 4.38E-02 |
| GO:0032501 | multicellular organismal process            | 3788 | 60 | 49.96 | 4.42E-02 |
| GO:0051234 | establishment of localization               | 2638 | 44 | 34.79 | 4.45E-02 |
| GO:0006641 | triglyceride metabolic process              | 60   | 3  | 0.79  | 4.45E-02 |
| GO:0044839 | cell cycle G2/M phase transition            | 60   | 3  | 0.79  | 4.45E-02 |
| GO:0055088 | lipid homeostasis                           | 60   | 3  | 0.79  | 4.45E-02 |
| GO:0030316 | osteoclast differentiation                  | 60   | 3  | 0.79  | 4.45E-02 |
| GO:0051258 | protein polymerization                      | 147  | 5  | 1.94  | 4.49E-02 |
| GO:0030890 | positive regulation of B cell proliferat... | 26   | 2  | 0.34  | 4.57E-02 |
|            | 4.57E-02                                    |      |    |       |          |
| GO:0030501 | positive regulation of bone mineralizati... | 26   | 2  | 0.34  | 4.57E-02 |
|            | 4.57E-02                                    |      |    |       |          |
| GO:0045429 | positive regulation of nitric oxide bios... | 26   | 2  | 0.34  | 4.57E-02 |
|            | 4.57E-02                                    |      |    |       |          |
| GO:0050798 | activated T cell proliferation              | 26   | 2  | 0.34  | 4.57E-02 |
| GO:0043200 | response to amino acid                      | 102  | 4  | 1.35  | 4.57E-02 |
| GO:0051251 | positive regulation of lymphocyte activa... | 148  | 5  | 1.95  | 4.60E-02 |
|            | 4.60E-02                                    |      |    |       |          |
| GO:0006793 | phosphorus metabolic process                | 2576 | 43 | 33.97 | 4.67E-02 |
| GO:0008285 | negative regulation of cell proliferatio... | 414  | 10 | 5.46  | 4.69E-02 |
|            | 4.69E-02                                    |      |    |       |          |
| GO:0030036 | actin cytoskeleton organization             | 358  | 9  | 4.72  | 4.71E-02 |
| GO:0031098 | stress-activated protein kinase signalin... | 149  | 5  | 1.97  | 4.71E-02 |
|            | 4.71E-02                                    |      |    |       |          |
| GO:1901701 | cellular response to oxygen-containing c... | 590  | 13 | 7.78  | 4.74E-02 |
|            | 4.74E-02                                    |      |    |       |          |
| GO:0050793 | regulation of developmental process         | 1349 | 25 | 17.79 | 4.75E-02 |
|            | 4.75E-02                                    |      |    |       |          |
| GO:0003158 | endothelium development                     | 62   | 3  | 0.82  | 4.83E-02 |
| GO:0043500 | muscle adaptation                           | 62   | 3  | 0.82  | 4.83E-02 |
| GO:0051928 | positive regulation of calcium ion trans... | 62   | 3  | 0.82  | 4.83E-02 |
|            | 4.83E-02                                    |      |    |       |          |
| GO:0006778 | porphyrin-containing compound metabolic ... | 27   | 2  | 0.36  | 4.89E-02 |
|            | 4.89E-02                                    |      |    |       |          |
| GO:0032410 | negative regulation of transporter activ... | 27   | 2  | 0.36  | 4.89E-02 |
|            | 4.89E-02                                    |      |    |       |          |
| GO:0070169 | positive regulation of biomineral tissue... | 27   | 2  | 0.36  | 4.89E-02 |
|            | 4.89E-02                                    |      |    |       |          |
| GO:0031529 | ruffle organization                         | 27   | 2  | 0.36  | 4.89E-02 |

|            |                                             |     |    |      |          |
|------------|---------------------------------------------|-----|----|------|----------|
| GO:0071622 | regulation of granulocyte chemotaxis        | 27  | 2  | 0.36 |          |
|            | 4.89E-02                                    |     |    |      |          |
| GO:0045773 | positive regulation of axon extension       | 27  | 2  | 0.36 |          |
|            | 4.89E-02                                    |     |    |      |          |
| GO:0001782 | B cell homeostasis                          | 27  | 2  | 0.36 | 4.89E-02 |
| GO:0030101 | natural killer cell activation              | 27  | 2  | 0.36 | 4.89E-02 |
| GO:0014911 | positive regulation of smooth muscle cel... | 27  | 2  | 0.36 |          |
|            | 4.89E-02                                    |     |    |      |          |
| GO:0009967 | positive regulation of signal transducti... | 776 | 16 |      |          |
|            | 10.23 4.90E-02                              |     |    |      |          |
| GO:0045926 | negative regulation of growth               | 151 | 5  | 1.99 | 4.94E-02 |
